# Supplementary material
Source: PubMed Central journal article supplement (PMC2655233)
Supplement: NIHMS95483-supplement-SI.pdf [file NIHMS95483-supplement-SI.pdf]

Supporting Information for

**Substituent Effects in the Benzene Dimer are Due to Direct Interactions of the Substituents with the Unsubstituted Benzene**

Steven E. Wheeler\* and K. N. Houk\*

*Department of Chemistry and Biochemistry, University of California, Los Angeles, CA 90095*

**Complete Citation for Ref. 14.**

E. J. Bylaska, W. A. de Jong, K. Kowalski, T. P. Straatsma, M. Valiev, D. Wang, E. Aprà, T. L. Windus, S. Hirata, M. T. Hackler, Y. Zhao, P.-D. Fan, R. J. Harrison, M. Dupuis, D. M. A. Smith, J. Nieplocha, V. Tipparaju, M. Krishnan, A. A. Auer, M. Nooijen, E. Brown, G. Cisneros, G. I. Fann, H. Früchtl, J. Garza, K. Hirao, R. Kendall, J. A. Nichols, K. Tsemekhman, K. Wolinski, J. Anchell, D. Bernholdt, P. Borowski, T. Clark, D. Clerc, H. Dachsel, M. Deegan, K. Dyall, D. Elwood, E. Glendening, M. Gutowski, A. Hess, J. Jaffe, B. Johnson, J. Ju, R. Kobayashi, R. Kutteh, Z. Lin, R. Littlefield, X. Long, B. Meng, T. Nakajima, S. Niu, L. Pollack, M. Rosing, G. Sandrone, M. Stave, H. Taylor, G. Thomas, J. van Lenthe, A. Wong, and Z. Zhang, "NWChem, A Computational Chemistry Package for Parallel Computers, Version 5.0" (2006), Pacific Northwest National Laboratory, Richland, Washington 99352-0999, USA.

Table S1. Sigma meta constants, sigma para constants, absolute energies (hartree) of substituted benzenes [ $E(C_6H_5-X)$ ] and dimers of substituted benzenes with benzene [ $E(\text{dimer})$ ], interaction energies [ $E(\text{dimerization})$ , kcal mol<sup>-1</sup>] and interaction energies relative to X = H [ $E_{\text{int}}$ , kcal mol<sup>-1</sup>]

| X                                | $\sigma_m$ | $\sigma_p$ | $E(C_6H_5-X)$ | $E(\text{dimer})$ | $E(\text{dimerization})$ | $E_{\text{int}}$ |
|----------------------------------|------------|------------|---------------|-------------------|--------------------------|------------------|
| H                                | 0.00       | 0.00       | -232.224456   | -464.449704       | -0.50                    | 0.00             |
| BF <sub>2</sub>                  | 0.32       | 0.48       | -456.302043   | -688.528465       | -1.23                    | -0.74            |
| CCH                              | 0.21       | 0.23       | -308.367207   | -540.593559       | -1.19                    | -0.69            |
| CF <sub>3</sub>                  | 0.43       | 0.54       | -569.265344   | -801.492320       | -1.58                    | -1.08            |
| CH <sub>3</sub>                  | -0.07      | -0.17      | -271.535226   | -503.760915       | -0.77                    | -0.28            |
| CHO                              | 0.35       | 0.42       | -345.540038   | -577.766707       | -1.39                    | -0.89            |
| CN                               | 0.56       | 0.66       | -324.465127   | -556.692386       | -1.76                    | -1.26            |
| COCH <sub>3</sub>                | 0.38       | 0.50       | -384.857390   | -617.084018       | -1.36                    | -0.87            |
| COOCH <sub>3</sub>               | 0.37       | 0.45       | -460.085848   | -692.312341       | -1.28                    | -0.78            |
| COOH                             | 0.37       | 0.45       | -420.789039   | -653.015682       | -1.37                    | -0.88            |
| F                                | 0.34       | 0.06       | -331.460889   | -563.686968       | -1.02                    | -0.52            |
| N(CH <sub>3</sub> ) <sub>2</sub> | -0.15      | -0.83      | -366.172965   | -598.398479       | -0.66                    | -0.17            |
| NH <sub>2</sub>                  | -0.16      | -0.66      | -287.575100   | -519.800708       | -0.72                    | -0.23            |
| NHCH <sub>3</sub>                | -0.30      | -0.84      | -326.874453   | -559.099979       | -0.67                    | -0.17            |
| NHOH                             | -0.04      | -0.34      | -362.728620   | -594.954244       | -0.73                    | -0.24            |
| NO                               | 0.62       | 0.91       | -361.504375   | -593.731438       | -1.64                    | -1.14            |
| NO <sub>2</sub>                  | 0.71       | 0.78       | -436.707528   | -668.935250       | -2.05                    | -1.55            |
| OCF <sub>3</sub>                 | 0.38       | 0.35       | -644.476966   | -876.703897       | -1.55                    | -1.06            |
| OH                               | 0.12       | -0.37      | -307.438898   | -539.664749       | -0.88                    | -0.38            |
| OMe                              | 0.12       | -0.27      | -346.735326   | -578.961134       | -0.85                    | -0.35            |
| SCH <sub>3</sub>                 | 0.15       | 0.00       | -669.696874   | -901.923360       | -1.27                    | -0.78            |
| SH                               | 0.25       | 0.15       | -630.386997   | -862.613579       | -1.33                    | -0.84            |
| SiF <sub>3</sub>                 | 0.54       | 0.69       | -820.841307   | -1053.069084      | -2.08                    | -1.59            |
| SiH <sub>3</sub>                 | 0.05       | 0.10       | -522.884409   | -755.110803       | -1.22                    | -0.72            |
| CH <sub>2</sub> OH               | 0.00       | 0.00       | -346.738076   | -578.963958       | -0.89                    | -0.40            |

Table S2. Absolute energies (hartree) of H-X [E(H-X)] and dimers of H-X with benzene [E(dimer)], interaction energies [E(dimerization), kcal mol<sup>-1</sup>] and interaction energies relative to X = H [E<sub>int</sub>, kcal mol<sup>-1</sup>]

| <b>X</b>                         | <b>E(H-X)</b> | <b>E(dimer)</b> | <b>E(dimerization)</b> | <b>E<sub>int</sub></b> |
|----------------------------------|---------------|-----------------|------------------------|------------------------|
| H                                | -1.163699     | -233.388474     | -0.20                  | 0.00                   |
| BF <sub>2</sub>                  | -225.240810   | -457.466611     | -0.84                  | -0.64                  |
| CCH                              | -77.316621    | -309.542423     | -0.84                  | -0.64                  |
| CF <sub>3</sub>                  | -338.220680   | -570.447153     | -1.27                  | -1.07                  |
| CH <sub>3</sub>                  | -40.499069    | -272.724010     | -0.30                  | -0.10                  |
| CHO                              | -114.481836   | -346.707849     | -0.98                  | -0.78                  |
| CN                               | -93.413125    | -325.640024     | -1.53                  | -1.33                  |
| COCH <sub>3</sub>                | -153.803632   | -386.029709     | -1.02                  | -0.82                  |
| COOCH <sub>3</sub>               | -229.032979   | -461.258931     | -0.94                  | -0.74                  |
| COOH                             | -189.734971   | -421.961156     | -1.08                  | -0.88                  |
| F                                | -100.428751   | -332.654856     | -1.03                  | -0.83                  |
| N(CH <sub>3</sub> ) <sub>2</sub> | -135.124479   | -367.349759     | -0.52                  | -0.32                  |
| NH <sub>2</sub>                  | -56.536241    | -288.761543     | -0.53                  | -0.33                  |
| NHCH <sub>3</sub>                | -95.828806    | -328.054031     | -0.48                  | -0.28                  |
| NHOH                             | -131.686818   | -363.912057     | -0.49                  | -0.29                  |
| NO                               | -130.447410   | -362.674235     | -1.49                  | -1.29                  |
| NO <sub>2</sub>                  | -205.659538   | -437.887183     | -2.00                  | -1.80                  |
| OCF <sub>3</sub>                 | -413.445872   | -645.673029     | -1.70                  | -1.50                  |
| OH                               | -76.404484    | -308.630326     | -0.87                  | -0.67                  |
| OMe                              | -115.694834   | -347.920702     | -0.89                  | -0.69                  |
| SCH <sub>3</sub>                 | -438.655020   | -670.881140     | -1.04                  | -0.84                  |
| SH                               | -399.349570   | -631.575717     | -1.06                  | -0.86                  |
| SiF <sub>3</sub>                 | -589.784606   | -822.011698     | -1.65                  | -1.45                  |
| SiH <sub>3</sub>                 | -291.834836   | -524.060288     | -0.63                  | -0.43                  |
| CH <sub>2</sub> OH               | -115.696172   | -347.921460     | -0.52                  | -0.32                  |

Table S3. Absolute energies (hartree) of substituted dimers  $[E(C_6H_5-X)]$  and dimers of substituted benzenes with perfluorobenzene  $[E(\text{dimer})]$ , interaction energies  $[E(\text{dimerization})]$ , kcal mol<sup>-1</sup>] and interaction energies relative to X = H  $[E_{\text{int}}, \text{kcal mol}^{-1}]$

| <b>X</b>                         | <b>E(C<sub>6</sub>H<sub>5</sub>-X)</b> | <b>E(dimer)</b> | <b>E(dimerization)</b> | <b>E<sub>int</sub></b> |
|----------------------------------|----------------------------------------|-----------------|------------------------|------------------------|
| H                                | -232.224456                            | -1059.814232    | -4.90                  | 0.00                   |
| BF <sub>2</sub>                  | -456.302043                            | -1283.890808    | -4.27                  | 0.63                   |
| CCH                              | -308.367207                            | -1135.956602    | -4.66                  | 0.24                   |
| CF <sub>3</sub>                  | -569.265344                            | -1396.854125    | -4.27                  | 0.62                   |
| CH <sub>3</sub>                  | -271.535226                            | -1099.125677    | -5.32                  | -0.42                  |
| CHO                              | -345.540038                            | -1173.128657    | -4.17                  | 0.73                   |
| CN                               | -324.465127                            | -1152.052859    | -3.62                  | 1.28                   |
| COCH <sub>3</sub>                | -384.857390                            | -1212.446830    | -4.69                  | 0.21                   |
| COOCH <sub>3</sub>               | -460.085848                            | -1287.675132    | -4.59                  | 0.31                   |
| COOH                             | -420.789039                            | -1248.377986    | -4.38                  | 0.52                   |
| F                                | -331.460889                            | -1159.049548    | -4.20                  | 0.70                   |
| N(CH <sub>3</sub> ) <sub>2</sub> | -366.172965                            | -1193.764926    | -6.27                  | -1.37                  |
| NH <sub>2</sub>                  | -287.575100                            | -1115.166126    | -5.68                  | -0.78                  |
| NHCH <sub>3</sub>                | -326.874453                            | -1154.466042    | -6.04                  | -1.14                  |
| NHOH                             | -362.728620                            | -1190.319666    | -5.70                  | -0.80                  |
| NO                               | -361.504375                            | -1189.092384    | -3.79                  | 1.11                   |
| NO <sub>2</sub>                  | -436.707528                            | -1264.295074    | -3.50                  | 1.40                   |
| OCF <sub>3</sub>                 | -644.476966                            | -1472.066300    | -4.62                  | 0.28                   |
| OH                               | -307.438898                            | -1135.029009    | -5.11                  | -0.21                  |
| OMe                              | -346.735326                            | -1174.326179    | -5.58                  | -0.68                  |
| SCH <sub>3</sub>                 | -669.696874                            | -1497.287588    | -5.49                  | -0.59                  |
| SH                               | -630.386997                            | -1457.977054    | -5.08                  | -0.18                  |
| SiF <sub>3</sub>                 | -820.841307                            | -1648.430269    | -4.39                  | 0.51                   |
| SiH <sub>3</sub>                 | -522.884409                            | -1350.474672    | -5.20                  | -0.31                  |
| CH <sub>2</sub> OH               | -346.738076                            | -1174.329011    | -5.63                  | -0.73                  |

Table S4. Absolute energies (hartree) of H-X [E(H-X)] and dimers of H-X with perfluorobenzene [E(dimer)], interaction energies [E(dimerization), kcal mol<sup>-1</sup>] and interaction energies relative to X = H [E<sub>int</sub>, kcal mol<sup>-1</sup>]

| <b>X</b>                         | <b>E(H-X)</b> | <b>E(dimer)</b> | <b>E(dimerization)</b> | <b>E<sub>int</sub></b> |
|----------------------------------|---------------|-----------------|------------------------|------------------------|
| H                                | -1.163699     | -828.746436     | -0.48                  | 0.00                   |
| BF <sub>2</sub>                  | -225.240809   | -1052.823050    | -0.17                  | 0.31                   |
| CCH                              | -77.316622    | -904.899081     | -0.31                  | 0.17                   |
| CF <sub>3</sub>                  | -338.220680   | -1165.802502    | 0.09                   | 0.57                   |
| CH <sub>3</sub>                  | -40.499068    | -868.082123     | -0.68                  | -0.20                  |
| CHO                              | -114.481835   | -942.063843     | -0.02                  | 0.46                   |
| CN                               | -93.413125    | -920.994202     | 0.56                   | 1.04                   |
| COCH <sub>3</sub>                | -153.803631   | -981.386543     | -0.59                  | -0.11                  |
| COOCH <sub>3</sub>               | -229.032978   | -1056.615544    | -0.38                  | 0.11                   |
| COOH                             | -189.734970   | -1017.317158    | -0.14                  | 0.35                   |
| F                                | -100.428752   | -928.009993     | 0.46                   | 0.94                   |
| N(CH <sub>3</sub> ) <sub>2</sub> | -135.124479   | -962.708402     | -1.23                  | -0.74                  |
| NH <sub>2</sub>                  | -56.536241    | -884.119739     | -0.96                  | -0.48                  |
| NHCH <sub>3</sub>                | -95.828806    | -923.412589     | -1.14                  | -0.66                  |
| NHOH                             | -131.686818   | -959.270192     | -0.88                  | -0.40                  |
| NO                               | -130.447409   | -958.029179     | 0.12                   | 0.61                   |
| NO <sub>2</sub>                  | -205.659538   | -1033.240671    | 0.52                   | 1.01                   |
| OCF <sub>3</sub>                 | -413.445872   | -1241.027999    | -0.10                  | 0.38                   |
| OH                               | -76.404484    | -903.987246     | -0.50                  | -0.02                  |
| OMe                              | -115.694834   | -943.278140     | -0.84                  | -0.36                  |
| SCH <sub>3</sub>                 | -438.655019   | -1266.238515    | -0.96                  | -0.48                  |
| SH                               | -399.349570   | -1226.932526    | -0.62                  | -0.14                  |
| SiF <sub>3</sub>                 | -589.784606   | -1417.367073    | -0.31                  | 0.17                   |
| SiH <sub>3</sub>                 | -291.834836   | -1119.418460    | -1.04                  | -0.56                  |
| CH <sub>2</sub> OH               | -115.696171   | -943.279634     | -0.94                  | -0.46                  |

Table S5. Absolute energies (hartree) of F-X [E(F-X)] and dimers of F-X with benzene [E(dimer)], interaction energies [E(dimerization), kcal mol<sup>-1</sup>] and interaction energies relative to X = H [E<sub>int</sub>, kcal mol<sup>-1</sup>]

| <b>X</b>                         | <b>E(F-X)</b> | <b>E(dimer)</b> | <b>E(dimerization)</b> | <b>E<sub>int</sub></b> |
|----------------------------------|---------------|-----------------|------------------------|------------------------|
| H                                | -100.428752   | -332.652418     | 0.50                   | 0.00                   |
| BF <sub>2</sub>                  | -324.555907   | -556.781181     | -0.51                  | -1.01                  |
| CCH                              | -176.525196   | -408.750508     | -0.54                  | -1.03                  |
| CF <sub>3</sub>                  | -437.466218   | -669.691769     | -0.69                  | -1.18                  |
| CH <sub>3</sub>                  | -139.723575   | -371.947622     | 0.26                   | -0.24                  |
| CHO                              | -213.744932   | -445.970122     | -0.46                  | -0.96                  |
| CN                               | -192.618609   | -424.844952     | -1.18                  | -1.68                  |
| COCH <sub>3</sub>                | -253.065306   | -485.290500     | -0.46                  | -0.96                  |
| COOCH <sub>3</sub>               | -328.280768   | -560.505904     | -0.43                  | -0.92                  |
| COOH                             | -288.981585   | -521.206966     | -0.58                  | -1.08                  |
| F                                | -199.479586   | -431.704481     | -0.28                  | -0.77                  |
| N(CH <sub>3</sub> ) <sub>2</sub> | -234.282844   | -466.506950     | 0.22                   | -0.28                  |
| NH <sub>2</sub>                  | -155.680950   | -387.905124     | 0.18                   | -0.32                  |
| NHCH <sub>3</sub>                | -194.981069   | -427.205154     | 0.23                   | -0.26                  |
| NHOH                             | -230.855517   | -463.079604     | 0.23                   | -0.26                  |
| NO                               | -229.672721   | -461.897897     | -0.45                  | -0.95                  |
| NO <sub>2</sub>                  | -304.837221   | -537.063396     | -1.08                  | -1.57                  |
| OCF <sub>3</sub>                 | -512.526356   | -744.752167     | -0.85                  | -1.35                  |
| OH                               | -175.501676   | -407.726113     | 0.01                   | -0.48                  |
| OMe                              | -214.804264   | -447.028594     | 0.08                   | -0.42                  |
| SCH <sub>3</sub>                 | -537.868810   | -770.093520     | -0.16                  | -0.66                  |
| SH                               | -498.551756   | -730.776503     | -0.18                  | -0.68                  |
| SiF <sub>3</sub>                 | -689.098248   | -921.324573     | -1.17                  | -1.67                  |
| SiH <sub>3</sub>                 | -391.143650   | -623.368431     | -0.20                  | -0.70                  |
| CH <sub>2</sub> OH               | -214.935083   | -447.159433     | 0.07                   | -0.43                  |

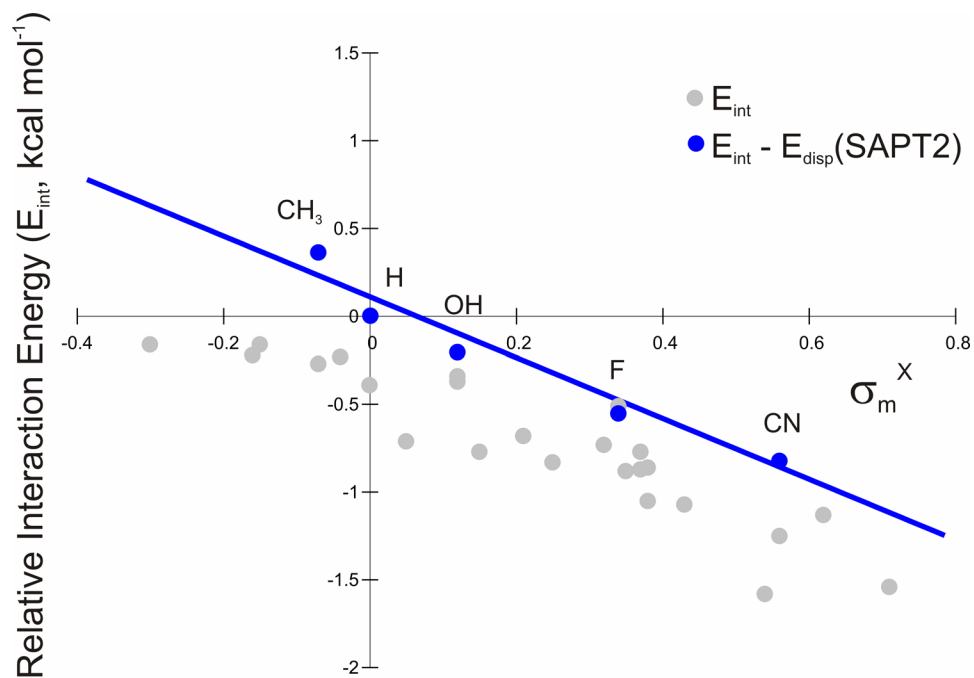

Figure S1.  $E_{\text{int}}(\text{C}_6\text{H}_6 \cdots \text{C}_6\text{H}_5\text{X})$ , relative to X = H (gray), versus  $\sigma_m$  and  $E_{\text{int}}(\text{C}_6\text{H}_6 \cdots \text{C}_6\text{H}_5\text{X}) - E_{\text{disp}}(\text{SAPT2})$  for selected dimers (blue). The SAPT2 dispersion corrections from from Ref. 8

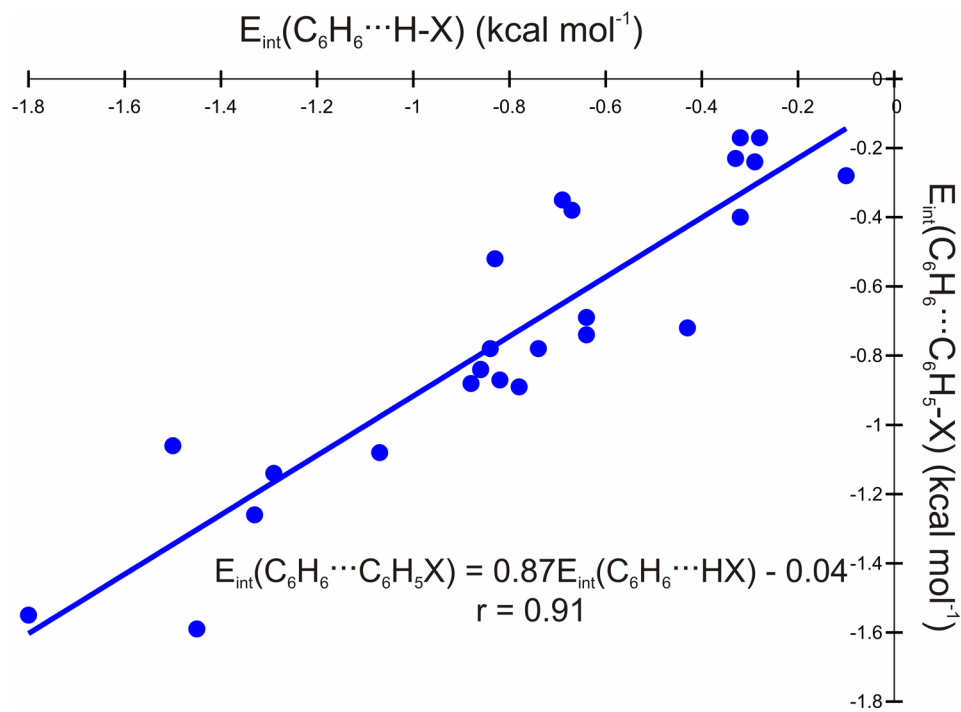

Figure S2. Relative interaction energies of  $\text{C}_6\text{H}_6 \cdots \text{C}_6\text{H}_5\text{X}$  versus  $\text{C}_6\text{H}_6 \cdots \text{HX}$  (kcal mol<sup>-1</sup>)

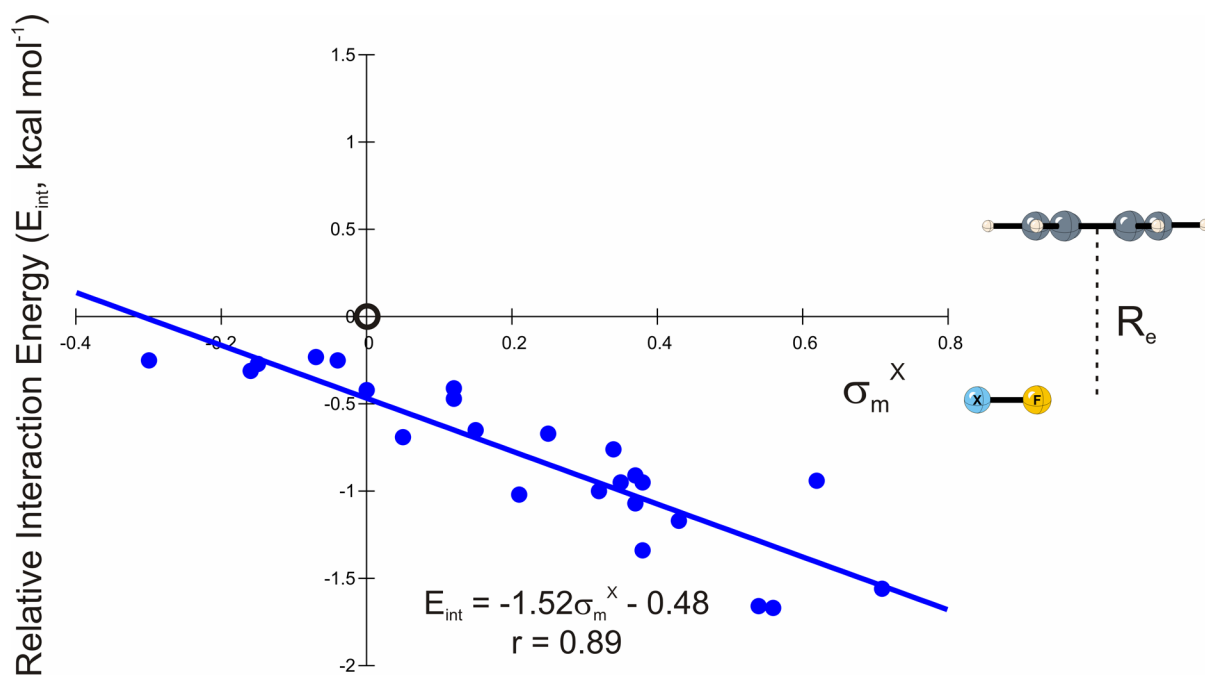

Figure S3. Interaction energies (kcal mol<sup>-1</sup>), relative to the unsubstituted case (X = H), versus  $\sigma_m^X$  for the dimer of F-X and benzene at the equilibrium separation distances ( $R_e$ ) of the corresponding substituted dimers in Fig. 1(a). The open circle at the origin corresponds to X = H, and was not included in the least squares fit.

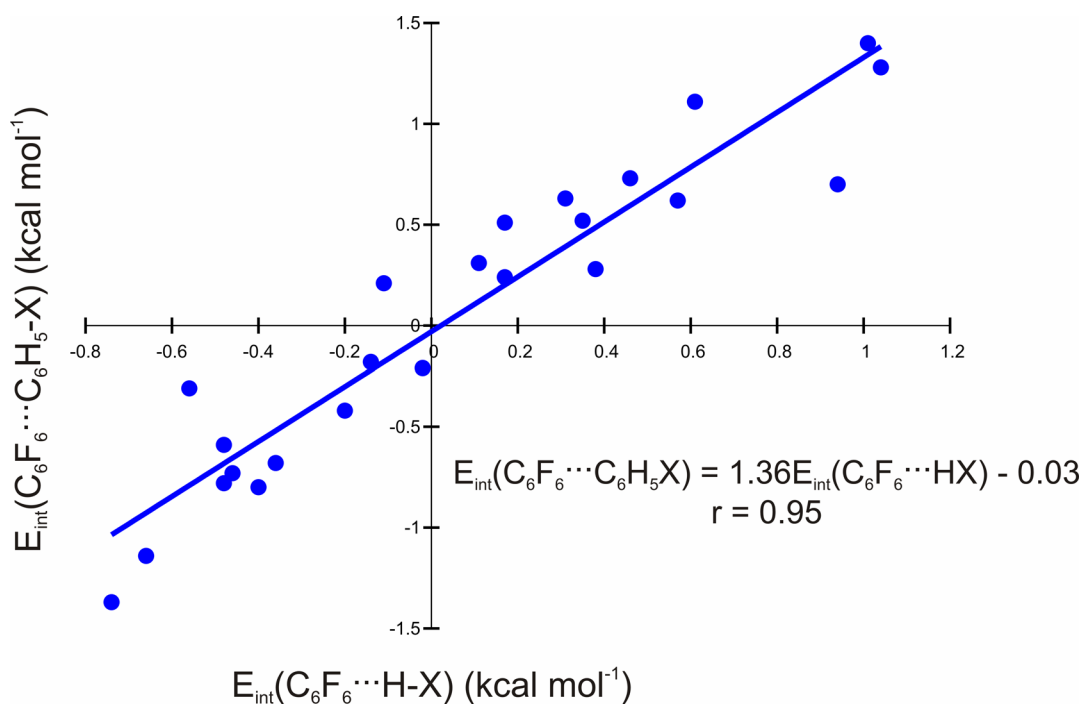

Figure S4. Relative interaction energies of  $\text{C}_6\text{F}_6 \cdots \text{C}_6\text{H}_5\text{X}$  versus  $\text{C}_6\text{F}_6 \cdots \text{HX}$  (kcal mol<sup>-1</sup>)



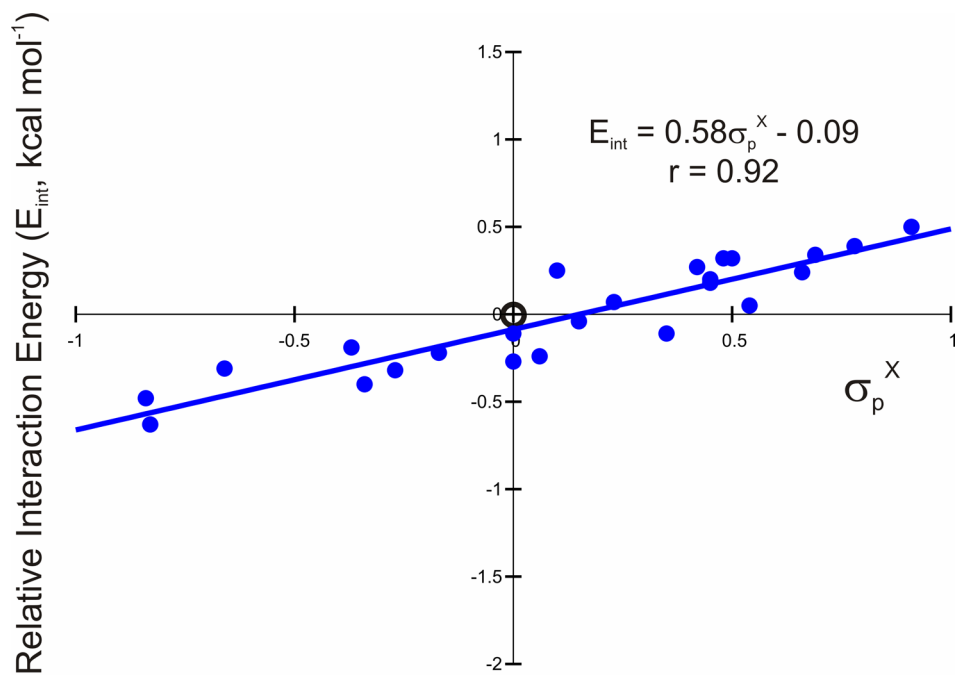

Figure S5. Difference in relative interaction energies (kcal mol<sup>-1</sup>) between C<sub>6</sub>F<sub>6</sub>⋯C<sub>6</sub>H<sub>5</sub>-X and C<sub>6</sub>F<sub>6</sub>⋯H-X vs.  $\sigma_p^X$  [*i.e.*:  $E_{\text{int}}(\text{C}_6\text{F}_6\cdots\text{C}_6\text{H}_5\text{-X}) - E_{\text{int}}(\text{C}_6\text{F}_6\cdots\text{H-X})$  vs.  $\sigma_p^X$ ].

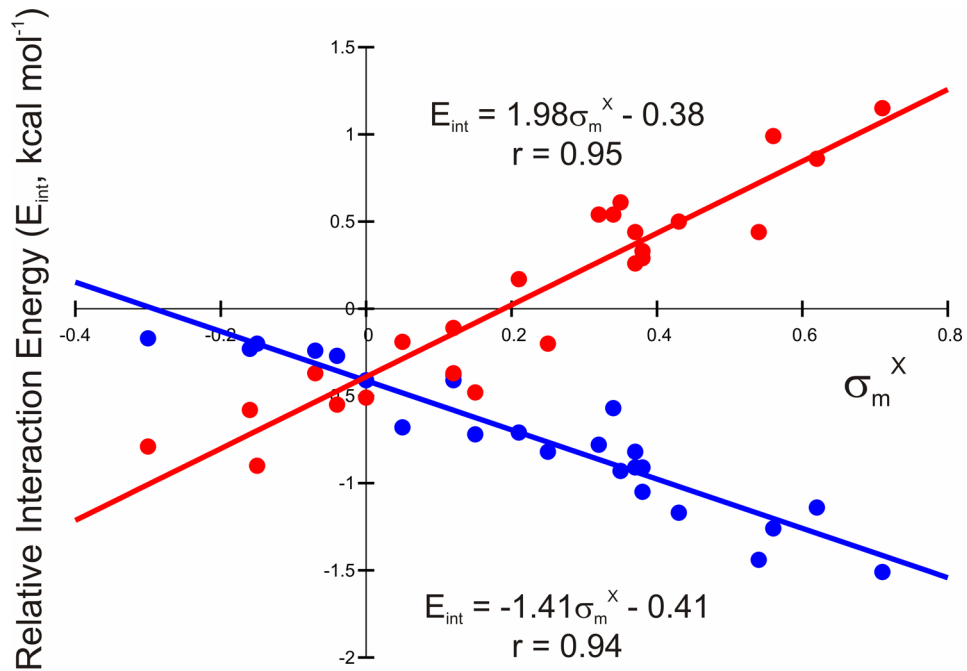

Figure S6. Interaction energies (kcal mol<sup>-1</sup>), relative to X = H, versus  $\sigma_m$  for C<sub>6</sub>H<sub>6</sub>⋯C<sub>6</sub>H<sub>5</sub>X (blue) and C<sub>6</sub>F<sub>6</sub>⋯C<sub>6</sub>H<sub>5</sub>X (red) dimers with inter-ring separations of 4 Å.

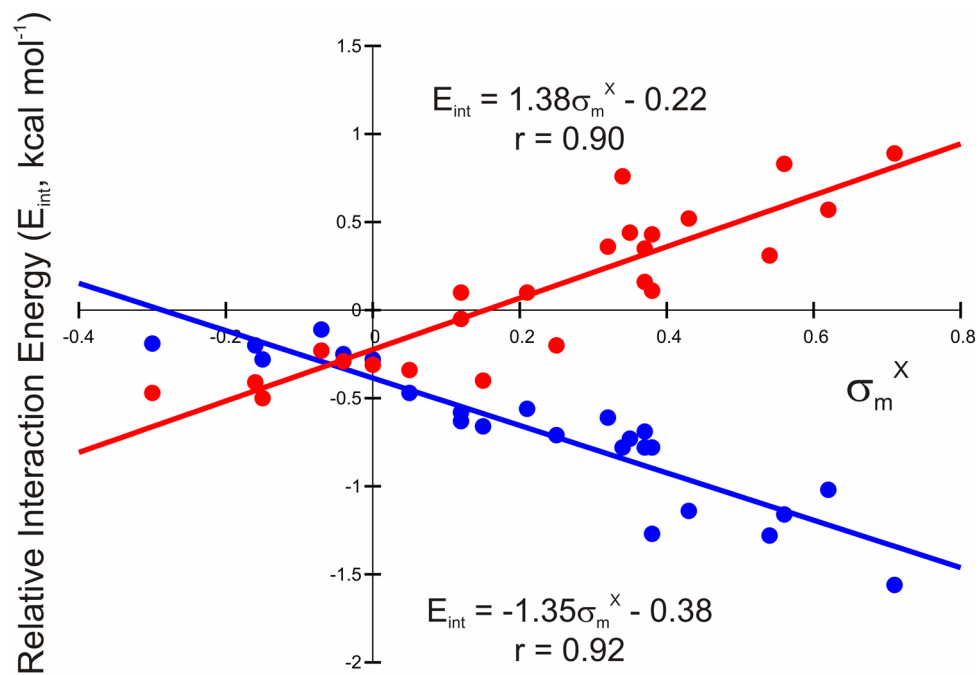

Figure S7. Interaction energies (kcal mol<sup>-1</sup>), relative to X = H, versus  $\sigma_m$  for C<sub>6</sub>H<sub>6</sub>...HX (blue) and C<sub>6</sub>F<sub>6</sub>...HX (red) dimers at 4 Å separations.

## Optimized Cartesian Coordinates (Angstrom)

### C<sub>6</sub>H<sub>5</sub>-X...C<sub>6</sub>H<sub>6</sub> Dimers

|                          |             |             |             |                          |             |             |             |
|--------------------------|-------------|-------------|-------------|--------------------------|-------------|-------------|-------------|
| 24                       |             |             |             |                          |             |             |             |
| C6H5-H...benzene Dimer   |             |             |             | H                        | 0.06334076  | -3.09498310 | 2.14492842  |
| C                        | 0.98556144  | -0.98556144 | -2.02500000 | H                        | -1.87668253 | -1.55530775 | 2.14492842  |
| C                        | -0.36074053 | -1.34630197 | -2.02500000 | H                        | -2.84669418 | -0.78547007 | 0.00000000  |
| C                        | 1.34630197  | 0.36074053  | -2.02500000 | H                        | -1.87668253 | -1.55530775 | -2.14492842 |
| C                        | -0.98556144 | 0.98556144  | -2.02500000 | H                        | 0.06334076  | -3.09498310 | -2.14492842 |
| C                        | 0.36074053  | 1.34630197  | -2.02500000 |                          |             |             |             |
| C                        | -1.34630197 | -0.36074053 | -2.02500000 | 26                       |             |             |             |
| H                        | 1.75143711  | -1.75143711 | -2.02500000 | C6H5-CCH...benzene Dimer |             |             |             |
| H                        | -0.64107047 | -2.39250758 | -2.02500000 | C                        | 0.09484676  | 1.94660902  | 0.00000000  |
| H                        | -2.39250758 | -0.64107047 | -2.02500000 | C                        | -0.53837103 | 1.63628894  | 1.21067500  |
| H                        | -1.75143711 | 1.75143711  | -2.02500000 | C                        | -0.53837103 | 1.63628894  | -1.21067500 |
| H                        | 0.64107047  | 2.39250758  | -2.02500000 | C                        | -2.41371915 | 0.71723995  | 0.00000000  |
| H                        | 2.39250758  | 0.64107047  | -2.02500000 | C                        | -1.78693080 | 1.02440917  | -1.20665700 |
| C                        | 0.98556144  | -0.98556144 | 2.02500000  | C                        | -1.78693080 | 1.02440917  | 1.20665700  |
| C                        | 1.34630197  | 0.36074053  | 2.02500000  | H                        | -0.04457683 | 1.87828191  | -2.14301400 |
| C                        | 0.36074053  | 1.34630197  | 2.02500000  | H                        | -0.04457683 | 1.87828191  | 2.14301400  |
| C                        | -0.98556144 | 0.98556144  | 2.02500000  | H                        | -2.27116346 | 0.78710201  | -2.14584400 |
| C                        | -1.34630197 | -0.36074053 | 2.02500000  | H                        | -2.27116346 | 0.78710201  | 2.14584400  |
| C                        | -0.36074053 | -1.34630197 | 2.02500000  | C                        | 1.38382668  | 2.57829744  | 0.00000000  |
| H                        | 1.75143711  | -1.75143711 | 2.02500000  | C                        | 2.46834871  | 3.10978749  | 0.00000000  |
| H                        | 2.39250758  | 0.64107047  | 2.02500000  | H                        | 3.42529762  | 3.57875798  | 0.00000000  |
| H                        | 0.64107047  | 2.39250758  | 2.02500000  | H                        | -3.38630613 | 0.24060574  | 0.00000000  |
| H                        | -1.75143711 | 1.75143711  | 2.02500000  | C                        | 1.80625058  | -1.55783475 | 0.00000000  |
| H                        | -2.39250758 | -0.64107047 | 2.02500000  | C                        | 1.18046211  | -1.86451395 | 1.20705841  |
| H                        | -0.64107047 | -2.39250758 | 2.02500000  | C                        | -0.07111483 | -2.47787235 | 1.20705841  |
|                          |             |             |             | C                        | -0.69690330 | -2.78455155 | 0.00000000  |
|                          |             |             |             | C                        | -0.07111483 | -2.47787235 | -1.20705841 |
|                          |             |             |             | C                        | 1.18046211  | -1.86451395 | -1.20705841 |
| 26                       |             |             |             | H                        | 2.77871094  | -1.08126259 | 0.00000000  |
| C6H5-BF2...benzene Dimer |             |             |             | H                        | 1.66669229  | -1.62622787 | 2.14492842  |
| C                        | 2.63906847  | -0.09637063 | 0.00000000  | H                        | -0.55734501 | -2.71615843 | 2.14492842  |
| C                        | 2.09595830  | 0.33466200  | -1.20980600 | H                        | -1.66936366 | -3.26112371 | 0.00000000  |
| C                        | 2.09595830  | 0.33466200  | 1.20980600  | H                        | -0.55734501 | -2.71615843 | -2.14492842 |
| C                        | 0.44958877  | 1.64128269  | 0.00000000  | H                        | 1.66669229  | -1.62622787 | -2.14492842 |
| C                        | 1.00627108  | 1.19947870  | 1.20800000  |                          |             |             |             |
| C                        | 1.00627108  | 1.19947870  | -1.20800000 | 27                       |             |             |             |
| H                        | 0.58128242  | 1.53676567  | -2.14609300 | C6H5-CF3...benzene Dimer |             |             |             |
| H                        | 2.52126263  | -0.00287549 | -2.14674300 | C                        | 2.66253612  | -0.35767743 | 0.01137271  |
| H                        | 2.52126263  | -0.00287549 | 2.14674300  | C                        | 2.15188574  | 0.11045137  | -1.19759077 |
| H                        | 0.58128242  | 1.53676567  | 2.14609300  | C                        | 2.11340161  | 0.07354333  | 1.21719416  |
| F                        | -1.30919518 | 3.03711970  | -1.13455100 | C                        | 0.54814834  | 1.43801285  | 0.00512158  |
| F                        | -1.30919518 | 3.03711970  | 1.13455100  | C                        | 1.05213712  | 0.97391367  | 1.21790040  |
| B                        | -0.76116592 | 2.60218309  | 0.00000000  | C                        | 1.09074416  | 1.01093957  | -1.20459788 |
| H                        | 3.48773379  | -0.76990330 | 0.00000000  | H                        | 2.51199927  | -0.28733323 | 2.15672883  |
| C                        | 0.18507718  | -3.19159769 | 0.00000000  | H                        | 2.58038854  | -0.22174483 | -2.13453808 |
| C                        | -0.36079685 | -2.75837156 | 1.20705841  | C                        | -0.62883051 | 2.36661587  | 0.00055806  |
| C                        | -1.45254491 | -1.89191929 | 1.20705841  | F                        | -0.66252585 | 3.14830829  | 1.09781500  |
| C                        | -1.99841894 | -1.45869316 | 0.00000000  | F                        | -1.79973809 | 1.69163874  | -0.02841900 |
| C                        | -1.45254491 | -1.89191929 | -1.20705841 | F                        | -0.62793332 | 3.18148391  | -1.07282136 |
| C                        | -0.36079685 | -2.75837156 | -1.20705841 |                          |             |             |             |
| H                        | 1.03335241  | -3.86482078 | 0.00000000  |                          |             |             |             |

|   |             |             |             |
|---|-------------|-------------|-------------|
| H | 0.62290555  | 1.31798929  | 2.14980044  |
| H | 0.69125129  | 1.38353586  | -2.13875069 |
| H | 3.48986537  | -1.05632829 | 0.01387999  |
| C | 0.23249371  | -3.41654207 | -0.00342213 |
| C | -0.31839876 | -2.98391691 | 1.20157011  |
| C | -1.40862509 | -2.11556037 | 1.19746744  |
| C | -1.94795895 | -1.67982901 | -0.01162748 |
| C | -1.39706648 | -2.11245417 | -1.21661972 |
| C | -0.30684015 | -2.98081070 | -1.21251704 |
| H | 1.07958658  | -4.09124475 | -0.00023440 |
| H | 0.10065722  | -3.32247499 | 2.14102246  |
| H | -1.83666198 | -1.77941578 | 2.13373205  |
| H | -2.79505182 | -1.00512633 | -0.01481521 |
| H | -1.81612246 | -1.77389609 | -2.15607206 |
| H | 0.12119674  | -3.31695530 | -2.14878166 |

27

C6H5-CH3...benzene Dimer

|   |             |             |             |
|---|-------------|-------------|-------------|
| C | 1.99830194  | 1.39680916  | 0.00711381  |
| C | 1.31942083  | 1.56999548  | -1.19701495 |
| C | 1.30803578  | 1.53737669  | 1.20901851  |
| C | -0.74264454 | 2.02005165  | 0.00259398  |
| C | -0.04998621 | 1.84782672  | 1.20362774  |
| C | -0.03863120 | 1.88035936  | -1.19606094 |
| H | 1.82697348  | 1.40985302  | 2.15151503  |
| H | 1.84726958  | 1.46800279  | -2.13767040 |
| C | -2.22053565 | 2.32308166  | -0.00029184 |
| H | -2.50874272 | 2.88361325  | 0.89040859  |
| H | -2.80479608 | 1.39893570  | -0.01558503 |
| H | -2.50037408 | 2.90758990  | -0.87815521 |
| H | -0.58031597 | 1.95932386  | 2.14340845  |
| H | -0.56005943 | 2.01736002  | -2.13744925 |
| H | 3.05507877  | 1.15932682  | 0.00889518  |
| C | 1.19271153  | -2.44230816 | -0.00213543 |
| C | 0.50760630  | -2.30282355 | 1.20361255  |
| C | -0.85698141 | -2.01901561 | 1.20100310  |
| C | -1.53646388 | -1.87469230 | -0.00735434 |
| C | -0.85135864 | -2.01417691 | -1.21310232 |
| C | 0.51322906  | -2.29798485 | -1.21049287 |
| H | 2.25297992  | -2.66282354 | -0.00010792 |
| H | 1.03555608  | -2.41496104 | 2.14249189  |
| H | -1.38930001 | -1.91063773 | 2.13785492  |
| H | -2.59673226 | -1.65417692 | -0.00938185 |
| H | -1.37930842 | -1.90203942 | -2.15198166 |
| H | 1.04554767  | -2.40636273 | -2.14734470 |

26

C6H5-CHO...benzene Dimer

|   |             |            |             |
|---|-------------|------------|-------------|
| C | -0.07616714 | 1.91092754 | -0.21882198 |
| C | 0.33919992  | 1.70317800 | 1.09980759  |
| C | 0.74170767  | 1.53271861 | -1.28416782 |
| C | 2.39194098  | 0.73832066 | 0.27836184  |
| C | 1.97922972  | 0.94477887 | -1.03622490 |
| C | 1.57354746  | 1.11675695 | 1.34586919  |
| H | 0.40773089  | 1.69941136 | -2.30303548 |
| H | -0.31612932 | 2.00661450 | 1.90675128  |

|   |             |             |             |
|---|-------------|-------------|-------------|
| H | 2.61708558  | 0.64975528  | -1.85988990 |
| H | 1.90313474  | 0.95214733  | 2.36412926  |
| C | -1.38936823 | 2.53495912  | -0.49820250 |
| O | -2.16959635 | 2.89713755  | 0.35453920  |
| H | -1.63260554 | 2.65912953  | -1.56860109 |
| H | 3.35418468  | 0.28113650  | 0.47442877  |
| C | 0.70675629  | -2.83405867 | 0.25022485  |
| C | -0.11171615 | -2.45554511 | 1.31299656  |
| C | -1.35030988 | -1.86708486 | 1.06349016  |
| C | -1.77043117 | -1.65713816 | -0.24878795 |
| C | -0.95195873 | -2.03565171 | -1.31155965 |
| C | 0.28663500  | -2.62411197 | -1.06205325 |
| H | 1.66912886  | -3.29128528 | 0.44408835  |
| H | 0.21471309  | -2.61867120 | 2.33262102  |
| H | -1.98625322 | -1.57298434 | 1.88925112  |
| H | -2.73280375 | -1.19991155 | -0.44265145 |
| H | -1.27838797 | -1.87252563 | -2.33118411 |
| H | 0.92257833  | -2.91821249 | -1.88781421 |

25

C6H5-CN...benzene Dimer

|   |             |             |             |
|---|-------------|-------------|-------------|
| C | 2.39460020  | 0.67372350  | 0.00000000  |
| C | 1.77567472  | 0.98778601  | 1.20898600  |
| C | 1.77567472  | 0.98778601  | -1.20898600 |
| C | -0.08143169 | 1.93014095  | 0.00000000  |
| C | 0.53596888  | 1.61685223  | -1.21523800 |
| C | 0.53596888  | 1.61685223  | 1.21523800  |
| C | -1.36537242 | 2.58165337  | 0.00000000  |
| N | -2.39641699 | 3.10483822  | 0.00000000  |
| H | 2.25810021  | 0.74298795  | 2.14648100  |
| H | 2.25810021  | 0.74298795  | -2.14648100 |
| H | 0.04365020  | 1.86667041  | -2.14582200 |
| H | 0.04365020  | 1.86667041  | 2.14582200  |
| H | 3.36022077  | 0.18373687  | 0.00000000  |
| C | 0.65684914  | -2.76178892 | 0.00000000  |
| C | 0.03538525  | -2.44643835 | 1.20705841  |
| C | -1.20754251 | -1.81573722 | 1.20705841  |
| C | -1.82900639 | -1.50038665 | 0.00000000  |
| C | -1.20754251 | -1.81573722 | -1.20705841 |
| C | 0.03538525  | -2.44643835 | -1.20705841 |
| H | 1.62258920  | -3.25183619 | 0.00000000  |
| H | 0.51825529  | -2.69146199 | 2.14492842  |
| H | -1.69041254 | -1.57071358 | 2.14492842  |
| H | -2.79474646 | -1.01033938 | 0.00000000  |
| H | -1.69041254 | -1.57071358 | -2.14492842 |
| H | 0.51825529  | -2.69146199 | -2.14492842 |

29

C6H5-COCH3...benzene Dimer

|   |            |             |             |
|---|------------|-------------|-------------|
| C | 0.32943943 | -1.67336409 | 0.03326836  |
| C | 0.94138238 | -1.26399362 | 1.22233783  |
| C | 0.87600445 | -1.28552473 | -1.19295368 |
| C | 2.62742808 | -0.09202076 | -0.04218091 |
| C | 2.02300250 | -0.49623241 | -1.23003349 |
| C | 2.08538358 | -0.47675933 | 1.18492020  |
| H | 0.41436347 | -1.59403464 | -2.12225630 |

|   |             |             |             |
|---|-------------|-------------|-------------|
| H | 0.50216151  | -1.57521040 | 2.16117354  |
| H | 2.44245965  | -0.19847427 | -2.18281435 |
| H | 2.55588774  | -0.16209299 | 2.10802797  |
| C | -0.90229459 | -2.52147200 | 0.12519039  |
| O | -1.35281766 | -2.84186574 | 1.20861375  |
| C | -1.57354078 | -2.97076629 | -1.15315899 |
| H | -0.88689450 | -3.56444067 | -1.76094553 |
| H | -1.88778448 | -2.10928596 | -1.74682507 |
| H | -2.44212212 | -3.57073168 | -0.89197086 |
| H | 3.51932623  | 0.52173237  | -0.07148838 |
| C | -1.90577056 | 1.58321921  | 0.06515733  |
| C | -1.29952451 | 1.98868415  | 1.25289353  |
| C | -0.15174649 | 2.77851883  | 1.21520883  |
| C | 0.38978549  | 3.16288857  | -0.01021206 |
| C | -0.21646055 | 2.75742363  | -1.19794826 |
| C | -1.36423858 | 1.96758895  | -1.16026356 |
| H | -2.79758041 | 0.96952708  | 0.09443790  |
| H | -1.72028841 | 1.69003344  | 2.20503096  |
| H | 0.31929947  | 3.09356025  | 2.13806570  |
| H | 1.28159534  | 3.77658070  | -0.03949263 |
| H | 0.20430334  | 3.05607434  | -2.15008569 |
| H | -1.83528453 | 1.65254753  | -2.08312043 |

30

|                             |             |             |             |
|-----------------------------|-------------|-------------|-------------|
| C6H5-COOCH3...benzene Dimer |             |             |             |
| C                           | 0.81428427  | -1.26317906 | -0.09942825 |
| C                           | 1.42417504  | -0.66590785 | -1.20411451 |
| C                           | 1.14414193  | -0.85521257 | 1.19463992  |
| C                           | 2.69577065  | 0.74928971  | 0.27673387  |
| C                           | 2.08627614  | 0.15233459  | 1.37909979  |
| C                           | 2.36475926  | 0.34021442  | -1.01477527 |
| H                           | 0.66540566  | -1.32488896 | 2.04292918  |
| H                           | 1.14957218  | -1.00168814 | -2.19572962 |
| H                           | 2.34450290  | 0.47121841  | 2.38124139  |
| H                           | 2.83895957  | 0.80475580  | -1.87028038 |
| C                           | -0.18574265 | -2.33542663 | -0.35731713 |
| O                           | -0.50358844 | -2.72206935 | -1.46022491 |
| O                           | -0.71051073 | -2.84135077 | 0.77103399  |
| C                           | -1.68090234 | -3.87939461 | 0.57486495  |
| H                           | -1.99751023 | -4.17044359 | 1.57164812  |
| H                           | -2.51988734 | -3.49966255 | -0.00520921 |
| H                           | -1.22771634 | -4.71795711 | 0.04949492  |
| H                           | 3.42867081  | 1.53324149  | 0.42392296  |
| C                           | -2.06087520 | 1.44256955  | -0.22147764 |
| C                           | -1.72818041 | 1.85334740  | 1.06818475  |
| C                           | -0.78506182 | 2.86212255  | 1.25674072  |
| C                           | -0.17463802 | 3.46011986  | 0.15563430  |
| C                           | -0.50733281 | 3.04934202  | -1.13402809 |
| C                           | -1.45045140 | 2.04056686  | -1.32258406 |
| H                           | -2.79366711 | 0.65876327  | -0.36798339 |
| H                           | -2.20247243 | 1.38871061  | 1.92373132  |
| H                           | -0.52656193 | 3.18129205  | 2.25879303  |
| H                           | 0.55815389  | 4.24392614  | 0.30214004  |
| H                           | -0.03304079 | 3.51397880  | -1.98957467 |
| H                           | -1.70895129 | 1.72139737  | -2.32463638 |

27

|                           |             |             |             |
|---------------------------|-------------|-------------|-------------|
| C6H5-COOH...benzene Dimer |             |             |             |
| C                         | 2.60443401  | 0.04060334  | -0.02192153 |
| C                         | 2.02222871  | 0.45408160  | -1.21904577 |
| C                         | 2.05656502  | 0.43307132  | 1.19929623  |
| C                         | 0.34324945  | 1.65323138  | 0.02400422  |
| C                         | 0.92516202  | 1.23996598  | 1.22397883  |
| C                         | 0.88940498  | 1.26198119  | -1.20010718 |
| H                         | 2.44978881  | 0.14780718  | -2.16524517 |
| H                         | 2.51081156  | 0.11046004  | 2.12742469  |
| H                         | 0.42886575  | 1.58908888  | -2.12212593 |
| H                         | 0.47954720  | 1.55909719  | 2.15701891  |
| C                         | -0.86361877 | 2.51401816  | 0.10027606  |
| O                         | -1.38457792 | 2.88701517  | 1.12655915  |
| O                         | -1.34942934 | 2.85873132  | -1.11164493 |
| H                         | -2.12847178 | 3.41453694  | -0.95019838 |
| H                         | 3.48601910  | -0.58812470 | -0.04022801 |
| C                         | 0.34368339  | -3.13729016 | -0.01744562 |
| C                         | -0.20655449 | -2.74313684 | 1.20096924  |
| C                         | -1.34116776 | -1.93395514 | 1.22401379  |
| C                         | -1.92554315 | -1.51892676 | 0.02864347  |
| C                         | -1.37530527 | -1.91308008 | -1.18977139 |
| C                         | -0.24069200 | -2.72226178 | -1.21281594 |
| H                         | 1.22526438  | -3.76601470 | -0.03535096 |
| H                         | 0.24749822  | -3.06560894 | 2.12975774  |
| H                         | -1.76869604 | -1.62770270 | 2.17070763  |
| H                         | -2.80712414 | -0.89020221 | 0.04654881  |
| H                         | -1.82935799 | -1.59060797 | -2.11855989 |
| H                         | 0.18683627  | -3.02851422 | -2.15950977 |

24

|                        |             |             |             |
|------------------------|-------------|-------------|-------------|
| C6H5-F...benzene Dimer |             |             |             |
| C                      | 0.70908851  | 2.00325917  | 0.00000000  |
| C                      | 0.06314069  | 1.86063520  | 1.21658000  |
| C                      | 0.06314069  | 1.86063520  | -1.21658000 |
| C                      | -1.97938639 | 1.40964937  | 0.00000000  |
| C                      | -1.29733710 | 1.56024447  | -1.20644900 |
| C                      | -1.29733710 | 1.56024447  | 1.20644900  |
| F                      | 2.03096993  | 2.29512791  | 0.00000000  |
| H                      | 0.61967023  | 1.98351579  | 2.13600000  |
| H                      | 0.61967023  | 1.98351579  | -2.13600000 |
| H                      | -1.82391309 | 1.44397756  | -2.14537100 |
| H                      | -1.82391309 | 1.44397756  | 2.14537100  |
| H                      | -3.03611913 | 1.17632492  | 0.00000000  |
| C                      | 1.58953425  | -1.84747914 | 0.00000000  |
| C                      | 0.90902926  | -1.99773326 | 1.20705841  |
| C                      | -0.45198071 | -2.29824150 | 1.20705841  |
| C                      | -1.13248570 | -2.44849562 | 0.00000000  |
| C                      | -0.45198071 | -2.29824150 | -1.20705841 |
| C                      | 0.90902926  | -1.99773326 | -1.20705841 |
| H                      | 2.64702278  | -1.61398782 | 0.00000000  |
| H                      | 1.43777353  | -1.88098760 | 2.14492842  |
| H                      | -0.98072498 | -2.41498716 | 2.14492842  |
| H                      | -2.18997423 | -2.68198694 | 0.00000000  |
| H                      | -0.98072498 | -2.41498716 | -2.14492842 |
| H                      | 1.43777353  | -1.88098760 | -2.14492842 |

32

C6H5-NCH3\_2...benzene Dimer

|   |             |             |             |
|---|-------------|-------------|-------------|
| C | 0.25126059  | -1.60566063 | 0.00000000  |
| C | 0.86881044  | -1.21431890 | 1.20480800  |
| C | 0.86881044  | -1.21431890 | -1.20480800 |
| C | 2.62203860  | -0.05073878 | 0.00000000  |
| C | 2.02854032  | -0.44711079 | -1.19537800 |
| C | 2.02854032  | -0.44711079 | 1.19537800  |
| H | 0.44757517  | -1.50308136 | 2.15666650  |
| H | 2.47276271  | -0.16204554 | 2.14181049  |
| H | 2.47276271  | -0.16204554 | -2.14181049 |
| H | 0.44757517  | -1.50308136 | -2.15666650 |
| N | -0.92754448 | -2.34099153 | 0.00000000  |
| C | -1.32491078 | -2.98916826 | -1.23492798 |
| H | -2.24434978 | -3.54390735 | -1.05913547 |
| H | -1.53186779 | -2.24849395 | -2.00861248 |
| H | -0.56074889 | -3.68305886 | -1.61084497 |
| C | -1.32491078 | -2.98916826 | 1.23492798  |
| H | -1.53186779 | -2.24849395 | 2.00861248  |
| H | -2.24434978 | -3.54390735 | 1.05913547  |
| H | -0.56074889 | -3.68305886 | 1.61084497  |
| C | 3.52624029  | 0.54397292  | 0.00000000  |
| H | -1.88712797 | 1.70868571  | 0.00000000  |
| C | -1.30438835 | 2.09088707  | 1.20705841  |
| C | -0.13890911 | 2.85528978  | 1.20705841  |
| C | 0.44383050  | 3.23749113  | 0.00000000  |
| C | -0.13890911 | 2.85528978  | -1.20705841 |
| C | -1.30438835 | 2.09088707  | -1.20705841 |
| H | -2.79269145 | 1.11475392  | 0.00000000  |
| H | -1.75717009 | 1.79392117  | 2.14492842  |
| H | 0.31387263  | 3.15225567  | 2.14492842  |
| H | 1.34939398  | 3.83142292  | 0.00000000  |
| H | 0.31387263  | 3.15225567  | -2.14492842 |
| H | -1.75717009 | 1.79392117  | -2.14492842 |

26

C6H5-NH2...benzene Dimer

|   |             |             |             |
|---|-------------|-------------|-------------|
| C | -0.75640823 | -1.95874583 | 0.00000000  |
| C | -0.05958644 | -1.80713175 | -1.20529550 |
| C | -0.05958644 | -1.80713175 | 1.20529550  |
| C | 1.99359430  | -1.36820436 | 0.00000000  |
| C | 1.30019429  | -1.51611293 | 1.19985750  |
| C | 1.30019429  | -1.51611293 | -1.19985750 |
| H | -0.59022184 | -1.91222054 | 2.14520650  |
| H | 1.82079752  | -1.40602759 | 2.14355150  |
| H | 1.82079752  | -1.40602759 | -2.14355150 |
| H | -0.59022184 | -1.91222054 | -2.14520650 |
| H | -2.48756796 | -2.63868091 | 0.83449000  |
| H | -2.48756796 | -2.63868091 | -0.83449000 |
| N | -2.13251336 | -2.19770111 | 0.00000000  |
| H | 3.05219712  | -1.14336414 | 0.00000000  |
| C | -1.55132059 | 1.80931242  | 0.00000000  |
| C | -0.86995827 | 1.95562963  | 1.20705841  |
| C | 0.49276637  | 2.24826405  | 1.20705841  |
| C | 1.17412869  | 2.39458126  | 0.00000000  |
| C | 0.49276637  | 2.24826405  | -1.20705841 |

|   |             |            |             |
|---|-------------|------------|-------------|
| C | -0.86995827 | 1.95562963 | -1.20705841 |
| H | -2.61014139 | 1.58193895 | 0.00000000  |
| H | -1.39936867 | 1.84194290 | 2.14492842  |
| H | 1.02217678  | 2.36195078 | 2.14492842  |
| H | 2.23294950  | 2.62195473 | 0.00000000  |
| H | 1.02217678  | 2.36195078 | -2.14492842 |
| H | -1.39936867 | 1.84194290 | -2.14492842 |

29

C6H5-NHCH3...benzene Dimer

|   |             |             |             |
|---|-------------|-------------|-------------|
| C | -0.02062998 | -1.81908963 | -0.27186531 |
| C | 0.37387746  | -1.61115596 | 1.05724234  |
| C | 0.83859759  | -1.39458139 | -1.30065758 |
| C | 2.43634561  | -0.56998813 | 0.31823753  |
| C | 2.04723370  | -0.78208407 | -1.00621101 |
| C | 1.58942937  | -0.98861318 | 1.33842495  |
| H | 0.54113766  | -1.54242960 | -2.33344269 |
| H | 2.69116202  | -0.46528812 | -1.81802154 |
| H | 1.87249485  | -0.83603899 | 2.37320882  |
| H | -0.26182672 | -1.92854415 | 1.87283017  |
| N | -1.24007379 | -2.39844291 | -0.59495725 |
| H | -1.27126793 | -2.80123954 | -1.51720819 |
| C | -2.00595393 | -3.10829863 | 0.40818750  |
| H | -2.86265569 | -3.57419235 | -0.07580422 |
| H | -2.38626510 | -2.41060667 | 1.15649378  |
| H | -1.42150998 | -3.88349532 | 0.91954015  |
| H | 3.37960083  | -0.09043365 | 0.54544008  |
| C | -1.76619496 | 1.66721694  | -0.29699366 |
| C | -1.38796890 | 1.86934951  | 1.02918159  |
| C | -0.17305376 | 2.48700006  | 1.32097321  |
| C | 0.66363532  | 2.90251804  | 0.28658956  |
| C | 0.28540926  | 2.70038548  | -1.03958570 |
| C | -0.92950588 | 2.08273493  | -1.33137731 |
| H | -2.71016955 | 1.18730982  | -0.52371227 |
| H | -2.03806635 | 1.54649698  | 1.83288537  |
| H | 0.12082338  | 2.64405465  | 2.35139559  |
| H | 1.60760991  | 3.38242516  | 0.51330817  |
| H | 0.93550671  | 3.02323800  | -1.84328947 |
| H | -1.22338302 | 1.92568033  | -2.36179969 |

27

C6H5-NHOH...benzene Dimer

|   |             |            |             |
|---|-------------|------------|-------------|
| C | 2.42121109  | 0.62619501 | -0.32694698 |
| C | 2.03797777  | 0.82483272 | 0.99987970  |
| C | 1.57044070  | 1.04108721 | -1.34684510 |
| C | -0.02680684 | 1.84082408 | 0.26807179  |
| C | 0.34839794  | 1.64813919 | -1.06049190 |
| C | 0.82225914  | 1.42575979 | 1.30000701  |
| H | 0.52122118  | 1.56539795 | 2.33273383  |
| H | 2.68798824  | 0.50889808 | 1.80687350  |
| H | 1.85724078  | 0.89840791 | -2.38183991 |
| H | -0.30308794 | 1.98460824 | -1.85378082 |
| N | -1.28335809 | 2.38589923 | 0.62647735  |
| H | -1.18628882 | 3.03967970 | 1.39446273  |
| O | -1.87155144 | 3.11311195 | -0.42575542 |
| H | -2.70955639 | 2.65931823 | -0.58007228 |

|   |             |             |             |
|---|-------------|-------------|-------------|
| H | 3.36891687  | 0.15723186  | -0.55890568 |
| C | 0.66469778  | -2.91151865 | -0.29988022 |
| C | 0.28813658  | -2.71617338 | 1.02778512  |
| C | -0.93183249 | -2.11086331 | 1.32431256  |
| C | -1.77524037 | -1.70089851 | 0.29317467  |
| C | -1.39867918 | -1.89624377 | -1.03449066 |
| C | -0.17871010 | -2.50155384 | -1.33101811 |
| H | 1.61259921  | -3.38183736 | -0.53027850 |
| H | 0.94345446  | -3.03471115 | 1.82896698  |
| H | -1.22441606 | -1.95908237 | 2.35589271  |
| H | -2.72314181 | -1.23057979 | 0.52357296  |
| H | -2.05399705 | -1.57770600 | -1.83567253 |
| H | 0.11387346  | -2.65333479 | -2.36259826 |

|   |             |             |             |
|---|-------------|-------------|-------------|
| N | 0.90109843  | 2.48413941  | 0.00000000  |
| H | -3.45213298 | -0.54175933 | 0.00000000  |
| C | 1.91474329  | -1.49999825 | 0.00000000  |
| C | 1.34250807  | -1.89775469 | 1.20705841  |
| C | 0.19803762  | -2.69326758 | 1.20705841  |
| C | -0.37419760 | -3.09102402 | 0.00000000  |
| C | 0.19803762  | -2.69326758 | -1.20705841 |
| C | 1.34250807  | -1.89775469 | -1.20705841 |
| H | 2.80398319  | -0.88189422 | 0.00000000  |
| H | 1.78712802  | -1.58870268 | 2.14492842  |
| H | -0.24658233 | -3.00231959 | 2.14492842  |
| H | -1.26343750 | -3.70912805 | 0.00000000  |
| H | -0.24658233 | -3.00231959 | -2.14492842 |
| H | 1.78712802  | -1.58870268 | -2.14492842 |

25

C6H5-NO...benzene Dimer

|   |             |             |             |
|---|-------------|-------------|-------------|
| C | -0.07782611 | -1.85902425 | -0.21588508 |
| C | 0.71803550  | -1.47475866 | -1.29186253 |
| C | 0.32327913  | -1.64670096 | 1.10528788  |
| C | 2.35469424  | -0.64678256 | 0.26559770  |
| C | 1.54711494  | -1.03688417 | 1.33960237  |
| C | 1.94469384  | -0.86344696 | -1.04816962 |
| H | -0.32410962 | -1.95994981 | 1.91358339  |
| H | 0.36039725  | -1.66234094 | -2.29688237 |
| H | 1.87932263  | -0.86181992 | 2.35509377  |
| H | 2.57589580  | -0.55839656 | -1.87283160 |
| N | -1.32568230 | -2.48200531 | -0.57418109 |
| O | -2.01168044 | -2.81315415 | 0.36039747  |
| H | 3.30836620  | -0.17147552 | 0.45900813  |
| C | -1.78278431 | 1.53687845  | -0.25144955 |
| C | -1.36196338 | 1.75887677  | 1.05861909  |
| C | -0.13362198 | 2.37101828  | 1.30175179  |
| C | 0.67389851  | 2.76116147  | 0.23481584  |
| C | 0.25307758  | 2.53916316  | -1.07525280 |
| C | -0.97526383 | 1.92702165  | -1.31838549 |
| H | -2.73719095 | 1.06125180  | -0.44036076 |
| H | -1.98939718 | 1.45574016  | 1.88761561  |
| H | 0.19335087  | 2.54350833  | 2.31965952  |
| H | 1.62830514  | 3.23678813  | 0.42372705  |
| H | 0.88051137  | 2.84229977  | -1.90424932 |
| H | -1.30223668 | 1.75453160  | -2.33629322 |

26

C6H5-NO2...benzene Dimer

|   |             |            |             |
|---|-------------|------------|-------------|
| C | -0.30650962 | 1.64474005 | 0.00000000  |
| C | -0.85226001 | 1.26539301 | -1.21951500 |
| C | -0.85226001 | 1.26539301 | 1.21951500  |
| C | -2.56322810 | 0.07611184 | 0.00000000  |
| C | -1.99427038 | 0.47159011 | -1.21000200 |
| C | -1.99427038 | 0.47159011 | 1.21000200  |
| H | -2.43871173 | 0.16266223 | -2.14716400 |
| H | -0.38783093 | 1.58821420 | -2.13988900 |
| H | -0.38783093 | 1.58821420 | 2.13988900  |
| H | -2.43871173 | 0.16266223 | 2.14716400  |
| O | 1.36392878  | 2.80584934 | -1.07799600 |
| O | 1.36392878  | 2.80584934 | 1.07799600  |

28

C6H5-OCF3...benzene Dimer

|   |             |             |             |
|---|-------------|-------------|-------------|
| C | 0.94324845  | -0.90617515 | -0.36872532 |
| C | 1.55812456  | -0.14627576 | -1.35633656 |
| C | 1.15023372  | -0.65459745 | 0.98145595  |
| C | 2.62772834  | 1.16696511  | 0.36417320  |
| C | 2.00122058  | 0.39277971  | 1.33501445  |
| C | 2.40238918  | 0.89277390  | -0.98411252 |
| H | 0.67216325  | -1.24542159 | 1.74816424  |
| H | 1.36536819  | -0.38110909 | -2.39475496 |
| H | 2.16917142  | 0.59702845  | 2.38480481  |
| H | 2.88352818  | 1.48737647  | -1.75023505 |
| C | -0.54646396 | -2.74206428 | -0.03949544 |
| O | 0.11906386  | -1.92017329 | -0.86693758 |
| F | -1.40634477 | -2.08778277 | 0.76230325  |
| F | 0.27254427  | -3.45071309 | 0.75887968  |
| F | -1.24257509 | -3.59768299 | -0.78277825 |
| H | 3.28531370  | 1.97626654  | 0.65375311  |
| C | -2.05616833 | 1.50759589  | -0.36744030 |
| C | -1.83222467 | 1.78006773  | 0.98098903  |
| C | -0.98461730 | 2.82324371  | 1.34976943  |
| C | -0.36095360 | 3.59394786  | 0.37012048  |
| C | -0.58489726 | 3.32147602  | -0.97830886 |
| C | -1.43250463 | 2.27830004  | -1.34708925 |
| H | -2.71474915 | 0.69706059  | -0.65397827 |
| H | -2.31680393 | 1.18123980  | 1.74216460  |
| H | -0.81061574 | 3.03495109  | 2.39748296  |
| H | 0.29762722  | 4.40448317  | 0.65665845  |
| H | -0.10031799 | 3.92030396  | -1.73948442 |
| H | -1.60650618 | 2.06659267  | -2.39480278 |

25

C6H5-OH...benzene Dimer

|   |             |             |             |
|---|-------------|-------------|-------------|
| C | -0.75082593 | -1.97830694 | 0.00211294  |
| C | -0.07496521 | -1.83581517 | 1.21300112  |
| C | -0.07112111 | -1.83447740 | -1.20587506 |
| C | 1.97806025  | -1.40191339 | 0.00479676  |
| C | 1.29244022  | -1.54646834 | -1.19776101 |
| C | 1.28494658  | -1.54857389 | 1.20701157  |
| H | -0.60192575 | -1.94638940 | -2.14581347 |
| H | 1.81560087  | -1.43576180 | -2.13977687 |

|   |             |             |             |   |             |             |             |
|---|-------------|-------------|-------------|---|-------------|-------------|-------------|
| H | 1.80729635  | -1.43844830 | 2.14956067  | C | 1.87821915  | -0.39967740 | 1.35128989  |
| H | -0.62753971 | -1.95273041 | 2.13626604  | H | 0.24727598  | -1.65305642 | 1.94531648  |
| O | -2.08679922 | -2.26050340 | 0.06081505  | H | 2.14412111  | -0.16529320 | 2.37515109  |
| H | -2.44612490 | -2.33620604 | -0.83147169 | H | 2.81048873  | 0.24027430  | -1.84228033 |
| H | 3.03702321  | -1.17824021 | 0.00715424  | H | 0.90364704  | -1.25564007 | -2.28596424 |
| C | -1.55992017 | 1.83684381  | 0.00336936  | S | -0.90805499 | -2.62178108 | -0.65043288 |
| C | -0.87915232 | 1.98037276  | 1.21109777  | C | -1.58234629 | -3.10346780 | 0.95714979  |
| C | 0.48455011  | 2.26841309  | 1.21243895  | H | -1.94812600 | -2.23911314 | 1.51076025  |
| C | 1.16748469  | 2.41292448  | 0.00605172  | H | -0.84915914 | -3.65119164 | 1.54860859  |
| C | 0.48671684  | 2.26939553  | -1.20167669 | H | -2.42170123 | -3.76254687 | 0.73922434  |
| C | -0.87698559 | 1.98135520  | -1.20301787 | H | 3.44718778  | 0.79847608  | 0.49635760  |
| H | -2.61950071 | 1.61303990  | 0.00232728  | C | -1.91733098 | 1.48214537  | -0.28649766 |
| H | -1.40978436 | 1.86808913  | 2.14844629  | C | -1.56513505 | 1.79142840  | 1.02611629  |
| H | 1.01349861  | 2.37993338  | 2.15082955  | C | -0.48648223 | 2.63763542  | 1.27730368  |
| H | 2.22706523  | 2.63672839  | 0.00709380  | C | 0.23997468  | 3.17455942  | 0.21587712  |
| H | 1.01734888  | 2.38167916  | -2.13902521 | C | -0.11222125 | 2.86527639  | -1.09673683 |
| H | -1.40593409 | 1.86983492  | -2.14140847 | C | -1.19087408 | 2.01906937  | -1.34792422 |

28

|                          |             |             |             |
|--------------------------|-------------|-------------|-------------|
| C6H5-OMe...benzene Dimer |             |             |             |
| C                        | -0.05556317 | -1.86154030 | -0.25239338 |
| C                        | 0.33528705  | -1.66202812 | 1.07184166  |
| C                        | 0.79072406  | -1.47762295 | -1.29806258 |
| C                        | 2.42235376  | -0.69297672 | 0.30449447  |
| C                        | 2.01892671  | -0.89835902 | -1.01760166 |
| C                        | 1.57627967  | -1.07695751 | 1.33686808  |
| H                        | -0.30259440 | -1.95097073 | 1.89514028  |
| H                        | 1.87399383  | -0.92472030 | 2.36727869  |
| H                        | 2.66688279  | -0.60461363 | -1.83442973 |
| H                        | 0.46013800  | -1.64510699 | -2.31508497 |
| O                        | -1.24016538 | -2.42150876 | -0.62610690 |
| C                        | -2.12958190 | -2.82589624 | 0.39922891  |
| H                        | -2.43350843 | -1.97346764 | 1.01201121  |
| H                        | -1.67459725 | -3.59220230 | 1.03189944  |
| H                        | -2.99806807 | -3.23927669 | -0.10606516 |
| H                        | 3.38151702  | -0.24062926 | 0.52124524  |
| C                        | -1.73068714 | 1.71539130  | -0.29738154 |
| C                        | -1.33629739 | 1.91653066  | 1.02422848  |
| C                        | -0.10091972 | 2.49912372  | 1.30186256  |
| C                        | 0.74006821  | 2.88057741  | 0.25788664  |
| C                        | 0.34567846  | 2.67943804  | -1.06372337 |
| C                        | -0.88969921 | 2.09684499  | -1.34135746 |
| H                        | -2.69056087 | 1.26272343  | -0.51309991 |
| H                        | -1.98973499 | 1.62014569  | 1.83538534  |
| H                        | 0.20551641  | 2.65540661  | 2.32873780  |
| H                        | 1.69994194  | 3.33324527  | 0.47360502  |
| H                        | 0.99911606  | 2.97582302  | -1.87488024 |
| H                        | -1.19613534 | 1.94056209  | -2.36823270 |

28

|                           |            |             |             |
|---------------------------|------------|-------------|-------------|
| C6H5-SCH3...benzene Dimer |            |             |             |
| C                         | 0.43930155 | -1.56125676 | -0.20540925 |
| C                         | 0.79718937 | -1.24754680 | 1.10709838  |
| C                         | 1.17701662 | -1.01551199 | -1.26463576 |
| C                         | 2.60950035 | 0.14127200  | 0.29996798  |
| C                         | 2.25105724 | -0.17284664 | -1.01166374 |

25

|                         |             |             |             |
|-------------------------|-------------|-------------|-------------|
| C6H5-SH...benzene Dimer |             |             |             |
| C                       | -0.03431113 | -1.84160932 | -0.01161781 |
| C                       | 0.57723970  | -1.52323191 | 1.20406096  |
| C                       | 0.60012531  | -1.51013639 | -1.21027354 |
| C                       | 2.44611037  | -0.54793342 | 0.02067375  |
| C                       | 1.83481576  | -0.86618004 | -1.18908230 |
| C                       | 1.81051551  | -0.88000873 | 1.21556816  |
| H                       | 0.13638953  | -1.75154724 | -2.15933104 |
| H                       | 2.31689620  | -0.61429593 | -2.12564360 |
| H                       | 2.27502079  | -0.63819600 | 2.16349460  |
| H                       | 0.08880503  | -1.77842841 | 2.13700831  |
| S                       | -1.60720382 | -2.66199796 | 0.04873154  |
| H                       | -1.77910908 | -2.75101992 | -1.27820015 |
| H                       | 3.40567110  | -0.04746970 | 0.03285285  |
| C                       | -1.81037707 | 1.57425216  | -0.00956026 |
| C                       | -1.20462980 | 1.88960297  | 1.20546133  |
| C                       | 0.03109523  | 2.53410137  | 1.22154871  |
| C                       | 0.66107299  | 2.86324896  | 0.02261450  |
| C                       | 0.05532572  | 2.54789815  | -1.19240708 |
| C                       | -1.18039931 | 1.90339974  | -1.20849446 |
| H                       | -2.77052070 | 1.07348458  | -0.02205996 |
| H                       | -1.69411502 | 1.63385921  | 2.13701892  |
| H                       | 0.50175364  | 2.77912519  | 2.16560601  |
| H                       | 1.62121662  | 3.36401654  | 0.03511421  |
| H                       | 0.54481094  | 2.80364190  | -2.12396468 |
| H                       | -1.65105772 | 1.65837592  | -2.15255177 |

27

|                           |            |             |            |
|---------------------------|------------|-------------|------------|
| C6H5-SiF3...benzene Dimer |            |             |            |
| C                         | 0.81220072 | -1.09263900 | 0.00103032 |
| C                         | 1.30286634 | -0.58100492 | 1.21003047 |



|    |             |             |             |
|----|-------------|-------------|-------------|
| C  | 1.31142210  | -0.58794178 | -1.20741039 |
| C  | 2.75014208  | 0.92175340  | 0.00207751  |
| C  | 2.27506043  | 0.41624501  | -1.20647139 |
| C  | 2.26654416  | 0.42318874  | 1.21010050  |
| Si | -0.47015616 | -2.39910678 | 0.00019594  |
| F  | -1.96363035 | -1.83109257 | -0.01490981 |
| F  | -0.35485786 | -3.31369256 | 1.30473037  |
| F  | -0.33603864 | -3.33133260 | -1.28997701 |
| H  | 0.95385056  | -0.98372686 | -2.15103720 |
| H  | 0.93857848  | -0.97137194 | 2.15332628  |
| H  | 2.65665521  | 0.80000411  | -2.14409493 |
| H  | 2.64153827  | 0.81231458  | 2.14817568  |
| H  | 3.50094750  | 1.70215616  | 0.00247922  |
| C  | -2.02650614 | 1.65069758  | -0.00210136 |
| C  | -1.54435374 | 2.15325422  | 1.20521767  |
| C  | -0.57803943 | 3.15768925  | 1.20573983  |
| C  | -0.09387753 | 3.65956764  | -0.00105704 |
| C  | -0.57602993 | 3.15701100  | -1.20837606 |
| C  | -1.54234424 | 2.15257597  | -1.20889822 |
| H  | -2.77732085 | 0.87026352  | -0.00250707 |
| H  | -1.92054177 | 1.76330069  | 2.14288446  |
| H  | -0.20341276 | 3.54816978  | 2.14381233  |
| H  | 0.65693718  | 4.44000170  | -0.00065133 |
| H  | -0.19984190 | 3.54696453  | -2.14604285 |
| H  | -1.91697091 | 1.76209545  | -2.14697073 |

| 27                        |             |             |             |
|---------------------------|-------------|-------------|-------------|
| C6H5-SiH3...benzene Dimer |             |             |             |
| C                         | -0.05637032 | -1.90948611 | -0.00073901 |
| C                         | 0.59834270  | -1.61120061 | 1.20154816  |
| C                         | 0.59375892  | -1.60331153 | -1.20356664 |
| C                         | 2.48736876  | -0.71468351 | -0.00169242 |
| C                         | 1.85393374  | -1.00921585 | -1.20717308 |
| C                         | 1.85857343  | -1.01712485 | 1.20421768  |
| Si                        | -1.76702416 | -2.68049541 | -0.00002369 |
| H                         | -2.83312421 | -1.64017218 | -0.00226459 |
| H                         | -1.93758506 | -3.51685302 | 1.21942655  |
| H                         | -1.93730913 | -3.52121664 | -1.21652396 |
| H                         | 0.11617146  | -1.83347702 | -2.15013523 |
| H                         | 0.12434789  | -1.84757925 | 2.14837648  |
| H                         | 2.34148307  | -0.78067985 | -2.14711724 |
| H                         | 2.34972375  | -0.79477442 | 2.14376944  |
| H                         | 3.46820812  | -0.25511689 | -0.00207251 |
| C                         | -1.76077743 | 1.76236926  | 0.00169438  |
| C                         | -1.12931668 | 2.05815982  | 1.20851608  |
| C                         | 0.13224120  | 2.65071770  | 1.20804324  |
| C                         | 0.76233833  | 2.94748502  | 0.00074870  |
| C                         | 0.13087758  | 2.65169446  | -1.20607300 |
| C                         | -1.13068030 | 2.05913658  | -1.20560016 |
| H                         | -2.74099287 | 1.30195884  | 0.00206177  |
| H                         | -1.61889464 | 1.82757514  | 2.14656956  |
| H                         | 0.62287868  | 2.88054344  | 2.14572932  |
| H                         | 1.74255377  | 3.40789543  | 0.00038131  |
| H                         | 0.62045555  | 2.88227913  | -2.14412648 |
| H                         | -1.62131778 | 1.82931084  | -2.14328625 |

| 28                         |             |             |             |
|----------------------------|-------------|-------------|-------------|
| C6H5-CH2OH...benzene Dimer |             |             |             |
| C                          | 2.44196307  | 0.62445021  | 0.36824681  |
| C                          | 1.57685331  | 1.04845714  | 1.37247204  |
| C                          | 2.09158607  | 0.81574352  | -0.96828453 |
| C                          | 0.01373610  | 1.85352387  | -0.28345587 |
| C                          | 0.88421463  | 1.42683631  | -1.28952213 |
| C                          | 0.36557206  | 1.66152562  | 1.05047952  |
| H                          | 2.75773097  | 0.48943294  | -1.75757280 |
| H                          | 1.84244877  | 0.90314893  | 2.41255751  |
| C                          | -1.28715294 | 2.51241984  | -0.67150728 |
| H                          | -1.87040252 | 1.81995104  | -1.28856121 |
| H                          | -1.07321078 | 3.40435753  | -1.27077733 |
| H                          | 0.61502286  | 1.57396811  | -2.33086414 |
| H                          | -0.31029923 | 1.99287805  | 1.82657961  |
| H                          | 3.38134874  | 0.14895412  | 0.62176814  |
| O                          | -2.01002591 | 2.86300155  | 0.49834018  |
| H                          | -2.83850794 | 3.28271292  | 0.24336840  |
| C                          | 0.66307605  | -2.90207068 | 0.32663220  |
| C                          | -0.19801524 | -2.48016751 | 1.33815226  |
| C                          | -1.40739028 | -1.86802910 | 1.01357266  |
| C                          | -1.75567403 | -1.67779385 | -0.32252701 |
| C                          | -0.89458273 | -2.09969702 | -1.33404707 |
| C                          | 0.31479231  | -2.71183543 | -1.00946747 |
| H                          | 1.60274605  | -3.37769494 | 0.57882669  |
| H                          | 0.07259708  | -2.62797804 | 2.37628579  |
| H                          | -2.07644796 | -1.54021536 | 1.79951170  |
| H                          | -2.69534403 | -1.20216959 | -0.57472149 |
| H                          | -1.16519505 | -1.95188649 | -2.37218060 |
| H                          | 0.98384999  | -3.03964917 | -1.79540651 |

**C<sub>6</sub>H<sub>5</sub>-X...C<sub>6</sub>F<sub>6</sub> Dimers**

24

C6H5-H...perfluorobenzene Dimer

|   |             |             |             |
|---|-------------|-------------|-------------|
| C | 0.98556382  | -0.98556382 | -2.42045455 |
| C | -0.36074140 | -1.34630522 | -2.42045455 |
| C | 1.34630522  | 0.36074140  | -2.42045455 |
| C | -0.98556382 | 0.98556382  | -2.42045455 |
| C | 0.36074140  | 1.34630522  | -2.42045455 |
| C | -1.34630522 | -0.36074140 | -2.42045455 |
| H | 1.75154749  | -1.75154749 | -2.42045455 |
| H | -0.64111088 | -2.39265837 | -2.42045455 |
| H | -2.39265837 | -0.64111088 | -2.42045455 |
| H | -1.75154749 | 1.75154749  | -2.42045455 |
| H | 0.64111088  | 2.39265837  | -2.42045455 |
| H | 2.39265837  | 0.64111088  | -2.42045455 |
| C | 0.98143937  | -0.98143937 | 1.12954545  |
| C | -0.35923174 | -1.34067111 | 1.12954545  |
| C | -1.34067111 | -0.35923174 | 1.12954545  |
| C | -0.98143937 | 0.98143937  | 1.12954545  |
| C | 0.35923174  | 1.34067111  | 1.12954545  |
| C | 1.34067111  | 0.35923174  | 1.12954545  |
| F | 1.92276136  | -1.92276136 | 1.12954545  |
| F | -0.70377950 | -2.62654087 | 1.12954545  |
| F | -2.62654087 | -0.70377950 | 1.12954545  |
| F | -1.92276136 | 1.92276136  | 1.12954545  |
| F | 0.70377950  | 2.62654087  | 1.12954545  |
| F | 2.62654087  | 0.70377950  | 1.12954545  |

26

C6H5-BF<sub>2</sub>...perfluorobenzene Dimer

|   |             |             |             |
|---|-------------|-------------|-------------|
| C | -2.80825992 | 0.14147238  | 0.00000000  |
| C | -2.36658720 | -0.39302085 | -1.20980600 |
| C | -2.36658720 | -0.39302085 | 1.20980600  |
| C | -1.02771245 | -2.01326917 | 0.00000000  |
| C | -1.48042241 | -1.46541915 | 1.20800000  |
| C | -1.48042241 | -1.46541915 | -1.20800000 |
| H | -1.13480948 | -1.88366497 | -2.14609300 |
| H | -2.71245684 | 0.02553563  | -2.14674300 |
| H | -2.71245684 | 0.02553563  | 2.14674300  |
| H | -1.13480948 | -1.88366497 | 2.14609300  |
| F | 0.40258094  | -3.74414836 | -1.13455100 |
| F | 0.40258094  | -3.74414836 | 1.13455100  |
| B | -0.04309212 | -3.20481410 | 0.00000000  |
| H | -3.49841881 | 0.97667282  | 0.00000000  |
| C | -0.06921953 | 2.39982858  | 0.00000000  |
| C | 0.37284558  | 1.86486050  | -1.20201300 |
| C | 1.25697452  | 0.79492589  | -1.20201300 |
| C | 1.69903963  | 0.25995781  | 0.00000000  |
| C | 1.25697452  | 0.79492589  | 1.20201300  |

|   |             |             |             |
|---|-------------|-------------|-------------|
| C | 0.37284558  | 1.86486050  | 1.20201300  |
| F | -0.91720908 | 3.42602886  | 0.00000000  |
| F | -0.05114983 | 2.37796142  | -2.35489200 |
| F | 1.68096994  | 0.28182497  | -2.35489200 |
| F | 2.54702919  | -0.76624247 | 0.00000000  |
| F | 1.68096994  | 0.28182497  | 2.35489200  |
| F | -0.05114983 | 2.37796142  | 2.35489200  |

26

C6H5-CCH...perfluorobenzene Dimer

|   |             |             |             |
|---|-------------|-------------|-------------|
| C | -0.90300959 | 2.30322449  | 0.00000000  |
| C | -1.37795766 | 1.78198783  | 1.21067500  |
| C | -1.37795766 | 1.78198783  | -1.21067500 |
| C | -2.78457158 | 0.23828485  | 0.00000000  |
| C | -2.31444595 | 0.75422908  | -1.20665700 |
| C | -2.31444595 | 0.75422908  | 1.20665700  |
| H | -1.00758493 | 2.18845721  | -2.14301400 |
| H | -1.00758493 | 2.18845721  | 2.14301400  |
| H | -2.67764699 | 0.35563035  | -2.14584400 |
| H | -2.67764699 | 0.35563035  | 2.14584400  |
| C | 0.06379602  | 3.36425530  | 0.00000000  |
| C | 0.87724701  | 4.25698550  | 0.00000000  |
| H | 1.59501116  | 5.04470318  | 0.00000000  |
| H | -3.51406515 | -0.56230540 | 0.00000000  |
| C | 1.71346727  | -0.09608266 | 0.00000000  |
| C | 1.24605324  | -0.60905102 | -1.20201300 |
| C | 0.31122654  | -1.63498625 | -1.20201300 |
| C | -0.15618749 | -2.14795460 | 0.00000000  |
| C | 0.31122654  | -1.63498625 | 1.20201300  |
| C | 1.24605324  | -0.60905102 | 1.20201300  |
| F | 2.61008228  | 0.88791674  | 0.00000000  |
| F | 1.69436142  | -0.11705057 | -2.35489200 |
| F | -0.13708164 | -2.12698669 | -2.35489200 |
| F | -1.05280250 | -3.13195401 | 0.00000000  |
| F | -0.13708164 | -2.12698669 | 2.35489200  |
| F | 1.69436142  | -0.11705057 | 2.35489200  |

27

C6H5-CF<sub>3</sub>...perfluorobenzene Dimer

|   |             |             |             |
|---|-------------|-------------|-------------|
| C | 2.84515553  | -0.19927723 | -0.06161244 |
| C | 2.32617261  | 0.29022487  | -1.25850236 |
| C | 2.41025640  | 0.32201029  | 1.15519793  |
| C | 0.94066949  | 1.81728619  | -0.02182335 |
| C | 1.45535565  | 1.33420983  | 1.17899328  |
| C | 1.37100331  | 1.30232290  | -1.24241690 |
| H | 2.81075079  | -0.06030429 | 2.08540069  |
| H | 2.66132730  | -0.11678941 | -2.20393873 |
| C | -0.04863069 | 2.94356473  | -0.00219083 |
| F | -0.80846367 | 2.93200475  | 1.11076533  |

|   |             |             |             |
|---|-------------|-------------|-------------|
| F | 0.56290434  | 4.14859647  | -0.03936302 |
| F | -0.88404534 | 2.90343369  | -1.05889607 |
| H | 1.10819914  | 1.74134215  | 2.11962663  |
| H | 0.95887051  | 1.68489305  | -2.16699824 |
| H | 3.58638422  | -0.98853957 | -0.07703977 |
| C | 0.15671081  | -2.58268112 | -0.00012572 |
| C | -0.32940227 | -2.06499612 | -1.19266250 |
| C | -1.25010113 | -1.02652648 | -1.17426434 |
| C | -1.68468823 | -0.50574034 | 0.03667063  |
| C | -1.19857514 | -1.02342533 | 1.22920742  |
| C | -0.27787629 | -2.06189497 | 1.21080925  |
| F | 1.03977545  | -3.57870258 | -0.01777185 |
| F | 0.08742082  | -2.56449480 | -2.35409878 |
| F | -1.71634401 | -0.53000220 | -2.31805446 |
| F | -2.56775287 | 0.49028113  | 0.05431676  |
| F | -1.61539823 | -0.52392666 | 2.39064370  |
| F | 0.18836659  | -2.55841926 | 2.35459938  |

27

|                                   |             |             |             |
|-----------------------------------|-------------|-------------|-------------|
| C6H5-CH3...perfluorobenzene Dimer |             |             |             |
| C                                 | 2.58381160  | 0.94656939  | 0.03385434  |
| C                                 | 2.03851210  | 1.37495010  | -1.17442442 |
| C                                 | 1.99314246  | 1.34430440  | 1.23123413  |
| C                                 | 0.30776164  | 2.59591947  | 0.01194079  |
| C                                 | 0.86613748  | 2.16302034  | 1.21723488  |
| C                                 | 0.91138741  | 2.19358512  | -1.18207987 |
| H                                 | 2.41167567  | 1.02127259  | 2.17692896  |
| H                                 | 2.49255572  | 1.07590482  | -2.11158811 |
| C                                 | -0.93241938 | 3.45486867  | -0.00050714 |
| H                                 | -0.98559779 | 4.08165041  | 0.89107738  |
| H                                 | -1.83241107 | 2.83435604  | -0.02538510 |
| H                                 | -0.95224862 | 4.10417672  | -0.87721084 |
| H                                 | 0.41355147  | 2.47178281  | 2.15355785  |
| H                                 | 0.49427408  | 2.52630838  | -2.12663281 |
| H                                 | 3.46244951  | 0.31324371  | 0.04235752  |
| C                                 | 0.55970097  | -1.93643238 | 0.00085044  |
| C                                 | 0.00488452  | -1.53603225 | -1.20675302 |
| C                                 | -1.13386283 | -0.74257823 | -1.21812146 |
| C                                 | -1.71779538 | -0.34952319 | -0.02188647 |
| C                                 | -1.16297894 | -0.74992331 | 1.18571699  |
| C                                 | -0.02423159 | -1.54337734 | 1.19708544  |
| F                                 | 1.65190122  | -2.69745341 | 0.01175420  |
| F                                 | 0.56494845  | -1.91302092 | -2.35409019 |
| F                                 | -1.66600080 | -0.35854472 | -2.37636241 |
| F                                 | -2.80999564 | 0.41149785  | -0.03279022 |
| F                                 | -1.72304287 | -0.37293465 | 2.33305417  |
| F                                 | 0.50790639  | -1.92741085 | 2.35532638  |

26

|                                   |             |             |              |
|-----------------------------------|-------------|-------------|--------------|
| C6H5-CHO...perfluorobenzene Dimer |             |             |              |
| C                                 | 0.85472742  | 2.27470977  | -0.17654354  |
| C                                 | 1.11841953  | 1.92780581  | 1.15183808   |
| C                                 | 1.52882767  | 1.63809038  | -1.21924559  |
| C                                 | 2.73195836  | 0.30649086  | 0.38548376   |
| C                                 | 2.47013787  | 0.65123244  | -0.93878856  |
| C                                 | 2.05736774  | 0.94349516  | 1.43033156   |
| H                                 | 1.31505527  | 1.91649437  | -2.24599330  |
| H                                 | 0.58026503  | 2.43849463  | 1.94068211   |
| H                                 | 2.99556058  | 0.15464539  | -1.74480055  |
| H                                 | 2.26778980  | 0.66858811  | 2.45635609   |
| C                                 | -0.14345900 | 3.32212416  | -0.49041124  |
| O                                 | -0.77961224 | 3.93151484  | 0.34088270   |
| H                                 | -0.28526271 | 3.52905253  | -1.56624031  |
| H                                 | 3.46374190  | -0.46088883 | 0.60682918   |
| C                                 | 0.18470685  | -2.16229206 | 0.24720311   |
| C                                 | -0.08179216 | -1.81315466 | -1.06943238  |
| C                                 | -1.01992199 | -0.82955438 | -1.35030064  |
| C                                 | -1.69155417 | -0.19509008 | -0.31453381  |
| C                                 | -1.42505516 | -0.54422748 | -1.00210168  |
| C                                 | -0.48692533 | -1.52782776 | 1.28296994   |
| F                                 | 1.08448996  | -3.10568699 | 0.51659067   |
| F                                 | 0.56238647  | -2.42168471 | -2.06286065  |
| F                                 | -1.27552783 | -0.49468808 | -0.261311688 |
| F                                 | -2.59133728 | 0.74830485  | -0.58392137  |
| F                                 | -2.06923379 | 0.06430256  | 1.99552995   |
| F                                 | -0.23131949 | -1.86269406 | 2.54578618   |

25

|                                  |             |             |             |
|----------------------------------|-------------|-------------|-------------|
| C6H5-CN...perfluorobenzene Dimer |             |             |             |
| C                                | -2.77102869 | -0.27892347 | 0.00000000  |
| C                                | -2.29826802 | -0.78705865 | 1.20898600  |
| C                                | -2.29826802 | -0.78705865 | -1.20898600 |
| C                                | -0.87973399 | -2.31173509 | 0.00000000  |
| C                                | -1.35132987 | -1.80485185 | -1.21523800 |
| C                                | -1.35132987 | -1.80485185 | 1.21523800  |
| C                                | 0.10099259  | -3.36584495 | 0.00000000  |
| N                                | 0.88854672  | -4.21232815 | 0.00000000  |
| H                                | -2.66676440 | -0.39098939 | 2.14648100  |
| H                                | -2.66676440 | -0.39098939 | -2.14648100 |
| H                                | -0.97527667 | -2.20904339 | -2.14582200 |
| H                                | -0.97527667 | -2.20904339 | 2.14582200  |
| H                                | -3.50860928 | 0.51384690  | 0.00000000  |
| C                                | -0.17135675 | 2.13855591  | 0.00000000  |
| C                                | 0.30135896  | 1.63046905  | -1.20201300 |
| C                                | 1.24678903  | 0.61429679  | -1.20201300 |
| C                                | 1.71950474  | 0.10620993  | 0.00000000  |
| C                                | 1.24678903  | 0.61429679  | 1.20201300  |
| C                                | 0.30135896  | 1.63046905  | 1.20201300  |
| F                                | -1.07814169 | 3.11319142  | 0.00000000  |

|   |             |             |             |
|---|-------------|-------------|-------------|
| F | -0.15203419 | 2.11778754  | -2.35489200 |
| F | 1.70018218  | 0.12697830  | -2.35489200 |
| F | 2.62628968  | -0.86842558 | 0.00000000  |
| F | 1.70018218  | 0.12697830  | 2.35489200  |
| F | -0.15203419 | 2.11778754  | 2.35489200  |

29

C6H5-COCH3...perfluorobenzene Dimer

|   |             |             |             |
|---|-------------|-------------|-------------|
| C | 0.98393696  | -2.00214107 | -0.14682163 |
| C | 1.65487819  | -1.44685150 | 0.94745251  |
| C | 1.19475892  | -1.47671274 | -1.42441795 |
| C | 2.73268351  | 0.14156765  | -0.51218390 |
| C | 2.06771138  | -0.40672809 | -1.60621084 |
| C | 2.52547603  | -0.37965688 | 0.76570623  |
| H | 0.68312989  | -1.89519951 | -2.28173859 |
| H | 1.47755766  | -1.86848737 | 1.92825013  |
| H | 2.22751455  | -0.00334115 | -2.59824788 |
| H | 3.04284766  | 0.04717404  | 1.61579975  |
| C | 0.05533862  | -3.15184311 | 0.09974627  |
| O | -0.10610159 | -3.58587935 | 1.22445910  |
| C | -0.67621785 | -3.76127982 | -1.07499881 |
| H | 0.03190740  | -4.14518332 | -1.81291046 |
| H | -1.30282302 | -3.01466301 | -1.56821900 |
| H | -1.29770317 | -4.57454318 | -0.70761620 |
| H | 3.41140507  | 0.97358679  | -0.65401241 |
| C | -1.65486801 | 0.24563991  | 0.33720708  |
| C | -1.44863356 | 0.76418868  | -0.93362815 |
| C | -0.57883749 | 1.83043206  | -1.11535298 |
| C | 0.08472539  | 2.37812820  | -0.02624284 |
| C | -0.12150906 | 1.85957943  | 1.24459239  |
| C | -0.99130513 | 0.79333605  | 1.42631722  |
| F | -2.48911056 | -0.77702002 | 0.51150377  |
| F | -2.08507271 | 0.23887998  | -1.97821929 |
| F | -0.38103282 | 2.32778483  | -2.33424107 |
| F | 0.91896795  | 3.40078813  | -0.20053954 |
| F | 0.51493009  | 2.38488812  | 2.28918352  |
| F | -1.18910979 | 0.29598328  | 2.64520531  |

30

C6H5-COOCH3...perfluorobenzene Dimer

|   |            |             |             |
|---|------------|-------------|-------------|
| C | 1.19779733 | -1.69408576 | 0.21840117  |
| C | 1.98211156 | -1.03087026 | -0.72712925 |
| C | 1.14501825 | -1.23687114 | 1.53674268  |
| C | 2.66317352 | 0.54899015  | 0.96190810  |
| C | 1.87977298 | -0.11387792 | 1.90527395  |
| C | 2.71435056 | 0.09054536  | -0.35419078 |
| H | 0.53411799 | -1.75844605 | 2.26071746  |
| H | 2.00444372 | -1.40703381 | -1.74175130 |
| H | 1.84120650 | 0.24348110  | 2.92677426  |

|   |             |             |             |
|---|-------------|-------------|-------------|
| H | 3.32330893  | 0.60638399  | -1.08606088 |
| C | 0.43355084  | -2.88931925 | -0.23284109 |
| O | 0.44808741  | -3.32238244 | -1.36384466 |
| O | -0.28614245 | -3.45070677 | 0.75275651  |
| C | -1.04137714 | -4.60770359 | 0.36719706  |
| H | -1.55527633 | -4.92994606 | 1.26752709  |
| H | -1.75191308 | -4.34482797 | -0.41422049 |
| H | -0.37201549 | -5.38407956 | 0.00144627  |
| H | 3.23381837  | 1.42277566  | 1.25216832  |
| C | -1.55813045 | 0.38405841  | -0.61146839 |
| C | -0.77755310 | 1.04531506  | -1.54949093 |
| C | -0.04608581 | 2.16498429  | -1.17835689 |
| C | -0.09519483 | 2.62339850  | 0.13080024  |
| C | -0.87577218 | 1.96214185  | 1.06882278  |
| C | -1.60723947 | 0.84247261  | 0.69768874  |
| F | -2.25969850 | -0.68984356 | -0.96743207 |
| F | -0.73045177 | 0.60563875  | -2.80513454 |
| F | 0.70258461  | 2.79921157  | -2.07803628 |
| F | 0.60637322  | 3.69730047  | 0.48676392  |
| F | -0.92287351 | 2.40181816  | 2.32446639  |
| F | -2.35590989 | 0.20824533  | 1.59736813  |

27

C6H5-COOH...perfluorobenzene Dimer

|   |             |             |             |
|---|-------------|-------------|-------------|
| C | 2.79647268  | -0.03694050 | -0.05882999 |
| C | 2.30834872  | 0.49748491  | -1.25011426 |
| C | 2.36763566  | 0.47033423  | 1.16768357  |
| C | 0.96168045  | 2.04741052  | 0.00937771  |
| C | 1.44960383  | 1.51326023  | 1.20351499  |
| C | 1.38908907  | 1.54170980  | -1.22001236 |
| H | 2.64310453  | 0.10161753  | -2.20044711 |
| H | 2.74840184  | 0.05335542  | 2.09125608  |
| H | 1.00329454  | 1.96450031  | -2.13741367 |
| H | 1.10002217  | 1.92574522  | 2.14086758  |
| C | -0.01693582 | 3.15999318  | 0.09753775  |
| O | -0.42646267 | 3.64210089  | 1.12886801  |
| O | -0.42700902 | 3.60553842  | -1.10949206 |
| H | -1.05725539 | 4.32392760  | -0.94038114 |
| H | 3.51181176  | -0.84958291 | -0.08582367 |
| C | 0.13173306  | -2.38217909 | -0.01983775 |
| C | -0.35608228 | -1.84799199 | -1.20437479 |
| C | -1.27289217 | -0.80648245 | -1.17029273 |
| C | -1.70188803 | -0.29915851 | 0.04832642  |
| C | -1.21407268 | -0.83334561 | 1.23286345  |
| C | -0.29726280 | -1.87485514 | 1.19878139  |
| F | 1.01106769  | -3.38111620 | -0.05252668 |
| F | 0.05537812  | -2.37318115 | -2.37318115 |
| F | -1.74076772 | -0.29413061 | -2.30641011 |
| F | -2.58122266 | 0.69977860  | 0.08101535  |
| F | -1.62553309 | -0.34675884 | 2.40166981  |

|                                 |             |             |             |
|---------------------------------|-------------|-------------|-------------|
| F                               | 0.17061275  | -2.38720699 | 2.33489877  |
| 24                              |             |             |             |
| C6H5-F...perfluorobenzene Dimer |             |             |             |
| C                               | -0.26986707 | 2.56733855  | 0.00000000  |
| C                               | -0.81914001 | 2.19870673  | 1.21658000  |
| C                               | -0.81914001 | 2.19870673  | -1.21658000 |
| C                               | -2.55597513 | 1.03307004  | 0.00000000  |
| C                               | -1.97600379 | 1.42230438  | -1.20644900 |
| C                               | -1.97600379 | 1.42230438  | 1.20644900  |
| F                               | 0.85417682  | 3.32171457  | 0.00000000  |
| H                               | -0.34590269 | 2.51630900  | 2.13600000  |
| H                               | -0.34590269 | 2.51630900  | -2.13600000 |
| H                               | -2.42377053 | 1.12179610  | -2.14537100 |
| H                               | -2.42377053 | 1.12179610  | 2.14537100  |
| H                               | -3.45455344 | 0.43001001  | 0.00000000  |
| C                               | 1.72806863  | -0.36716540 | 0.00000000  |
| C                               | 1.15182883  | -0.75389540 | -1.20201300 |
| C                               | -0.00064911 | -1.52735429 | -1.20201300 |
| C                               | -0.57688891 | -1.91408429 | 0.00000000  |
| C                               | -0.00064911 | -1.52735429 | 1.20201300  |
| C                               | 1.15182883  | -0.75389540 | 1.20201300  |
| F                               | 2.83343823  | 0.37467782  | 0.00000000  |
| F                               | 1.70451446  | -0.38297324 | -2.35489200 |
| F                               | -0.55333474 | -1.89827646 | -2.35489200 |
| F                               | -1.68225851 | -2.65592751 | 0.00000000  |
| F                               | -0.55333474 | -1.89827646 | 2.35489200  |
| F                               | 1.70451446  | -0.38297324 | 2.35489200  |

|                                      |             |             |             |
|--------------------------------------|-------------|-------------|-------------|
| 32                                   |             |             |             |
| C6H5-NCH3_2...perfluorobenzene Dimer |             |             |             |
| C                                    | 0.84825225  | -2.00260390 | 0.00149463  |
| C                                    | 1.34877580  | -1.47168847 | 1.20718069  |
| C                                    | 1.35301297  | -1.47169771 | -1.20243158 |
| C                                    | 2.76500209  | 0.08651772  | 0.00485358  |
| C                                    | 2.28901705  | -0.44337930 | -1.19136234 |
| C                                    | 2.28480395  | -0.44335639 | 1.19938995  |
| H                                    | 1.00961909  | -1.85498943 | 2.15844788  |
| H                                    | 2.64382550  | -0.05799493 | 2.14645360  |
| H                                    | 2.65137932  | -0.05803545 | -2.13716074 |
| H                                    | 1.01716888  | -1.85498934 | -2.15487851 |
| N                                    | -0.11407777 | -3.00470716 | -0.00021600 |
| C                                    | -0.33778814 | -3.73081762 | -1.23545265 |
| H                                    | -1.09320728 | -4.49429828 | -1.06096447 |
| H                                    | -0.71879808 | -3.06377247 | -2.00998468 |
| H                                    | 0.57407005  | -4.21590240 | -1.60954324 |
| C                                    | -0.34270533 | -3.73032745 | 1.23439852  |
| H                                    | -0.72644421 | -3.06287829 | 2.00723309  |
| H                                    | -1.09770056 | -4.49362633 | 1.05730190  |

|   |             |             |             |
|---|-------------|-------------|-------------|
| H | 0.56756340  | -4.21557803 | 1.61214030  |
| H | 3.49562940  | 0.88491912  | 0.00613294  |
| C | -1.70250366 | 0.38576778  | -0.00300093 |
| C | -1.23122097 | 0.89712418  | -1.20418989 |
| C | -0.29288227 | 1.91984694  | -1.20254553 |
| C | 0.17417510  | 2.43121477  | 0.00028780  |
| C | -0.29710758 | 1.91985837  | 1.20147676  |
| C | -1.23544629 | 0.89713561  | 1.19983239  |
| F | -2.60248711 | -0.59515047 | -0.00457808 |
| F | -1.67918708 | 0.40665884  | -2.35785569 |
| F | 0.15913643  | 2.41030132  | -2.35463417 |
| F | 1.07415856  | 3.41213302  | 0.00186495  |
| F | 0.15085852  | 2.41032371  | 2.35514255  |
| F | -1.68746499 | 0.40668123  | 2.35192104  |

|                                   |             |             |             |
|-----------------------------------|-------------|-------------|-------------|
| 26                                |             |             |             |
| C6H5-NH2...perfluorobenzene Dimer |             |             |             |
| C                                 | 0.24795283  | -2.58438577 | 0.00000000  |
| C                                 | 0.83820383  | -2.18419682 | -1.20529550 |
| C                                 | 0.83820383  | -2.18419682 | 1.20529550  |
| C                                 | 2.58027990  | -1.01228412 | 0.00000000  |
| C                                 | 1.99182475  | -1.40775986 | 1.19985750  |
| C                                 | 1.99182475  | -1.40775986 | -1.19985750 |
| H                                 | 0.38486271  | -2.47932290 | 2.14520650  |
| H                                 | 2.43399461  | -1.11173229 | 2.14355150  |
| H                                 | 2.43399461  | -1.11173229 | -2.14355150 |
| H                                 | 0.38486271  | -2.47932290 | -2.14520650 |
| H                                 | -1.10551606 | -3.86006116 | 0.83449000  |
| H                                 | -1.10551606 | -3.86006116 | -0.83449000 |
| N                                 | -0.94020561 | -3.31858224 | 0.00000000  |
| H                                 | 3.47902605  | -0.40941729 | 0.00000000  |
| C                                 | -1.72040949 | 0.37117067  | 0.00000000  |
| C                                 | -1.14494882 | 0.75905909  | -1.20201300 |
| C                                 | 0.00597085  | 1.53483481  | -1.20201300 |
| C                                 | 0.58143152  | 1.92272323  | 0.00000000  |
| C                                 | 0.00597085  | 1.53483481  | 1.20201300  |
| C                                 | -1.14494882 | 0.75905909  | 1.20201300  |
| F                                 | -2.82428452 | -0.37289468 | 0.00000000  |
| F                                 | -1.69688717 | 0.38702586  | -2.35489200 |
| F                                 | 0.55790919  | 1.90686804  | -2.35489200 |
| F                                 | 1.68530655  | 2.66678857  | 0.00000000  |
| F                                 | 0.55790919  | 1.90686804  | 2.35489200  |
| F                                 | -1.69688717 | 0.38702586  | 2.35489200  |

|                                     |            |             |             |
|-------------------------------------|------------|-------------|-------------|
| 29                                  |            |             |             |
| C6H5-NHCH3...perfluorobenzene Dimer |            |             |             |
| C                                   | 0.83824257 | -2.19482448 | -0.21596001 |
| C                                   | 1.06990235 | -1.86038906 | 1.12563843  |
| C                                   | 1.56117427 | -1.51394223 | -1.21128003 |

|   |             |             |             |
|---|-------------|-------------|-------------|
| C | 2.70567718  | -0.19593639 | 0.46399542  |
| C | 2.48023289  | -0.53247577 | -0.87259457 |
| C | 1.99284333  | -0.86721818 | -1.45118592 |
| H | 1.38523219  | -1.75803362 | -2.25363772 |
| H | 3.02463640  | -0.02368560 | -1.65923113 |
| H | 2.15362009  | -0.62364039 | 2.49473914  |
| H | 0.53323920  | -2.36697988 | 1.91645888  |
| N | -0.10047760 | -3.14878733 | -0.58452633 |
| H | 0.05305926  | -3.54386800 | -1.49781856 |
| C | -0.63935356 | -4.06779743 | 0.39618772  |
| H | -1.26559219 | -4.79486827 | -0.11804571 |
| H | -1.26910209 | -3.53255694 | 1.10914449  |
| H | 0.14128787  | -4.60149915 | 0.95273745  |
| H | 3.42256294  | 0.57147069  | 0.72569197  |
| C | -1.66985173 | 0.23918149  | -0.38372051 |
| C | -0.96780732 | 0.90127495  | -1.38132443 |
| C | -0.04826643 | 1.88554468  | -1.04650851 |
| C | 0.16923140  | 2.20772237  | 0.28591181  |
| C | -0.53281300 | 1.54562891  | 1.28351572  |
| C | -1.45235390 | 0.56135918  | 0.94869980  |
| F | -2.55180575 | -0.70485552 | -0.70485060 |
| F | -1.17641498 | 0.59226635  | -2.65928029 |
| F | 0.62508127  | 2.52057452  | -2.00333380 |
| F | 1.05118542  | 3.15175938  | 0.60704189  |
| F | -0.32420535 | 1.85463751  | 2.56147158  |
| F | -2.12570160 | -0.07367065 | 1.90552509  |

27

C6H5-NHOH...perfluorobenzene Dimer

|   |             |             |             |
|---|-------------|-------------|-------------|
| C | 2.69407136  | 0.23954362  | -0.46306934 |
| C | 2.46637438  | 0.56085263  | 0.87547778  |
| C | 1.97816580  | 0.90828992  | -1.45119665 |
| C | 0.82062001  | 2.20119588  | 0.21829945  |
| C | 1.04263781  | 1.88815928  | -1.12173926 |
| C | 1.53547530  | 1.53291386  | 1.21853081  |
| H | 1.35069571  | 1.76979579  | 2.26083155  |
| H | 3.01510670  | 0.05104682  | 1.65813874  |
| H | 2.14840846  | 0.67325644  | -2.49503698 |
| H | 0.50001859  | 2.41789272  | -1.89108928 |
| N | -0.16429330 | 3.13442950  | 0.62265481  |
| H | 0.18291763  | 3.72272387  | 1.37099110  |
| O | -0.53095614 | 4.01040235  | -0.41668801 |
| H | -1.47869943 | 3.85989300  | -0.52215992 |
| H | 3.41967937  | -0.51869554 | -0.72848201 |
| C | 0.18568149  | -2.19556780 | -0.29743049 |
| C | -0.52252047 | -1.53673591 | -1.29283903 |
| C | -1.45225121 | -0.56323403 | -0.95469867 |
| C | -1.67378133 | -0.24856263 | 0.37885072  |
| C | -0.96557936 | -0.90739453 | 1.37425926  |
| C | -0.03584862 | -1.88089641 | 1.03611890  |

|   |             |             |             |
|---|-------------|-------------|-------------|
| F | 1.07740884  | -3.12927711 | -0.62174912 |
| F | -0.31004535 | -1.83854504 | -2.57187782 |
| F | -2.13150478 | 0.06866755  | -1.90941834 |
| F | -2.56550868 | 0.68514668  | 0.70316936  |
| F | -1.17805449 | -0.60558539 | 2.65329805  |
| F | 0.64340494  | -2.51279799 | 1.99083857  |

25

C6H5-NO...perfluorobenzene Dimer

|   |             |             |             |
|---|-------------|-------------|-------------|
| C | 0.78949950  | -2.29965911 | -0.16856337 |
| C | 1.47461686  | -1.69464143 | -1.21896855 |
| C | 1.04826268  | -1.96734295 | 1.16337963  |
| C | 2.70846916  | -0.39502170 | 0.38679473  |
| C | 2.01409184  | -1.00920912 | 1.43487087  |
| C | 2.44226313  | -0.73416793 | -0.93802319 |
| H | 0.49406702  | -2.46047512 | 1.95094963  |
| H | 1.23586312  | -1.98840221 | -2.23378792 |
| H | 2.23206391  | -0.73513226 | 2.45937185  |
| H | 2.98430052  | -0.25390335 | -1.74243629 |
| N | -0.18974266 | -3.27835336 | -0.56463011 |
| O | -0.78061527 | -3.79974748 | 0.34789816  |
| H | 3.46058740  | 0.35176152  | 0.60916278  |
| C | -1.69493148 | 0.32149600  | -0.32183144 |
| C | -1.00382988 | 0.84317428  | -1.35849721 |
| C | -0.03886554 | 1.80093157  | -1.07923237 |
| C | 0.23499859  | 2.14701196  | 0.23669866  |
| C | -0.45610301 | 1.53533369  | 1.27336443  |
| C | -1.42106735 | 0.57757639  | 0.99409958  |
| F | -2.62045223 | -0.68711230 | -0.58968114 |
| F | -1.26649981 | 0.51124003  | -2.62063778 |
| F | 0.62398667  | 2.38760700  | -2.07352283 |
| F | 1.16051934  | 3.06562026  | 0.50454836  |
| F | -0.19343308 | 1.86726793  | 2.53550500  |
| F | -2.08391956 | -0.00909904 | 1.98839005  |

26

C6H5-NO2...perfluorobenzene Dimer

|   |             |            |             |
|---|-------------|------------|-------------|
| C | -0.91800139 | 2.06602865 | 0.00000000  |
| C | -1.36814865 | 1.57703468 | -1.21951500 |
| C | -1.36814865 | 1.57703468 | 1.21951500  |
| C | -2.77939382 | 0.04400220 | 0.00000000  |
| C | -2.31010463 | 0.55379001 | -1.21000200 |
| C | -2.31010463 | 0.55379001 | 1.21000200  |
| H | -2.67668991 | 0.15556923 | -2.14716400 |
| H | -0.98507705 | 1.99316451 | -2.13988900 |
| H | -0.98507705 | 1.99316451 | 2.13988900  |
| H | -2.67668991 | 0.15556923 | 2.14716400  |
| O | 0.45981398  | 3.56274641 | -1.07799600 |
| O | 0.45981398  | 3.56274641 | 1.07799600  |

|   |             |             |             |
|---|-------------|-------------|-------------|
| N | 0.07806104  | 3.14804904  | 0.00000000  |
| H | -3.51258267 | -0.75245921 | 0.00000000  |
| C | 1.70955124  | -0.32123049 | 0.00000000  |
| C | 1.23953126  | -0.83181214 | -1.20201300 |
| C | 0.29949266  | -1.85297398 | -1.20201300 |
| C | -0.17052732 | -2.36355563 | 0.00000000  |
| C | 0.29949266  | -1.85297398 | 1.20201300  |
| C | 1.23953126  | -0.83181214 | 1.20201300  |
| F | 2.61116510  | 0.65819064  | 0.00000000  |
| F | 1.69033887  | -0.34210084 | -2.35489200 |
| F | -0.15131495 | -2.34268528 | -2.35489200 |
| F | -1.07214119 | -3.34297676 | 0.00000000  |
| F | -0.15131495 | -2.34268528 | 2.35489200  |
| F | 1.69033887  | -0.34210084 | 2.35489200  |

28

C6H5-OCF3...perfluorobenzene Dimer

|   |             |             |             |
|---|-------------|-------------|-------------|
| C | 1.23426631  | -1.45596286 | -0.37799875 |
| C | 1.80133388  | -0.66451670 | -1.36943358 |
| C | 1.43729478  | -1.19422047 | 0.97085041  |
| C | 2.81257471  | 0.70267160  | 0.34433298  |
| C | 2.23452416  | -0.10364776 | 1.31907109  |
| C | 2.59242045  | 0.41738150  | -1.00250576 |
| H | 0.99638738  | -1.80957213 | 1.74053159  |
| H | 1.61384158  | -0.90887514 | -2.40661729 |
| H | 2.39893429  | 0.10886113  | 2.36778178  |
| H | 3.03619758  | 1.03666753  | -1.77162042 |
| C | -0.15450072 | -3.36772518 | -0.03944999 |
| O | 0.46102237  | -2.51175398 | -0.87103714 |
| F | -1.04189030 | -2.75977670 | 0.76881905  |
| F | 0.70626284  | -4.03255279 | 0.75266793  |
| F | -0.80991321 | -4.25855530 | -0.77835430 |
| H | 3.42873801  | 1.54534722  | 0.62978774  |
| C | -1.64197355 | 0.62474126  | -0.35471027 |
| C | -1.06904698 | 1.42408223  | -1.33412684 |
| C | -0.27818392 | 2.50573669  | -0.97218304 |
| C | -0.06024630 | 2.78805175  | 0.36917785  |
| C | -0.63317287 | 1.98871078  | 1.34859443  |
| C | -1.42403593 | 0.90705632  | 0.98665063  |
| F | -2.40050953 | -0.41269981 | -0.70185937 |
| F | -1.27807640 | 1.15330677  | -2.62065784 |
| F | 0.27132378  | 3.27240387  | -1.91156442 |
| F | 0.69828968  | 3.82549282  | 0.71632695  |
| F | -0.42414345 | 2.25948624  | 2.63512542  |
| F | -1.97354362 | 0.14038914  | 1.92603200  |

25

C6H5-OH...perfluorobenzene Dimer

|   |            |             |             |
|---|------------|-------------|-------------|
| C | 0.32759702 | -2.54236752 | -0.00059936 |
|---|------------|-------------|-------------|

|   |             |             |             |
|---|-------------|-------------|-------------|
| C | 0.88831564  | -2.13721399 | 1.20968451  |
| C | 0.88816763  | -2.13373126 | -1.20919258 |
| C | 2.58485772  | -0.90412744 | -0.00035044 |
| C | 2.01607793  | -1.31514386 | -1.20229521 |
| C | 2.01318775  | -1.32081068 | 1.20248156  |
| H | 0.44780803  | -2.45193440 | -2.14865639 |
| H | 2.44752557  | -1.00061547 | -2.14477688 |
| H | 2.44655732  | -1.00768454 | 2.14456360  |
| H | 0.43251191  | -2.46939138 | 2.13344152  |
| O | -0.77740132 | -3.34442536 | 0.05929475  |
| H | -1.07585286 | -3.55970711 | -0.83267046 |
| H | 3.46080500  | -0.26839780 | 0.00106215  |
| C | -1.72607336 | 0.29178555  | 0.00403510  |
| C | -1.16518292 | 0.70064408  | -1.19791509 |
| C | -0.04188110 | 1.51589685  | -1.19779122 |
| C | 0.52053188  | 1.92229227  | 0.00428284  |
| C | -0.04035856 | 1.51343375  | 1.20623304  |
| C | -1.16366038 | 0.69818097  | 1.20610917  |
| F | -2.80345943 | -0.49014320 | 0.00391630  |
| F | -1.70460691 | 0.31086033  | -2.35085266 |
| F | 0.49608259  | 1.90804303  | -2.35060998 |
| F | 1.59791795  | 2.70422102  | 0.00440165  |
| F | 0.49906543  | 1.90321749  | 2.35917060  |
| F | -1.70162407 | 0.30603480  | 2.35892793  |

28

C6H5-OMe...perfluorobenzene Dimer

|   |             |             |             |
|---|-------------|-------------|-------------|
| C | 0.87173112  | -2.19960963 | -0.17085266 |
| C | 1.06614663  | -1.86071297 | 1.16837067  |
| C | 1.59132128  | -1.53901851 | -1.17226568 |
| C | 2.70251443  | -0.19771154 | 0.50470173  |
| C | 2.49842769  | -0.54667609 | -0.83299997 |
| C | 1.98410010  | -0.85838011 | 1.49286962  |
| H | 0.52108052  | -2.35797033 | 1.95820561  |
| H | 2.13052985  | -0.59983293 | 2.53463139  |
| H | 3.05061631  | -0.04120078 | -1.61589458 |
| H | 1.41901887  | -1.82373407 | -2.20227614 |
| O | 0.00470319  | -3.15865535 | -0.60097213 |
| C | -0.74594054 | -3.85428950 | 0.37807416  |
| H | -1.38415077 | -3.16890822 | 0.94149959  |
| H | -0.08858304 | -4.39496674 | 1.06368136  |
| H | -1.36394535 | -4.56173717 | -0.16787600 |
| H | 3.41109162  | 0.57721443  | 0.76738289  |
| C | -1.65940992 | 0.20587989  | -0.40959880 |
| C | -0.94694545 | 0.85950048  | -1.40540108 |
| C | -0.03801494 | 1.85338397  | -1.07001323 |
| C | 0.15845241  | 2.19364830  | 0.26117737  |
| C | -0.55401206 | 1.54002771  | 1.25697965  |
| C | -1.46294257 | 0.54614423  | 0.92159180  |
| F | -2.53118725 | -0.74737791 | -0.73127744 |

|   |             |             |             |
|---|-------------|-------------|-------------|
| F | -1.13538227 | 0.53314455  | -2.68217749 |
| F | 0.64532688  | 2.48028727  | -2.02511053 |
| F | 1.03022975  | 3.14690611  | 0.58285601  |
| F | -0.36557523 | 1.86638365  | 2.53375606  |
| F | -2.14628439 | -0.08075908 | 1.87668910  |

28

C6H5-SCH3...perfluorobenzene Dimer

|   |             |             |             |
|---|-------------|-------------|-------------|
| C | 1.01589252  | -1.98473404 | -0.04283796 |
| C | 1.12041429  | -1.59717815 | 1.29434174  |
| C | 1.77394617  | -1.31255786 | -1.01111247 |
| C | 2.72397528  | 0.11453446  | 0.69153134  |
| C | 2.61887157  | -0.27352475 | -0.64484174 |
| C | 1.97234071  | -0.55173457 | 1.65268027  |
| H | 0.54832937  | -2.09660010 | 2.06424363  |
| H | 2.04297878  | -0.26215106 | 2.69435354  |
| H | 3.19767170  | 0.23528543  | -1.40619517 |
| H | 1.69681494  | -1.60922117 | -2.05108648 |
| S | -0.02564292 | -3.29247127 | -0.62863212 |
| C | -0.81068337 | -3.88533978 | 0.88900793  |
| H | -1.41009928 | -3.10559883 | 1.35814857  |
| H | -0.07480091 | -4.27402577 | 1.59241999  |
| H | -1.46807075 | -4.69801739 | 0.58275582  |
| H | 3.38309819  | 0.92488739  | 0.97629689  |
| C | -1.62313196 | 0.34438733  | -0.50487125 |
| C | -0.87713100 | 1.00292366  | -1.47247661 |
| C | -0.03171274 | 2.04195991  | -1.10899937 |
| C | 0.06770577  | 2.42246133  | 0.22208375  |
| C | -0.67829519 | 1.76392501  | 1.18968911  |
| C | -1.52371345 | 0.72488875  | 0.82621187  |
| F | -2.43399315 | -0.65217759 | -0.85349111 |
| F | -0.97248597 | 0.63797536  | -2.74914995 |
| F | 0.68379470  | 2.67357803  | -2.03705233 |
| F | 0.87856696  | 3.41902625  | 0.57070361  |
| F | -0.58294022 | 2.12887330  | 2.46636245  |
| F | -2.23922089 | 0.09327063  | 1.75426483  |

25

C6H5-SH...perfluorobenzene Dimer

|   |            |             |             |
|---|------------|-------------|-------------|
| C | 0.78421120 | -2.26867743 | -0.01573676 |
| C | 1.27451956 | -1.78182088 | 1.19908910  |
| C | 1.28765232 | -1.21527148 | -1.76190040 |
| C | 2.76249254 | -0.29062236 | 0.01310707  |
| C | 2.27240107 | -0.77727867 | -1.19579645 |
| C | 2.25811957 | -0.79832059 | 1.20888209  |
| H | 0.91579636 | -2.13106235 | -2.16368216 |
| H | 2.65488930 | -0.39218322 | -2.13302560 |
| H | 2.63058682 | -0.42854422 | 2.15616064  |
| H | 0.88695597 | -2.17198119 | 2.13271314  |

|   |             |             |             |
|---|-------------|-------------|-------------|
| S | -0.47009142 | -3.52306383 | 0.04679868  |
| H | -0.61000473 | -3.65923651 | -1.27989092 |
| H | 3.52779773  | 0.47459618  | 0.02395239  |
| C | -1.71834272 | 0.24921499  | -0.00820577 |
| C | -1.22054727 | 0.75033342  | -1.20299766 |
| C | -0.23910455 | 1.73166388  | -1.18868799 |
| C | 0.24454414  | 2.21187733  | 0.02041360  |
| C | -0.25325132 | 1.71075891  | 1.21520549  |
| C | -1.23469404 | 0.72942844  | 1.20089582  |
| F | -2.65966829 | -0.69200291 | -0.02193053 |
| F | -1.68442651 | 0.28974899  | -2.36267550 |
| F | 0.23834319  | 2.21229877  | -2.33464105 |
| F | 1.18586970  | 3.15309523  | 0.03413836  |
| F | 0.21062792  | 2.17134333  | 2.37488333  |
| F | -1.71214178 | 0.24879356  | 2.34684888  |

27

C6H5-SiF3...perfluorobenzene Dimer

|    |             |             |             |
|----|-------------|-------------|-------------|
| C  | 1.11306383  | -1.71135991 | 0.00316285  |
| C  | 1.57755036  | -1.17758613 | 1.21293200  |
| C  | 1.59035257  | -1.18406781 | -1.20449137 |
| C  | 2.95567250  | 0.39058470  | 0.00725393  |
| C  | 2.50646891  | -0.13634855 | -1.20203894 |
| C  | 2.49370724  | -0.12985816 | 1.21451552  |
| Si | -0.10743584 | -3.07579031 | 0.00031288  |
| F  | -1.62557705 | -2.57752110 | -0.01725311 |
| F  | 0.04795376  | -3.98408607 | 1.30508252  |
| F  | 0.07179241  | -4.00078054 | -1.28958985 |
| H  | 1.25302244  | -1.59596122 | -2.14867726 |
| H  | 1.23018923  | -1.58441855 | 2.15565500  |
| H  | 2.87141504  | 0.26468409  | -2.13906118 |
| H  | 2.84875855  | 0.27618980  | 2.15317849  |
| H  | 3.66954473  | 1.20490732  | 0.00883492  |
| C  | -1.69535198 | 0.77016728  | -0.00432552 |
| C  | -1.23491111 | 1.29175739  | -1.20531911 |
| C  | -0.31997360 | 2.33546678  | -1.20328771 |
| C  | 0.13452436  | 2.85758756  | -0.00026271 |
| C  | -0.32591650 | 2.33599744  | 1.20073088  |
| C  | -1.24085402 | 1.29228805  | 1.19869948  |
| F  | -2.57289078 | -0.23087976 | -0.00627389 |
| F  | -1.67083118 | 0.79097864  | -2.35916875 |
| F  | 0.12164645  | 2.83573656  | -2.35518898 |
| F  | 1.01206316  | 3.85863459  | 0.00168566  |
| F  | 0.11000357  | 2.83677620  | 2.35458052  |
| F  | -1.68247406 | 0.79201827  | 2.35060075  |

27

C6H5-SiH3...perfluorobenzene Dimer

|   |            |             |            |
|---|------------|-------------|------------|
| C | 0.83044763 | -2.24659147 | 0.00338308 |
|---|------------|-------------|------------|



|    |             |             |             |   |             |             |             |
|----|-------------|-------------|-------------|---|-------------|-------------|-------------|
| C  | 1.32024596  | -1.72324510 | 1.20726180  | C | -0.56264807 | -1.52765949 | 1.29595594  |
| C  | 1.33322919  | -1.72937855 | -1.19782744 | F | 1.03033793  | -3.14691450 | 0.67407831  |
| C  | 2.78099837  | 0.00872842  | 0.00872842  | F | 0.65655361  | -2.55330948 | -1.95307580 |
| C  | 2.30161692  | -0.72776572 | -1.19830765 | F | -1.12722447 | -0.63105876 | -2.67218274 |
| C  | 2.28861459  | -0.72157488 | 1.21305754  | F | -2.53721692 | 0.69758554  | -0.76413506 |
| Si | -0.45053150 | -3.61767611 | -0.00005133 | F | -2.16343260 | 0.10398052  | 1.86301905  |
| H  | 0.19090058  | -4.96207599 | -0.00084544 | F | -0.37965452 | -1.81827021 | 2.58212600  |
| H  | -1.30078997 | -3.51009620 | 1.21696595  |   |             |             |             |
| H  | -1.29775105 | -3.50767229 | -1.21898539 |   |             |             |             |
| H  | 0.96423534  | -2.10706568 | -2.14559007 |   |             |             |             |
| H  | 0.94102366  | -2.09611795 | 2.15287594  |   |             |             |             |
| H  | 2.67776114  | -0.33953661 | -2.13704177 |   |             |             |             |
| H  | 2.65459959  | -0.32852816 | 2.15379934  |   |             |             |             |
| H  | 3.53203427  | 0.55715023  | 0.01077405  |   |             |             |             |
| C  | -1.70983020 | 0.23603181  | -0.00540668 |   |             |             |             |
| C  | -1.22443168 | 0.73521743  | -1.20609384 |   |             |             |             |
| C  | -0.26110760 | 1.73443903  | -1.20345392 |   |             |             |             |
| C  | 0.21681935  | 2.23447646  | -0.00012684 |   |             |             |             |
| C  | -0.26857918 | 1.73529085  | 1.20056032  |   |             |             |             |
| C  | -1.23190326 | 0.73606925  | 1.19792040  |   |             |             |             |
| F  | -2.63377774 | -0.72234591 | -0.00793869 |   |             |             |             |
| F  | -1.68282305 | 0.25561934  | -2.36023321 |   |             |             |             |
| F  | 0.20444995  | 2.21322011  | -2.35506127 |   |             |             |             |
| F  | 1.14076688  | 3.19285418  | 0.00240517  |   |             |             |             |
| F  | 0.18981220  | 2.21488893  | 2.35469968  |   |             |             |             |
| F  | -1.69746081 | 0.25728817  | 2.34952775  |   |             |             |             |

28

C6H5-CH2OH...perfluorobenzene Dimer

|   |             |             |             |
|---|-------------|-------------|-------------|
| C | 2.72659697  | 0.23609672  | 0.51439671  |
| C | 2.00119084  | 0.92050309  | 1.48498362  |
| C | 2.53341428  | 0.54206717  | -0.83272456 |
| C | 0.89079326  | 2.21441176  | -0.22568369 |
| C | 1.62044775  | 1.52568555  | -1.19791052 |
| C | 1.08525139  | 1.90730199  | 1.11889993  |
| H | 3.09291048  | 0.01533057  | -1.59608303 |
| H | 2.14607278  | 0.68812397  | 2.53304964  |
| C | -0.09046744 | 3.27490909  | -0.66101453 |
| H | -0.83814141 | 2.82275190  | -1.32206384 |
| H | 0.44248084  | 4.04639124  | -1.22778618 |
| H | 1.47286372  | 1.76099946  | -2.24736346 |
| H | 0.51901229  | 2.44213747  | 1.86873463  |
| H | 3.43671636  | -0.52925886 | 0.80210548  |
| O | -0.71569455 | 3.84132882  | 0.48014966  |
| H | -1.34016623 | 4.51684479  | 0.19508122  |
| C | 0.15705814  | -2.20584301 | 0.32202692  |
| C | -0.03373394 | -1.90284730 | -1.01895766 |
| C | -0.94423093 | -0.92166947 | -1.38601268 |
| C | -1.66393714 | -0.24348595 | -0.41208366 |
| C | -1.47314505 | -0.54648167 | 0.92890091  |

### H-X...C<sub>6</sub>H<sub>6</sub> Dimers

14

H-H...benzene Dimer

|   |            |            |            |
|---|------------|------------|------------|
| C | 0.3172112  | -0.5430211 | 1.2070613  |
| C | -0.0089199 | 0.8120809  | 1.2070613  |
| C | 0.4802767  | -1.2205720 | 0.0000000  |
| C | -0.0089199 | 0.8120809  | -1.2070613 |
| C | 0.3172112  | -0.5430211 | -1.2070613 |
| C | -0.1719854 | 1.4896318  | 0.0000000  |
| H | 0.4439287  | -1.0695431 | 2.1450636  |
| H | -0.1356374 | 1.3386029  | 2.1450636  |
| H | -0.4254204 | 2.5426759  | 0.0000000  |
| H | -0.1356374 | 1.3386029  | -2.1450636 |
| H | 0.4439287  | -1.0695431 | -2.1450636 |
| H | 0.7337118  | -2.2736161 | 0.0000000  |
| H | -3.1552462 | -3.2095678 | 0.0000000  |
| H | -3.3283512 | -2.4903020 | 0.0000000  |

16

H-BF<sub>2</sub>...benzene Dimer

|   |            |            |            |
|---|------------|------------|------------|
| F | 0.0439425  | 3.4777580  | 1.1345510  |
| F | 0.0439425  | 3.4777580  | -1.1345510 |
| B | 0.5434198  | 2.9878311  | 0.0000000  |
| C | 0.8778294  | -2.8731792 | 0.0000000  |
| C | 0.3803163  | -2.3851791 | -1.2070584 |
| C | -0.6147098 | -1.4091789 | -1.2070584 |
| C | -1.1122228 | -0.9211788 | 0.0000000  |
| C | -0.6147098 | -1.4091789 | 1.2070584  |
| C | 0.3803163  | -2.3851791 | 1.2070584  |
| H | 1.6509528  | -3.6315197 | 0.0000000  |
| H | 0.7668780  | -2.7643493 | -2.1449284 |
| H | -1.0012715 | -1.0300086 | -2.1449284 |
| H | -1.8853462 | -0.1628382 | 0.0000000  |
| H | -1.0012715 | -1.0300086 | 2.1449284  |
| H | 0.7668780  | -2.7643493 | 2.1449284  |
| H | 1.3905961  | 2.1568537  | 0.0000000  |

16

H-CCH...benzene Dimer

|   |            |            |            |
|---|------------|------------|------------|
| C | -0.7821343 | 3.4439793  | 0.0000000  |
| C | 0.0434238  | 4.3255255  | 0.0000000  |
| C | 1.0796103  | -0.2735384 | 0.0000000  |
| C | 0.6032486  | -0.7822062 | -1.2070584 |
| C | -0.3494748 | -1.7995417 | -1.2070584 |
| C | -0.8258364 | -2.3082095 | 0.0000000  |
| C | -0.3494748 | -1.7995417 | 1.2070584  |
| C | 0.6032486  | -0.7822062 | 1.2070584  |
| H | 1.8198649  | 0.5169191  | 0.0000000  |

|   |            |            |            |
|---|------------|------------|------------|
| H | 0.9733759  | -0.3869774 | -2.1449284 |
| H | -0.7196021 | -2.1947705 | -2.1449284 |
| H | -1.5660911 | -3.0986671 | 0.0000000  |
| H | -0.7196021 | -2.1947705 | 2.1449284  |
| H | 0.9733759  | -0.3869774 | 2.1449284  |
| H | 0.7718709  | 5.1033747  | 0.0000000  |
| H | -1.5110081 | 2.6656744  | 0.0000000  |

17

H-CF<sub>3</sub>...benzene Dimer

|   |            |            |            |
|---|------------|------------|------------|
| C | -0.0001136 | 2.6033790  | 0.3641009  |
| F | -1.0964285 | 3.3871077  | 0.3678682  |
| F | 0.0222056  | 1.9769062  | -0.8336019 |
| F | 1.0743950  | 3.4162415  | 0.3930817  |
| C | -0.0000113 | -3.2102122 | 0.9877744  |
| C | -1.2070720 | -2.7539391 | 0.4610175  |
| C | -1.2070765 | -1.8416509 | -0.5927299 |
| C | -0.0000203 | -1.3856357 | -1.1197204 |
| C | 1.2070403  | -1.8419088 | -0.5929635 |
| C | 1.2070448  | -2.7541970 | 0.4607839  |
| H | -0.0000078 | -3.9190492 | 1.8065236  |
| H | -2.1449402 | -3.1082574 | 0.8704828  |
| H | -2.1449482 | -1.4871322 | -1.0020137 |
| H | -0.0000238 | -0.6767987 | -1.9384696 |
| H | 2.1449086  | -1.4875904 | -1.0024288 |
| H | 2.1449166  | -3.1087157 | 0.8700677  |
| H | -0.0001982 | 1.8983789  | 1.1860591  |

17

H-CH<sub>3</sub>...benzene Dimer

|   |            |            |            |
|---|------------|------------|------------|
| C | -0.0000127 | 3.9409218  | 0.5540618  |
| H | -0.8902255 | 4.5689066  | 0.6153991  |
| H | 0.0120953  | 3.4763276  | -0.4357087 |
| H | 0.8783975  | 4.5837451  | 0.6300702  |
| C | -0.0001086 | -1.9123931 | 0.8669585  |
| C | -1.2071134 | -1.4255934 | 0.3681411  |
| C | -1.2070061 | -0.4521262 | -0.6293633 |
| C | 0.0001060  | 0.0345412  | -1.1280503 |
| C | 1.2071107  | -0.4522586 | -0.6292329 |
| C | 1.2070034  | -1.4257258 | 0.3682715  |
| H | -0.0001920 | -2.6687655 | 1.6420075  |
| H | -2.1450251 | -1.8037281 | 0.7556149  |
| H | -2.1448344 | -0.0738885 | -1.0169385 |
| H | 0.0001893  | 0.7909136  | -1.9030993 |
| H | 2.1450224  | -0.0741238 | -1.0167067 |
| H | 2.1448318  | -1.8039634 | 0.7558467  |
| H | -0.0001331 | 3.1837104  | 1.3343582  |

16  
H-CHO...benzene Dimer  
C -0.5045020 3.4082737 -0.5537152  
O 0.4222865 3.9964288 -0.0416273  
H -1.5422988 3.6142410 -0.2360816  
C 0.1582100 -2.3568813 -0.8762593  
C 1.2974598 -1.7427431 -0.3589611  
C 1.1769202 -0.7819346 0.6435211  
C -0.0828693 -0.4352642 1.1287051  
C -1.2221191 -1.0494024 0.6114069  
C -1.1015795 -2.0102109 -0.3910753  
H 0.2518679 -3.1034180 -1.6551760  
H 2.2763012 -2.0121018 -0.7359432  
H 2.0621037 -0.3047565 1.0454557  
H -0.1765272 0.3112725 1.9076218  
H -2.2009606 -0.7800437 0.9883891  
H -1.9867630 -2.4873890 -0.7930098  
H -0.3986248 2.6514179 -1.3445076

15  
H-CN...benzene Dimer  
C -0.7219643 3.4370631 0.0000000  
N 0.0726297 4.2769415 0.0000000  
C -0.8263385 -2.2752798 0.0000000  
C -0.3473957 -1.7690416 1.2070584  
C 0.6104901 -0.7565653 1.2070584  
C 1.0894329 -0.2503272 0.0000000  
C 0.6104901 -0.7565653 -1.2070584  
C -0.3473957 -1.7690416 -1.2070584  
H -1.5706043 -3.0619618 0.0000000  
H -0.7195286 -2.1623827 2.1449284  
H 0.9826230 -0.3632243 2.1449284  
H 1.8336988 0.5363548 0.0000000  
H 0.9826230 -0.3632243 -2.1449284  
H -0.7195286 -2.1623827 -2.1449284  
H -1.4570777 2.6600550 0.0000000

19  
H-COCH3...benzene Dimer  
C 0.1465015 -2.9713785 -0.5333791  
O 1.2027267 -3.3639114 -0.0754099  
C -1.1670666 -3.5215111 -0.0249433  
H -1.7270347 -3.9931356 -0.8357102  
H -1.7855081 -2.7217479 0.3888753  
H -0.9549634 -4.2563587 0.7481172  
C -0.0066070 0.9134626 1.1230100  
C 1.2128767 1.4099250 0.6658032  
C 1.2394909 2.3772922 -0.3372649  
C 0.0466216 2.8481971 -0.8831262

C -1.1728621 2.3517348 -0.4259194  
C -1.1994764 1.3843675 0.5771487  
H -0.0272860 0.1618298 1.9023820  
H 2.1397220 1.0440375 1.0899310  
H 2.1870152 2.7630375 -0.6925091  
H 0.0673005 3.5998300 -1.6624982  
H -2.0997074 2.7176223 -0.8500471  
H -2.1470007 0.9986222 0.9323930  
H 0.1297288 -2.2080796 -1.3266513

20  
H-COOCH3...benzene Dimer  
C 0.4863046 2.4315008 -0.7114219  
O 1.4773354 2.8211469 -0.1343969  
O -0.7367086 2.9371220 -0.4809806  
C -0.7852830 3.9786779 0.5041484  
H -1.8295298 4.2689803 0.5657924  
H -0.4281385 3.6027235 1.4610624  
H -0.1656569 4.8166920 0.1905018  
C -0.1013878 -1.3405875 1.0868540  
C -1.2698177 -1.7547502 0.4497559  
C -1.2205728 -2.7669350 -0.5071716  
C -0.0028980 -3.3649570 -0.8270011  
C 1.1655320 -2.9507943 -0.1899030  
C 1.1162871 -1.9386096 0.7670246  
H -0.1396505 -0.5541320 1.8303753  
H -2.2159366 -1.2900942 0.6982596  
H -2.1284290 -3.0887345 -1.0021893  
H 0.0353648 -4.1514125 -1.5705224  
H 2.1116509 -3.4154503 -0.4384066  
H 2.0241433 -1.6168101 1.2620422  
H 0.4833960 1.6431120 -1.4652960

17  
H-COOH...benzene Dimer  
C 0.1028553 -2.9467461 0.5169227  
O 1.1243068 -3.3926583 0.0461985  
O -1.1134694 -3.3581778 0.0987486  
H -0.9591835 -4.0222122 -0.5920092  
C -0.0077865 2.8205274 0.8843974  
C 1.2055190 2.3492818 0.3859288  
C 1.2181445 1.3825984 -0.6180717  
C 0.0174647 0.8871606 -1.1236038  
C -1.1958407 1.3584062 -0.6251353  
C -1.2084663 2.3250896 0.3788653  
H -0.0175964 3.5716289 1.6644938  
H 2.1384329 2.7342310 0.7787212  
H 2.1608684 1.0164461 -1.0053759  
H 0.0272746 0.1360591 -1.9037003

|   |            |            |            |
|---|------------|------------|------------|
| H | -2.1287547 | 0.9734570  | -1.0179276 |
| H | -2.1511902 | 2.6912418  | 0.7661694  |
| H | 0.0549946  | -2.1917250 | 1.3013744  |

14

H-F...benzene Dimer

|   |            |            |            |
|---|------------|------------|------------|
| F | -0.4187881 | -3.8617588 | 0.0000000  |
| C | 1.1722208  | -0.0114667 | 0.0000000  |
| C | 0.6461457  | 0.4455981  | 1.2070584  |
| C | -0.4060046 | 1.3597279  | 1.2070584  |
| C | -0.9320797 | 1.8167927  | 0.0000000  |
| C | -0.4060046 | 1.3597279  | -1.2070584 |
| C | 0.6461457  | 0.4455981  | -1.2070584 |
| H | 1.9897291  | -0.7217346 | 0.0000000  |
| H | 1.0548998  | 0.0904642  | 2.1449284  |
| H | -0.8147587 | 1.7148618  | 2.1449284  |
| H | -1.7495880 | 2.5270606  | 0.0000000  |
| H | -0.8147587 | 1.7148618  | -2.1449284 |
| H | 1.0548998  | 0.0904642  | -2.1449284 |
| H | -1.1233009 | -3.2496637 | 0.0000000  |

22

H-NCH3\_2...benzene Dimer

|   |            |            |            |
|---|------------|------------|------------|
| N | 0.3882151  | -2.7677906 | 0.0000000  |
| C | 0.0907220  | -3.4674554 | 1.2349280  |
| H | -0.7369137 | -4.1516503 | 1.0591355  |
| H | -0.2231413 | -2.7653732 | 2.0086125  |
| H | 0.9488095  | -4.0411396 | 1.6108450  |
| C | 0.0907220  | -3.4674554 | -1.2349280 |
| H | -0.2231413 | -2.7653732 | -2.0086125 |
| H | -0.7369137 | -4.1516503 | -1.0591355 |
| H | 0.9488095  | -4.0411396 | -1.6108450 |
| C | -1.1577623 | 1.0962280  | 0.0000000  |
| C | -0.6377188 | 1.5601441  | -1.2070584 |
| C | 0.4023682  | 2.4879762  | -1.2070584 |
| C | 0.9224117  | 2.9518923  | 0.0000000  |
| C | 0.4023682  | 2.4879762  | 1.2070584  |
| C | -0.6377188 | 1.5601441  | 1.2070584  |
| H | -1.9658975 | 0.3753136  | 0.0000000  |
| H | -1.0417864 | 1.1996869  | -2.1449284 |
| H | 0.8064358  | 2.8484335  | -2.1449284 |
| H | 1.7305468  | 3.6728068  | 0.0000000  |
| H | 0.8064358  | 2.8484335  | 2.1449284  |
| H | -1.0417864 | 1.1996869  | 2.1449284  |
| H | 1.1528542  | -2.1163127 | 0.0000000  |

16

H-NH2...benzene Dimer

|   |            |            |            |
|---|------------|------------|------------|
| H | 0.4435332  | 4.3292393  | 0.8344900  |
| H | 0.4435332  | 4.3292393  | -0.8344900 |
| N | 0.5091224  | 3.7669005  | 0.0000000  |
| C | -1.1334490 | 0.0661030  | 0.0000000  |
| C | -0.6347394 | -0.4206742 | 1.2070584  |
| C | 0.3626798  | -1.3942287 | 1.2070584  |
| C | 0.8613893  | -1.8810060 | 0.0000000  |
| C | 0.3626798  | -1.3942287 | -1.2070584 |
| C | -0.6347394 | -0.4206742 | -1.2070584 |
| H | -1.9084318 | 0.8225433  | 0.0000000  |
| H | -1.0222308 | -0.0424541 | 2.1449284  |
| H | 0.7501712  | -1.7724488 | 2.1449284  |
| H | 1.6363721  | -2.6374462 | 0.0000000  |
| H | 0.7501712  | -1.7724488 | -2.1449284 |
| H | -1.0222308 | -0.0424541 | -2.1449284 |
| H | 1.2557995  | 3.0937041  | 0.0000000  |

19

H-NHCH3...benzene Dimer

|   |            |            |            |
|---|------------|------------|------------|
| N | 0.6052095  | 3.1426292  | -0.4683775 |
| H | 1.5268831  | 3.5459581  | -0.4282726 |
| C | -0.4686574 | 4.0321496  | -0.0780823 |
| H | -0.0883991 | 4.7271787  | 0.6686312  |
| H | -1.2811886 | 3.4649757  | 0.3796073  |
| H | -0.8748773 | 4.6040414  | -0.9218307 |
| C | 0.1188570  | -0.6071629 | 1.1433595  |
| C | -1.1511565 | -0.9206837 | 0.6622944  |
| C | -1.2981912 | -1.8614892 | -0.3555067 |
| C | -0.1752123 | -2.4887739 | -0.8922428 |
| C | 1.0948013  | -2.1752531 | -0.4111778 |
| C | 1.2418359  | -1.2344476 | 0.6066234  |
| H | 0.2331012  | 0.1238317  | 1.9341789  |
| H | -2.0236978 | -0.4332909 | 1.0793320  |
| H | -2.2849766 | -2.1050910 | -0.7292886 |
| H | -0.2894565 | -3.2197685 | -1.6830622 |
| H | 1.9673425  | -2.6626459 | -0.8282153 |
| H | 2.2286214  | -0.9908457 | 0.9804052  |
| H | 0.4776458  | 2.4873306  | -1.2188356 |

17

H-NHOH...benzene Dimer

|   |            |            |            |
|---|------------|------------|------------|
| N | 0.6184157  | 3.1790370  | -0.3838323 |
| H | 1.4096138  | 3.7884524  | -0.5549207 |
| O | -0.4803230 | 4.0295795  | -0.1572175 |
| H | -0.7518766 | 3.8207461  | 0.7453577  |
| C | -0.1933769 | -2.4574661 | -0.9191097 |
| C | 1.0803986  | -2.1543535 | -0.4413314 |
| C | 1.2354907  | -1.2358861 | 0.5954991  |
| C | 0.1168073  | -0.6205314 | 1.1545512  |

|   |            |            |            |
|---|------------|------------|------------|
| C | -1.1569682 | -0.9236440 | 0.6767730  |
| C | -1.3120603 | -1.8421114 | -0.3600576 |
| H | -0.3138816 | -3.1711043 | -1.7247147 |
| H | 1.9496023  | -2.6324768 | -0.8757083 |
| H | 2.2251991  | -1.0003712 | 0.9667271  |
| H | 0.2373120  | 0.0931068  | 1.9601562  |
| H | -2.0261719 | -0.4455207 | 1.1111498  |
| H | -2.3017687 | -2.0776262 | -0.7312856 |
| H | 0.4682438  | 2.5566932  | -1.1669369 |

15

H-NO...benzene Dimer

|   |            |            |            |
|---|------------|------------|------------|
| N | 0.5770619  | 3.3095052  | -0.4914911 |
| O | -0.4236091 | 3.8261706  | -0.0609049 |
| C | 0.0857262  | -0.3778691 | 1.1291211  |
| C | -1.1697581 | -0.7310820 | 0.6375386  |
| C | -1.2802583 | -1.6931251 | -0.3649164 |
| C | -0.1352743 | -2.3019553 | -0.8757890 |
| C | 1.1202099  | -1.9487425 | -0.3842065 |
| C | 1.2307102  | -0.9866994 | 0.6182485  |
| H | 0.1715836  | 0.3696269  | 1.9080167  |
| H | -2.0593970 | -0.2580282 | 1.0344805  |
| H | -2.2557546 | -1.9675673 | -0.7468702 |
| H | -0.2211317 | -3.0494513 | -1.6546846 |
| H | 2.0098488  | -2.4217963 | -0.7811484 |
| H | 2.2062065  | -0.7122572 | 1.0002023  |
| H | 0.4146960  | 2.5954792  | -1.2436811 |

16

H-NO2...benzene Dimer

|   |            |            |            |
|---|------------|------------|------------|
| O | -0.0430560 | 3.3252244  | 1.0779960  |
| O | -0.0430560 | 3.3252244  | -1.0779960 |
| N | -0.4532710 | 2.9386589  | 0.0000000  |
| C | 1.1379356  | -0.8519730 | 0.0000000  |
| C | 0.6307532  | -1.3299158 | -1.2070584 |
| C | -0.3836117 | -2.2858014 | -1.2070584 |
| C | -0.8907941 | -2.7637442 | 0.0000000  |
| C | -0.3836117 | -2.2858014 | 1.2070584  |
| C | 0.6307532  | -1.3299158 | 1.2070584  |
| H | 1.9260851  | -0.1092613 | 0.0000000  |
| H | 1.0248279  | -0.9585600 | -2.1449284 |
| H | -0.7776864 | -2.6571573 | -2.1449284 |
| H | -1.6789435 | -3.5064559 | 0.0000000  |
| H | -0.7776864 | -2.6571573 | 2.1449284  |
| H | 1.0248279  | -0.9585600 | 2.1449284  |
| H | -1.2062945 | 2.2290480  | 0.0000000  |

18

H-OCF3...benzene Dimer

|   |            |            |            |
|---|------------|------------|------------|
| C | -0.0233340 | 2.6637272  | 0.1151640  |
| O | -0.8554882 | 1.9002823  | 0.8416376  |
| F | 0.7807542  | 1.9401269  | -0.6849643 |
| F | 0.7730311  | 3.4352214  | 0.8773711  |
| F | -0.7616779 | 3.4612084  | -0.6516446 |
| C | -0.3541079 | -1.6941214 | -1.0450563 |
| C | 0.9927255  | -1.9499549 | -0.7935757 |
| C | 1.3554956  | -2.9213427 | 0.1377980  |
| C | 0.3714322  | -3.6368969 | 0.8176913  |
| C | -0.9754011 | -3.3810635 | 0.5662107  |
| C | -1.3381712 | -2.4096757 | -0.3651630 |
| H | -0.6359759 | -0.9393647 | -1.7687226 |
| H | 1.7573310  | -1.3939778 | -1.3218447 |
| H | 2.4019690  | -3.1201222 | 0.3331954  |
| H | 0.6533002  | -4.3916536 | 1.5413576  |
| H | -1.7400066 | -3.9370406 | 1.0944797  |
| H | -2.3846447 | -2.2108961 | -0.5605604 |
| H | -0.5158876 | 1.2488638  | 1.4666986  |

15

H-OH...benzene Dimer

|   |            |            |            |
|---|------------|------------|------------|
| O | 0.0664761  | 3.8321015  | 0.4937551  |
| H | -0.8280522 | 4.0809674  | 0.2312551  |
| C | -0.0036432 | 0.0431464  | -1.1518626 |
| C | 1.2083479  | -0.4285453 | -0.6506265 |
| C | 1.2183077  | -1.3744203 | 0.3730310  |
| C | 0.0162763  | -1.8486035 | 0.8954524  |
| C | -1.1957148 | -1.3769119 | 0.3942163  |
| C | -1.2056746 | -0.4310369 | -0.6294412 |
| H | -0.0113819 | 0.7780799  | -1.9472323 |
| H | 2.1423120  | -0.0601105 | -1.0565417 |
| H | 2.1600105  | -1.7409191 | 0.7624855  |
| H | 0.0240150  | -2.5835371 | 1.6908221  |
| H | -2.1296789 | -1.7453466 | 0.8001315  |
| H | -2.1473774 | -0.0645381 | -1.0188957 |
| H | 0.0311049  | 3.1799039  | 1.1999087  |

18

H-OMe...benzene Dimer

|   |            |            |            |
|---|------------|------------|------------|
| O | 0.6650040  | -3.2106439 | 0.5292241  |
| C | -0.4797996 | -3.8605144 | 0.0067325  |
| H | -1.1741595 | -3.1383915 | -0.4302010 |
| H | -0.9883199 | -4.4399278 | 0.7814552  |
| H | -0.1148082 | -4.5294070 | -0.7677594 |
| C | 0.0684030  | 0.5711090  | -1.1455972 |
| C | -1.1723513 | 0.8997381  | -0.6022879 |
| C | -1.2573358 | 1.8411561  | 0.4219987  |
| C | -0.1015660 | 2.4539451  | 0.9029760  |

|   |            |            |            |
|---|------------|------------|------------|
| C | 1.1391884  | 2.1253159  | 0.3596667  |
| C | 1.2241728  | 1.1838979  | -0.6646199 |
| H | 0.1344349  | -0.1603616 | -1.9414557 |
| H | -2.0703707 | 0.4236085  | -0.9760016 |
| H | -2.2213871 | 2.0964970  | 0.8441435  |
| H | -0.1675979 | 3.1854156  | 1.6988345  |
| H | 2.0372078  | 2.6014456  | 0.7333804  |
| H | 2.1882242  | 0.9285570  | -1.0867647 |
| H | 0.5328740  | -2.5720756 | 1.2354267  |

18

H-SCH3...benzene Dimer

|   |            |            |            |
|---|------------|------------|------------|
| S | 0.6561372  | -2.9806860 | 0.2607837  |
| C | -1.0435348 | -3.5268922 | -0.0286755 |
| H | -1.6715321 | -2.7070899 | -0.3764280 |
| H | -1.4727636 | -3.9825681 | 0.8632384  |
| H | -0.9815980 | -4.2798344 | -0.8132998 |
| C | 0.0367222  | 0.9814645  | -1.1216011 |
| C | -1.1876794 | 1.3375893  | -0.5588675 |
| C | -1.2389443 | 2.3042432  | 0.4439312  |
| C | -0.0658074 | 2.9147725  | 0.8839965  |
| C | 1.1585942  | 2.5586477  | 0.3212629  |
| C | 1.2098591  | 1.5919937  | -0.6815359 |
| H | 0.0765544  | 0.2303859  | -1.9007638 |
| H | -2.0991928 | 0.8632154  | -0.9007929 |
| H | -2.1902898 | 2.5809480  | 0.8811685  |
| H | -0.1056396 | 3.6658511  | 1.6631591  |
| H | 2.0701076  | 3.0330216  | 0.6631883  |
| H | 2.1612046  | 1.3152890  | -1.1187731 |
| H | 0.5099732  | -2.0622698 | 1.2291673  |

15

H-SH...benzene Dimer

|   |            |            |            |
|---|------------|------------|------------|
| S | 0.0536782  | 3.4975344  | 0.2321510  |
| H | -1.2740484 | 3.6304805  | 0.0991421  |
| C | -0.0123139 | -0.5181761 | -1.1317430 |
| C | 1.2055639  | -0.9883842 | -0.6435511 |
| C | 1.2275170  | -1.9488492 | 0.3662402  |
| C | 0.0315924  | -2.4391061 | 0.8878395  |
| C | -1.1862854 | -1.9688979 | 0.3996476  |
| C | -1.2082385 | -1.0084329 | -0.6101437 |
| H | -0.0293712 | 0.2280938  | -1.9163388 |
| H | 2.1347831  | -0.6074605 | -1.0488276 |
| H | 2.1737936  | -2.3141954 | 0.7455595  |
| H | 0.0486497  | -3.1853760 | 1.6724353  |
| H | -2.1155046 | -2.3498216 | 0.8049240  |
| H | -2.1545151 | -0.6430868 | -0.9894630 |
| H | 0.0137439  | 2.5742965  | 1.2031150  |

17

H-SiF3...benzene Dimer

|    |            |            |            |
|----|------------|------------|------------|
| Si | -0.0001241 | 2.4185999  | -0.3076051 |
| F  | 0.0138481  | 1.7836320  | 1.1586671  |
| F  | -1.3043691 | 3.3378049  | -0.3822911 |
| F  | 1.2903544  | 3.3555990  | -0.3985815 |
| C  | 0.0001914  | -1.6974365 | 1.0640328  |
| C  | -1.2069202 | -2.1773617 | 0.5588529  |
| C  | -1.2070265 | -3.1370752 | -0.4518911 |
| C  | -0.0000213 | -3.6168635 | -0.9574550 |
| C  | 1.2070902  | -3.1369383 | -0.4522751 |
| C  | 1.2071966  | -2.1772248 | 0.5584689  |
| H  | 0.0002741  | -0.9517505 | 1.8493688  |
| H  | -2.1447489 | -1.8045718 | 0.9516700  |
| H  | -2.1449379 | -3.5099713 | -0.8444099 |
| H  | -0.0001040 | -4.3625495 | -1.7427910 |
| H  | 2.1449189  | -3.5097281 | -0.8450922 |
| H  | 2.1451079  | -1.8043287 | 0.9509877  |
| H  | -0.0003447 | 1.4232420  | -1.3771661 |

17

H-SiH3...benzene Dimer

|    |            |            |            |
|----|------------|------------|------------|
| Si | -0.0000031 | 3.6249760  | -0.2633734 |
| H  | 0.0032990  | 2.9716256  | 1.0752711  |
| H  | -1.2196853 | 4.4723862  | -0.3629493 |
| H  | 1.2162627  | 4.4769085  | -0.3662841 |
| C  | 0.0000561  | -0.5955579 | 1.1244962  |
| C  | -1.2070282 | -1.0747463 | 0.6185523  |
| C  | -1.2070801 | -2.0331615 | -0.3934228 |
| C  | -0.0000476 | -2.5123883 | -0.8994541 |
| C  | 1.2070367  | -2.0331998 | -0.3935102 |
| C  | 1.2070886  | -1.0747846 | 0.6184649  |
| H  | 0.0000964  | 0.1491193  | 1.9107888  |
| H  | -2.1448781 | -0.7023928 | 1.0117326  |
| H  | -2.1449703 | -2.4054852 | -0.7865351 |
| H  | -0.0000879 | -3.2570654 | -1.6857467 |
| H  | 2.1448866  | -2.4055533 | -0.7866905 |
| H  | 2.1449787  | -0.7024609 | 1.0115773  |
| H  | -0.0000104 | 2.6211953  | -1.3570848 |

18

H-CH2OH...benzene Dimer

|   |            |            |            |
|---|------------|------------|------------|
| C | -0.6762112 | 3.2838253  | -0.5035072 |
| H | -1.1767533 | 2.8034674  | 0.3445274  |
| H | -1.3311156 | 4.0774607  | -0.8799269 |
| O | 0.5738150  | 3.8219494  | -0.1011977 |
| H | 0.4282548  | 4.4724326  | 0.5939530  |
| C | 0.2144780  | -2.4760529 | -0.8867296 |

|   |            |            |            |
|---|------------|------------|------------|
| C | 1.3257015  | -1.8269583 | -0.3514616 |
| C | 1.1603125  | -0.8784234 | 0.6562990  |
| C | -0.1163001 | -0.5789833 | 1.1287917  |
| C | -1.2275236 | -1.2280779 | 0.5935237  |
| C | -1.0621346 | -2.1766127 | -0.4142369 |
| H | 0.3429833  | -3.2130531 | -1.6697476 |
| H | 2.3176142  | -2.0596197 | -0.7185828 |
| H | 2.0237199  | -0.3740847 | 1.0721958  |
| H | -0.2448054 | 0.1580170  | 1.9118097  |
| H | -2.2194364 | -0.9954164 | 0.9606449  |
| H | -1.9255420 | -2.6809515 | -0.8301338 |
| H | -0.5204724 | 2.5488933  | -1.2878065 |

### F-X<sup>+</sup>C<sub>6</sub>H<sub>6</sub> Dimers

14

F-H...benzene Dimer

|   |            |            |            |
|---|------------|------------|------------|
| C | -0.7056126 | -0.5160857 | 1.2070613  |
| C | 0.5526843  | -1.1155450 | 1.2070613  |
| C | -1.3347611 | -0.2163560 | 0.0000000  |
| C | 0.5526843  | -1.1155450 | -1.2070613 |
| C | -0.7056126 | -0.5160857 | -1.2070613 |
| C | 1.1818328  | -1.4152747 | 0.0000000  |
| H | -1.1945212 | -0.2831670 | 2.1450636  |
| H | 1.0415930  | -1.3484637 | 2.1450636  |
| H | 2.1596501  | -1.8811121 | 0.0000000  |
| H | 1.0415930  | -1.3484637 | -2.1450636 |
| H | -1.1945212 | -0.2831670 | -2.1450636 |
| H | -2.3125784 | 0.2494813  | 0.0000000  |
| H | -0.5922116 | 3.8606222  | 0.0000000  |
| F | 0.2494562  | 3.4596472  | 0.0000000  |

16

F-BF<sub>2</sub>...benzene Dimer

|   |            |            |            |
|---|------------|------------|------------|
| F | -0.2911978 | 3.2389880  | 1.1345510  |
| F | -0.2911978 | 3.2389880  | -1.1345510 |
| B | 0.2341500  | 2.7769104  | 0.0000000  |
| C | 0.8863728  | -3.0572885 | 0.0000000  |
| C | 0.3630911  | -2.5970281 | -1.2070584 |
| C | -0.6834723 | -1.6765074 | -1.2070584 |
| C | -1.2067540 | -1.2162471 | 0.0000000  |
| C | -0.6834723 | -1.6765074 | 1.2070584  |
| C | 0.3630911  | -2.5970281 | 1.2070584  |
| H | 1.6995401  | -3.7725221 | 0.0000000  |
| H | 0.7696748  | -2.9546450 | -2.1449284 |
| H | -1.0900559 | -1.3188906 | -2.1449284 |
| H | -2.0199213 | -0.5010134 | 0.0000000  |
| H | -1.0900559 | -1.3188906 | 2.1449284  |
| H | 0.7696748  | -2.9546450 | 2.1449284  |
| F | 1.2189983  | 1.9106722  | 0.0000000  |

16

F-CCH...benzene Dimer

|   |            |            |            |
|---|------------|------------|------------|
| C | 0.2592683  | 3.1588229  | 0.0000000  |
| C | -0.6540566 | 3.9490807  | 0.0000000  |
| C | -1.2029887 | -0.7331992 | 0.0000000  |
| C | -0.6759840 | -1.1891919 | 1.2070584  |
| C | 0.3780253  | -2.1011775 | 1.2070584  |
| C | 0.9050300  | -2.5571703 | 0.0000000  |
| C | 0.3780253  | -2.1011775 | -1.2070584 |
| C | -0.6759840 | -1.1891919 | -1.2070584 |
| H | -2.0219414 | -0.0245973 | 0.0000000  |

|   |            |            |            |
|---|------------|------------|------------|
| H | -1.0854604 | -0.8348910 | 2.1449284  |
| H | 0.7875016  | -2.4554785 | 2.1449284  |
| H | 1.7239826  | -3.2657722 | 0.0000000  |
| H | 0.7875016  | -2.4554785 | -2.1449284 |
| H | -1.0854604 | -0.8348910 | -2.1449284 |
| H | -1.4599464 | 4.6463799  | 0.0000000  |
| F | 1.2306625  | 2.3183204  | 0.0000000  |

17

F-CF<sub>3</sub>...benzene Dimer

|   |            |            |            |
|---|------------|------------|------------|
| C | -0.0001032 | 2.4461980  | 0.1488924  |
| F | -1.0964096 | 3.2295984  | 0.1254967  |
| F | 0.0224085  | 1.7788691  | -1.0265325 |
| F | 1.0744101  | 3.2595700  | 0.1500554  |
| C | -0.0001730 | -3.3424800 | 0.9723111  |
| C | -1.2071403 | -2.9046021 | 0.4299587  |
| C | -1.2069583 | -2.0291265 | -0.6545669 |
| C | 0.0001911  | -1.5915288 | -1.1967401 |
| C | 1.2071585  | -2.0294066 | -0.6543878 |
| C | 1.2069765  | -2.9048822 | 0.4301378  |
| H | -0.0003144 | -4.0227141 | 1.8149746  |
| H | -2.1450811 | -3.2446103 | 0.8512209  |
| H | -2.1447576 | -1.6889006 | -1.0759682 |
| H | 0.0003326  | -0.9112946 | -2.0394036 |
| H | 2.1450992  | -1.6893984 | -1.0756499 |
| H | 2.1447757  | -3.2451081 | 0.8515392  |
| F | -0.0003803 | 1.6316682  | 1.1675091  |

17

F-CH<sub>3</sub>...benzene Dimer

|   |            |            |            |
|---|------------|------------|------------|
| C | 0.0001301  | 3.5536519  | -0.2542091 |
| H | -0.8900614 | 4.1830430  | -0.2992877 |
| H | 0.0124096  | 2.9295780  | -1.1519957 |
| H | 0.8785594  | 4.2000986  | -0.2869527 |
| C | -0.0003396 | -2.1641888 | 1.0363323  |
| C | -1.2072195 | -1.7679591 | 0.4626632  |
| C | -1.2068626 | -0.9756549 | -0.6840309 |
| C | 0.0003742  | -0.5795803 | -1.2570557 |
| C | 1.2072541  | -0.9758100 | -0.6833866 |
| C | 1.2068972  | -1.7681142 | 0.4633075  |
| H | -0.0006170 | -2.7797998 | 1.9272999  |
| H | -2.1452282 | -2.0757044 | 0.9078967  |
| H | -2.1445939 | -0.6677892 | -1.1297649 |
| H | 0.0006515  | 0.0360306  | -2.1480233 |
| H | 2.1452628  | -0.6680647 | -1.1286201 |
| H | 2.1446285  | -2.0759799 | 0.9090415  |
| F | -0.0002698 | 2.7734590  | 0.8817892  |



16  
 F-CHO...benzene Dimer  
 C 0.3813085 -3.1286444 0.0095214  
 O -0.6776737 -3.6411525 0.2976008  
 H 1.2845799 -3.3337351 0.6114968  
 C 0.1278469 2.5990761 -0.9440027  
 C -1.1383282 2.0671517 -0.7062837  
 C -1.3396000 1.1991880 0.3655288  
 C -0.2746967 0.8631488 1.1996224  
 C 0.9914784 1.3950733 0.9619034  
 C 1.1927502 2.2630369 -0.1099092  
 H 0.2842328 3.2734735 -1.7767883  
 H -1.9657453 2.3282501 -1.3543644  
 H -2.3234030 0.7858890 0.5502337  
 H -0.4310825 0.1887514 2.0324079  
 H 1.8188955 1.1339748 1.6099841  
 H 2.1765532 2.6763359 -0.2946140  
 F 0.5602434 -2.3036068 -1.0138249

15  
 F-CN...benzene Dimer  
 C -0.2112777 3.1459753 0.0000000  
 N 0.6650529 3.9001769 0.0000000  
 C -0.8993705 -2.5257338 0.0000000  
 C -0.3711607 -2.0711375 1.2070584  
 C 0.6852588 -1.1619449 1.2070584  
 C 1.2134686 -0.7073486 0.0000000  
 C 0.6852588 -1.1619449 -1.2070584  
 C -0.3711607 -2.0711375 -1.2070584  
 H -1.7201959 -3.2321655 0.0000000  
 H -0.7815734 -2.4243534 2.1449284  
 H 1.0956715 -0.8087290 2.1449284  
 H 2.0342940 -0.0009168 0.0000000  
 H 1.0956715 -0.8087290 -2.1449284  
 H -0.7815734 -2.4243534 -2.1449284  
 F -1.1744521 2.3170328 0.0000000

19  
 F-COCH3...benzene Dimer  
 C 0.1270222 -2.7585814 -0.2083701  
 O 1.1649068 -3.1271513 0.3077512  
 C -1.2062688 -3.2702285 0.2887881  
 H -1.7423605 -3.7881996 -0.5097409  
 H -1.8326224 -2.4436323 0.6319451  
 H -1.0247213 -3.9571190 1.1120944  
 C -0.0544707 1.2214666 1.2006494  
 C 1.1827389 1.6831383 0.7547512  
 C 1.2489225 2.5868373 -0.3043055  
 C 0.0778965 3.0288647 -0.9174640

C -1.1593130 2.5671930 -0.4715659  
 C -1.2254966 1.6634939 0.5874909  
 H -0.1058945 0.5193032 2.0235239  
 H 2.0926121 1.3396883 1.2311681  
 H 2.2102196 2.9455507 -0.6507631  
 H 0.1293204 3.7310280 -1.7403385  
 H -2.0691862 2.9106430 -0.9479828  
 H -2.1867937 1.3047806 0.9339484  
 F 0.1446479 -1.8935303 -1.2257501

20  
 F-COOCH3...benzene Dimer  
 C 0.4875956 2.3051170 -0.3853265  
 O 1.3482838 2.6843641 0.3777670  
 O -0.7671059 2.7844906 -0.3642994  
 C -1.0163119 3.7845368 0.6334386  
 H -2.0600141 4.0580304 0.5133811  
 H -0.8323001 3.3749653 1.6248866  
 H -0.3672484 4.6428278 0.4702474  
 C -0.3407219 -1.5442861 1.1325060  
 C -1.3643056 -1.9479804 0.2769589  
 C -1.1201986 -2.9198156 -0.6918555  
 C 0.1474921 -3.4879566 -0.8051228  
 C 1.1710757 -3.0842623 0.0504242  
 C 0.9269688 -2.1124271 1.0192386  
 H -0.5303902 -0.7891817 1.8852632  
 H -2.3492862 -1.5065416 0.3649663  
 H -1.9155110 -3.2334813 -1.3566053  
 H 0.3371603 -4.2430610 -1.5578801  
 H 2.1560563 -3.5257011 -0.0375832  
 H 1.7222811 -1.7987614 1.6839884  
 F 0.6696166 1.3931799 -1.3133754

17  
 F-COOH...benzene Dimer  
 C 0.0955944 -2.7353152 0.1997016  
 O 1.1071718 -3.1542881 -0.3150363  
 O -1.1292082 -3.1184055 -0.2206456  
 H -0.9892259 -3.7401163 -0.9526105  
 C 0.0095038 2.9997367 0.9141884  
 C 1.2123349 2.5567448 0.3668229  
 C 1.2041998 1.6520171 -0.6933916  
 C -0.0067664 1.1902813 -1.2062408  
 C -1.2095975 1.6332731 -0.6588754  
 C -1.2014624 2.5380008 0.4013392  
 H 0.0158246 3.7026993 1.7379625  
 H 2.1532412 2.9155080 0.7653006  
 H 2.1387852 1.3078177 -1.1186881  
 H -0.0130873 0.4873186 -2.0300149

|   |            |            |            |
|---|------------|------------|------------|
| H | -2.1505038 | 1.2745099  | -1.0573531 |
| H | -2.1360479 | 2.8822002  | 0.8266356  |
| F | 0.0576175  | -1.8869394 | 1.1949468  |

14

F-F...benzene Dimer

|   |            |            |            |
|---|------------|------------|------------|
| F | 0.2362256  | -3.4486249 | 0.0000000  |
| C | 1.2932635  | 0.5811058  | 0.0000000  |
| C | 0.7103368  | 0.9630218  | 1.2070584  |
| C | -0.4555165 | 1.7268538  | 1.2070584  |
| C | -1.0384432 | 2.1087698  | 0.0000000  |
| C | -0.4555165 | 1.7268538  | -1.2070584 |
| C | 0.7103368  | 0.9630218  | -1.2070584 |
| H | 2.1991177  | -0.0123826 | 0.0000000  |
| H | 1.1632639  | 0.6662776  | 2.1449284  |
| H | -0.9084436 | 2.0235980  | 2.1449284  |
| H | -1.9442974 | 2.7022581  | 0.0000000  |
| H | -0.9084436 | 2.0235980  | -2.1449284 |
| H | 1.1632639  | 0.6662776  | -2.1449284 |
| F | -0.9136553 | -2.6952576 | 0.0000000  |

22

F-NCH3\_2...benzene Dimer

|   |            |            |            |
|---|------------|------------|------------|
| N | 0.1233569  | -2.5658345 | 0.0000000  |
| C | -0.2097281 | -3.2492724 | 1.2349280  |
| H | -1.0714584 | -3.8899942 | 1.0591355  |
| H | -0.4870660 | -2.5319765 | 2.0086125  |
| H | 0.6177174  | -3.8663311 | 1.6108450  |
| C | -0.2097281 | -3.2492724 | -1.2349280 |
| H | -0.4870660 | -2.5319765 | -2.0086125 |
| H | -1.0714584 | -3.8899942 | -1.0591355 |
| H | 0.6177174  | -3.8663311 | -1.6108450 |
| C | -1.2218372 | 1.3725839  | 0.0000000  |
| C | -0.6786215 | 1.8091386  | -1.2070584 |
| C | 0.4078098  | 2.6822482  | -1.2070584 |
| C | 0.9510255  | 3.1188030  | 0.0000000  |
| C | 0.4078098  | 2.6822482  | 1.2070584  |
| C | -0.6786215 | 1.8091386  | 1.2070584  |
| H | -2.0659814 | 0.6941881  | 0.0000000  |
| H | -1.1006936 | 1.4699408  | -2.1449284 |
| H | 0.8298819  | 3.0214460  | -2.1449284 |
| H | 1.7951697  | 3.7971987  | 0.0000000  |
| H | 0.8298819  | 3.0214460  | 2.1449284  |
| H | -1.1006936 | 1.4699408  | 2.1449284  |
| F | 1.2150817  | -1.7286376 | 0.0000000  |

16

F-NH2...benzene Dimer

|   |            |            |            |
|---|------------|------------|------------|
| H | -0.3283431 | 3.9275535  | 0.8344900  |
| H | -0.3283431 | 3.9275535  | -0.8344900 |
| N | -0.1800233 | 3.3811761  | 0.0000000  |
| C | -1.2551679 | -0.5224128 | 0.0000000  |
| C | -0.6897383 | -0.9297857 | 1.2070584  |
| C | 0.4411208  | -1.7445316 | 1.2070584  |
| C | 1.0065504  | -2.1519045 | 0.0000000  |
| C | 0.4411208  | -1.7445316 | -1.2070584 |
| C | -0.6897383 | -0.9297857 | -1.2070584 |
| H | -2.1338321 | 0.1106351  | 0.0000000  |
| H | -1.1290704 | -0.6132618 | 2.1449284  |
| H | 0.8804529  | -2.0610555 | 2.1449284  |
| H | 1.8852146  | -2.7849524 | 0.0000000  |
| H | 0.8804529  | -2.0610555 | -2.1449284 |
| H | -1.1290704 | -0.6132618 | -2.1449284 |
| F | 0.9636220  | 2.6241369  | 0.0000000  |

19

F-NHCH3...benzene Dimer

|   |            |            |            |
|---|------------|------------|------------|
| N | 0.4712576  | 2.8939993  | 0.0304859  |
| H | 1.3367631  | 3.3205147  | 0.3181485  |
| C | -0.7060230 | 3.7170249  | 0.2132594  |
| H | -0.5471017 | 4.3619227  | 1.0758681  |
| H | -1.5754558 | 3.0911433  | 0.4223808  |
| H | -0.9282243 | 4.3413916  | -0.6612570 |
| C | -0.2012624 | -0.9845682 | 1.2135356  |
| C | -1.3048411 | -1.2972044 | 0.4216858  |
| C | -1.1614773 | -2.1584995 | -0.6647169 |
| C | 0.0854650  | -2.7071584 | -0.9592699 |
| C | 1.1890437  | -2.3945222 | -0.1674200 |
| C | 1.0456800  | -1.5332271 | 0.9189827  |
| H | -0.3126543 | -0.3153522 | 2.0576576  |
| H | -2.2737004 | -0.8709029 | 0.6505499  |
| H | -2.0189448 | -2.4014141 | -1.2799748 |
| H | 0.1968570  | -3.3763744 | -1.8033919 |
| H | 2.1579031  | -2.8208237 | -0.3962842 |
| H | 1.9031474  | -1.2903126 | 1.5342406  |
| F | 0.5878763  | 2.0770184  | -1.0676197 |

17

F-NHOH...benzene Dimer

|   |            |            |            |
|---|------------|------------|------------|
| N | 0.4733379  | 2.9156796  | 0.1009272  |
| H | 1.2546159  | 3.5586310  | 0.1545107  |
| O | -0.6852618 | 3.7149413  | 0.1297536  |
| H | -1.1420271 | 3.4308846  | 0.9314219  |
| C | 0.0553073  | -2.6852091 | -0.9811970 |
| C | 1.1751707  | -2.3827620 | -0.2084842 |
| C | 1.0532613  | -1.5411428 | 0.8958113  |
| C | -0.1885114 | -1.0019706 | 1.2273940  |

|   |            |            |            |
|---|------------|------------|------------|
| C | -1.3083748 | -1.3044176 | 0.4546812  |
| C | -1.1864655 | -2.1460368 | -0.6496143 |
| H | 0.1500294  | -3.3391372 | -1.8392214 |
| H | 2.1400133  | -2.8016924 | -0.4661199 |
| H | 1.9233818  | -1.3061450 | 1.4962000  |
| H | -0.2832336 | -0.3480424 | 2.0854184  |
| H | -2.2732175 | -0.8854872 | 0.7123169  |
| H | -2.0565860 | -2.3810346 | -1.2500030 |
| F | 0.5503569  | 2.1477379  | -1.0353991 |

15

F-NO...benzene Dimer

|   |            |            |            |
|---|------------|------------|------------|
| N | 0.4406428  | 3.0396210  | 0.0698682  |
| O | -0.6556122 | 3.4850724  | 0.3011429  |
| C | -0.2232187 | -0.7957774 | 1.2159624  |
| C | -1.3160201 | -1.1368996 | 0.4209314  |
| C | -1.1494869 | -2.0035797 | -0.6578575 |
| C | 0.1098477  | -2.5291377 | -0.9416155 |
| C | 1.2026491  | -2.1880155 | -0.1465846 |
| C | 1.0361159  | -1.3213354 | 0.9322044  |
| H | -0.3526130 | -0.1223773 | 2.0541686  |
| H | -2.2945080 | -0.7285473 | 0.6414081  |
| H | -1.9985805 | -2.2686275 | -1.2755871 |
| H | 0.2392420  | -3.2025378 | -1.7798217 |
| H | 2.1811370  | -2.5963678 | -0.3670612 |
| H | 1.8852095  | -1.0562875 | 1.5499339  |
| F | 0.5039826  | 2.1758499  | -1.0381207 |

16

F-NO2...benzene Dimer

|   |            |            |            |
|---|------------|------------|------------|
| O | 0.3026219  | 3.0845853  | 1.0779960  |
| O | 0.3026219  | 3.0845853  | -1.0779960 |
| N | -0.1309693 | 2.7244354  | 0.0000000  |
| C | 1.2200192  | -1.1583032 | 0.0000000  |
| C | 0.6839348  | -1.6035860 | -1.2070584 |
| C | -0.3882340 | -2.4941518 | -1.2070584 |
| C | -0.9243184 | -2.9394347 | 0.0000000  |
| C | -0.3882340 | -2.4941518 | 1.2070584  |
| C | 0.6839348  | -1.6035860 | 1.2070584  |
| H | 2.0530816  | -0.4663442 | 0.0000000  |
| H | 1.1004660  | -1.2576065 | -2.1449284 |
| H | -0.8047652 | -2.8401313 | -2.1449284 |
| H | -1.7573808 | -3.6313937 | 0.0000000  |
| H | -0.8047652 | -2.8401313 | 2.1449284  |
| H | 1.1004660  | -1.2576065 | 2.1449284  |
| F | -1.1839281 | 1.8498259  | 0.0000000  |

18

F-OCF3...benzene Dimer

|   |            |            |            |
|---|------------|------------|------------|
| C | 0.0794759  | -2.5687440 | 0.0841730  |
| O | -1.0164767 | -1.8331213 | -0.1624841 |
| F | 1.1562271  | -1.8160012 | 0.3745959  |
| F | 0.4200061  | -3.3574466 | -0.9513693 |
| F | -0.1759319 | -3.3477420 | 1.1315757  |
| C | 0.2656334  | 1.8197171  | 1.1580080  |
| C | 1.3143559  | 2.0769256  | 0.2767145  |
| C | 1.1580945  | 3.0222683  | -0.7354925 |
| C | -0.0468895 | 3.7104025  | -0.8664059 |
| C | -1.0956120 | 3.4531939  | 0.0148876  |
| C | -0.9393505 | 2.5078512  | 1.0270945  |
| H | 0.3870467  | 1.0851971  | 1.9444807  |
| H | 2.2506141  | 1.5422536  | 0.3784326  |
| H | 1.9729394  | 3.2221163  | -1.4202470 |
| H | -0.1683028 | 4.4449225  | -1.6528786 |
| H | -2.0318702 | 3.9878660  | -0.0868306 |
| H | -1.7541954 | 2.3080033  | 1.7118491  |
| F | -1.0463297 | -0.9262934 | -1.2001036 |

15

F-OH...benzene Dimer

|   |            |            |            |
|---|------------|------------|------------|
| O | 0.0540242  | 3.4378458  | -0.1974040 |
| H | -0.8455348 | 3.6441330  | -0.4789366 |
| C | -0.0255809 | -0.5503349 | -1.2731516 |
| C | 1.1960659  | -0.9417271 | -0.7281337 |
| C | 1.2259921  | -1.7285942 | 0.4219089  |
| C | 0.0342715  | -2.1240691 | 1.0269335  |
| C | -1.1873753 | -1.7326770 | 0.4819156  |
| C | -1.2173015 | -0.9458099 | -0.6681270 |
| H | -0.0488333 | 0.0610514  | -2.1667210 |
| H | 2.1220187  | -0.6344477 | -1.1982307 |
| H | 2.1751972  | -2.0327012 | 0.8453813  |
| H | 0.0575239  | -2.7354555 | 1.9205029  |
| H | -2.1133280 | -2.0399564 | 0.9520126  |
| H | -2.1665066 | -0.6417029 | -1.0915994 |
| F | 0.0228023  | 2.6533102  | 0.9505981  |

18

F-OMe...benzene Dimer

|   |            |            |            |
|---|------------|------------|------------|
| O | 0.5176469  | -2.9648369 | -0.0338026 |
| C | -0.7607398 | -3.5281843 | -0.2667652 |
| H | -1.5060730 | -2.7480332 | -0.4409796 |
| H | -1.0710521 | -4.1546590 | 0.5733203  |
| H | -0.6583596 | -4.1398229 | -1.1588920 |
| C | -0.2986569 | 0.9651556  | -1.1963091 |
| C | -1.3243376 | 1.2875277  | -0.3093431 |
| C | -1.0744724 | 2.1395307  | 0.7650459  |
| C | 0.2010734  | 2.6691615  | 0.9524689  |

|   |            |            |            |
|---|------------|------------|------------|
| C | 1.2267541  | 2.3467893  | 0.0655029  |
| C | 0.9768890  | 1.4947864  | -1.0088861 |
| H | -0.4927991 | 0.3031594  | -2.0310966 |
| H | -2.3154215 | 0.8760109  | -0.4549686 |
| H | -1.8714141 | 2.3900100  | 1.4542079  |
| H | 0.3952157  | 3.3311576  | 1.7872563  |
| H | 2.2178381  | 2.7583061  | 0.2111283  |
| H | 1.7738306  | 1.2443070  | -1.6980481 |
| F | 0.6649101  | -2.1202884 | 1.0742534  |

18

F-SCH3...benzene Dimer

|   |            |            |            |
|---|------------|------------|------------|
| S | 0.5318102  | -2.7882770 | -0.1280299 |
| C | -1.2080445 | -3.2813540 | -0.1561987 |
| H | -1.8600351 | -2.4303703 | -0.3514504 |
| H | -1.4966861 | -3.7765691 | 0.7705355  |
| H | -1.3001054 | -3.9907699 | -0.9775679 |
| C | -0.1886946 | 1.2567042  | -1.1826857 |
| C | -1.2912574 | 1.6070072  | -0.4053207 |
| C | -1.1459729 | 2.5174316  | 0.6399894  |
| C | 0.1018744  | 3.0775530  | 0.9079345  |
| C | 1.2044372  | 2.7272499  | 0.1305694  |
| C | 1.0591527  | 1.8168255  | -0.9147407 |
| H | -0.3015789 | 0.5493153  | -1.9948792 |
| H | -2.2608199 | 1.1717996  | -0.6135108 |
| H | -2.0026510 | 2.7896129  | 1.2439928  |
| H | 0.2147588  | 3.7849419  | 1.7201279  |
| H | 2.1739997  | 3.1624576  | 0.3387595  |
| H | 1.9158309  | 1.5446443  | -1.5187441 |
| F | 0.5863317  | -1.7287501 | 1.1255718  |

15

F-SH...benzene Dimer

|   |            |            |            |
|---|------------|------------|------------|
| S | 0.0526480  | 3.2022812  | -0.2008085 |
| H | -1.2757505 | 3.3238498  | -0.3379307 |
| C | -0.0190789 | -0.9134936 | -1.2234255 |
| C | 1.2013050  | -1.3413903 | -0.7035979 |
| C | 1.2284695  | -2.2139600 | 0.3829276  |
| C | 0.0352500  | -2.6586329 | 0.9496255  |
| C | -1.1851340 | -2.2307363 | 0.4297979  |
| C | -1.2122984 | -1.3581666 | -0.6567276 |
| H | -0.0401854 | -0.2355174 | -2.0676428 |
| H | 2.1284224  | -0.9958847 | -1.1439154 |
| H | 2.1766933  | -2.5464306 | 0.7868275  |
| H | 0.0563565  | -3.3366092 | 1.7938429  |
| H | -2.1122513 | -2.5762419 | 0.8701154  |
| H | -2.1605223 | -1.0256960 | -1.0606274 |
| F | 0.0099619  | 2.1771227  | 1.0765237  |

17

F-SiF3...benzene Dimer

|    |            |            |            |
|----|------------|------------|------------|
| Si | -0.0001153 | 2.3083961  | -0.1266175 |
| F  | 0.0142745  | 1.6400134  | 1.3247236  |
| F  | -1.3043703 | 3.2290784  | -0.1798528 |
| F  | 1.2903485  | 3.2472254  | -0.1964853 |
| C  | 0.0005463  | -1.8379746 | 1.1503929  |
| C  | -1.2067180 | -2.3061967 | 0.6347047  |
| C  | -1.2071299 | -3.2425099 | -0.3977539 |
| C  | -0.0002776 | -3.7106010 | -0.9145243 |
| C  | 1.2069866  | -3.2423788 | -0.3988361 |
| C  | 1.2073986  | -2.3060656 | 0.6336225  |
| H  | 0.0008664  | -1.1104704 | 1.9526009  |
| H  | -2.1444278 | -1.9424956 | 1.0362291  |
| H  | -2.1451599 | -3.6063130 | -0.7984375 |
| H  | -0.0005977 | -4.4381052 | -1.7167323 |
| H  | 2.1446965  | -3.6060800 | -0.8003605 |
| H  | 2.1454286  | -1.9422626 | 1.0343061  |
| F  | -0.0007003 | 1.2642546  | -1.3014385 |

17

F-SiH3...benzene Dimer

|    |            |            |            |
|----|------------|------------|------------|
| Si | 0.0000062  | 3.3257519  | 0.1986900  |
| H  | 0.0033433  | 2.5594349  | 1.4760286  |
| H  | -1.2196760 | 4.1785924  | 0.1725704  |
| H  | 1.2162719  | 4.1833835  | 0.1695701  |
| C  | 0.0000905  | -0.9987127 | 1.2175592  |
| C  | -1.2070093 | -1.4325012 | 0.6722236  |
| C  | -1.2070922 | -2.3001106 | -0.4186051 |
| C  | -0.0000752 | -2.7339315 | -0.9640982 |
| C  | 1.2070247  | -2.3001430 | -0.4187626 |
| C  | 1.2071075  | -1.4325337 | 0.6720661  |
| H  | 0.0001549  | -0.3245906 | 2.0651201  |
| H  | -2.1448471 | -1.0954275 | 1.0960653  |
| H  | -2.1449944 | -2.6371590 | -0.8423244 |
| H  | -0.0001396 | -3.4080536 | -1.8116592 |
| H  | 2.1448625  | -2.6372167 | -0.8426043 |
| H  | 2.1450097  | -1.0954852 | 1.0957854  |
| F  | -0.0000381 | 2.3393674  | -1.0821763 |

18

F-CH2OH...benzene Dimer

|   |            |            |            |
|---|------------|------------|------------|
| C | -0.5075821 | 3.0468490  | 0.1669130  |
| H | -0.6487996 | 2.5093663  | 1.1111686  |
| H | -1.2078298 | 3.8892909  | 0.1470794  |
| O | 0.8290227  | 3.5106664  | 0.0557516  |
| H | 1.0199834  | 4.1020644  | 0.7915050  |
| C | -0.2128124 | -2.6814581 | -0.9358072 |

|   |            |            |            |
|---|------------|------------|------------|
| C | 1.0583511  | -2.1146353 | -0.8615881 |
| C | 1.3771172  | -1.2531281 | 0.1866709  |
| C | 0.4247197  | -0.9584437 | 1.1607107  |
| C | -0.8464438 | -1.5252666 | 1.0864916  |
| C | -1.1652099 | -2.3867738 | 0.0382326  |
| H | -0.4604899 | -3.3508390 | -1.7502919 |
| H | 1.7983526  | -2.3436015 | -1.6184054 |
| H | 2.3647961  | -0.8127135 | 0.2443383  |
| H | 0.6723972  | -0.2890629 | 1.9751955  |
| H | -1.5864453 | -1.2963003 | 1.8433089  |
| H | -2.1528888 | -2.8271884 | -0.0194348 |
| F | -0.7863191 | 2.2128067  | -0.8652457 |

### H-X...C<sub>6</sub>F<sub>6</sub> Dimers

14

H-H...perfluorobenzene Dimer

|   |            |            |            |
|---|------------|------------|------------|
| H | 3.4424315  | 2.4552290  | 0.0000000  |
| C | -0.0734559 | -0.7535963 | -1.2020128 |
| C | -0.0660348 | -1.4475391 | 0.0000000  |
| C | -0.0734559 | -0.7535963 | 1.2020128  |
| C | -0.0882982 | 0.6342892  | 1.2020128  |
| C | -0.0957193 | 1.3282320  | 0.0000000  |
| C | -0.0882982 | 0.6342892  | -1.2020128 |
| F | -0.0663382 | -1.4191734 | -2.3548921 |
| F | -0.0517993 | -2.7786933 | 0.0000000  |
| F | -0.0663382 | -1.4191734 | 2.3548921  |
| F | -0.0954159 | 1.2998663  | 2.3548921  |
| F | -0.1099548 | 2.6593862  | 0.0000000  |
| F | -0.0954159 | 1.2998663  | -2.3548921 |
| H | 3.4503482  | 1.7149407  | 0.0000000  |

16

H-BF<sub>2</sub>...perfluorobenzene Dimer

|   |            |            |            |
|---|------------|------------|------------|
| F | 0.8247427  | 3.9685111  | 1.1345510  |
| F | 0.8247427  | 3.9685111  | -1.1345510 |
| B | 1.1955450  | 3.3752054  | 0.0000000  |
| C | 0.4837020  | -2.1841095 | 0.0000000  |
| C | 0.1159016  | -1.5956069 | 1.2020130  |
| C | -0.6196981 | -0.4186035 | 1.2020130  |
| C | -0.9874985 | 0.1698991  | 0.0000000  |
| C | -0.6196981 | -0.4186035 | -1.2020130 |
| C | 0.1159016  | -1.5956069 | -1.2020130 |
| F | 1.1892336  | -3.3130021 | 0.0000000  |
| F | 0.4686679  | -2.1600541 | 2.3548920  |
| F | -0.9724645 | 0.1458437  | 2.3548920  |
| F | -1.6930301 | 1.2987917  | 0.0000000  |
| F | -0.9724645 | 0.1458437  | -2.3548920 |
| F | 0.4686679  | -2.1600541 | -2.3548920 |
| H | 1.8250374  | 2.3679800  | 0.0000000  |

16

H-CCH...perfluorobenzene Dimer

|   |            |            |            |
|---|------------|------------|------------|
| C | -1.8081330 | 3.4377550  | 0.0000000  |
| C | -1.3063211 | 4.5363243  | 0.0000000  |
| C | 0.8198564  | 0.6468724  | 0.0000000  |
| H | -0.8635377 | 5.5056680  | 0.0000000  |
| C | 0.5315121  | 0.0156276  | 1.2020130  |
| C | -0.0451756 | -1.2468602 | 1.2020130  |
| C | -0.3335199 | -1.8781050 | 0.0000000  |
| C | -0.0451756 | -1.2468602 | -1.2020130 |
| C | 0.5315121  | 0.0156276  | -1.2020130 |

|   |            |            |            |
|---|------------|------------|------------|
| F | 1.3729716  | 1.8577551  | 0.0000000  |
| F | 0.8080701  | 0.6210699  | 2.3548920  |
| F | -0.3217336 | -1.8523024 | 2.3548920  |
| F | -0.8866351 | -3.0889877 | 0.0000000  |
| F | -0.3217336 | -1.8523024 | -2.3548920 |
| F | 0.8080701  | 0.6210699  | -2.3548920 |
| H | -2.2510503 | 2.4681182  | 0.0000000  |

17

H-CF<sub>3</sub>...perfluorobenzene Dimer

|   |            |            |            |
|---|------------|------------|------------|
| C | 0.0001530  | -3.1139060 | 0.8726640  |
| F | 1.0964729  | -3.1726997 | 0.0911416  |
| F | -0.0224472 | -4.2580175 | 1.5923558  |
| F | -1.0743447 | -3.1493810 | 0.0600444  |
| C | 0.0002507  | 2.4079935  | 0.5723497  |
| C | -1.2018792 | 1.8490474  | 0.1613625  |
| C | -1.2021132 | 0.7308138  | -0.6608282 |
| C | -0.0002172 | 0.1715246  | -1.0720329 |
| C | 1.2019128  | 0.7304707  | -0.6610457 |
| C | 1.2021467  | 1.8487044  | 0.1611450  |
| F | 0.0004751  | 3.4805186  | 1.3609327  |
| F | -2.3546460 | 2.3854753  | 0.5557590  |
| F | -2.3551044 | 0.1947149  | -1.0550160 |
| F | -0.0004416 | -0.9010004 | -1.8606159 |
| F | 2.3546796  | 0.1940429  | -1.0554422 |
| F | 2.3551379  | 2.3848032  | 0.5553328  |
| H | 0.0004245  | -2.2383122 | 1.5102426  |

17

H-CH<sub>3</sub>...perfluorobenzene Dimer

|   |            |            |            |
|---|------------|------------|------------|
| C | 0.0000120  | 3.4857370  | -2.2529318 |
| H | 0.8902248  | 4.0124641  | -2.6003307 |
| H | -0.0120979 | 3.5369180  | -1.1607442 |
| H | -0.8783982 | 4.0187355  | -2.6202349 |
| C | 0.0001098  | -1.7084273 | -0.1761049 |
| C | -1.2019578 | -1.0480176 | 0.0368276  |
| C | -1.2020669 | 0.2729800  | 0.4627493  |
| C | -0.0001085 | 0.9335699  | 0.6757391  |
| C | 1.2019591  | 0.2731602  | 0.4628066  |
| C | 1.2020682  | -1.0478374 | 0.0368849  |
| F | 0.0002145  | -2.9754282 | -0.5846168 |
| F | -2.3547844 | -1.6816054 | -0.1674561 |
| F | -2.3549983 | 0.9063950  | 0.6669780  |
| F | -0.0002132 | 2.2005708  | 1.0842510  |
| F | 2.3547857  | 0.9067480  | 0.6670903  |
| F | 2.3549996  | -1.6812524 | -0.1673439 |
| H | 0.0001344  | 2.4506997  | -2.5898763 |

16

H-CHO...perfluorobenzene Dimer

|   |            |            |            |
|---|------------|------------|------------|
| C | -0.4858392 | 3.4509762  | -1.6331037 |
| O | 0.3878033  | 4.2055337  | -1.2663759 |
| H | -1.5491294 | 3.7123831  | -1.4867612 |
| C | 0.2329715  | -1.8953156 | -0.3559725 |
| C | -1.0618321 | -1.4561632 | -0.1170655 |
| C | -1.2765466 | -0.2320585 | 0.5009227  |
| C | -0.1964580 | 0.5528955  | 0.8800048  |
| C | 1.0983456  | 0.1137431  | 0.6410978  |
| C | 1.3130602  | -1.1103616 | 0.0231095  |
| F | 0.4389094  | -3.0693842 | -0.9487001 |
| F | -2.0977705 | -2.2090316 | -0.4806524 |
| F | -2.5184233 | 0.1891434  | 0.7300643  |
| F | -0.4023959 | 1.7269641  | 1.4727323  |
| F | 2.1342840  | 0.8666115  | 1.0046846  |
| F | 2.5549369  | -1.5315635 | -0.2060320 |
| H | -0.3047860 | 2.4814767  | -2.1227101 |

15

H-CN...perfluorobenzene Dimer

|   |            |            |            |
|---|------------|------------|------------|
| C | -1.7643595 | -3.4656852 | 0.0000000  |
| N | -1.2718627 | -4.5117360 | 0.0000000  |
| C | -0.3481736 | 1.8603847  | 0.0000000  |
| C | -0.0525610 | 1.2325108  | 1.2020130  |
| C | 0.5386635  | -0.0232351 | 1.2020130  |
| C | 0.8342761  | -0.6511089 | 0.0000000  |
| C | 0.5386635  | -0.0232351 | -1.2020130 |
| C | -0.0525610 | 1.2325108  | -1.2020130 |
| F | -0.9152313 | 3.0648011  | 0.0000000  |
| F | -0.3360902 | 1.8347199  | 2.3548920  |
| F | 0.8221928  | -0.6254442 | 2.3548920  |
| F | 1.4013338  | -1.8555253 | 0.0000000  |
| F | 0.8221928  | -0.6254442 | -2.3548920 |
| F | -0.3360902 | 1.8347199  | -2.3548920 |
| H | -2.2197365 | -2.4984756 | 0.0000000  |

19

H-COCH3...perfluorobenzene Dimer

|   |            |            |            |
|---|------------|------------|------------|
| C | -0.1256026 | 3.2890906  | -1.2660167 |
| O | -1.1995025 | 3.7755289  | -0.9667740 |
| C | 1.1662099  | 3.9722304  | -0.8772308 |
| H | 1.7544172  | 4.2179151  | -1.7643543 |
| H | 1.7715063  | 3.3200546  | -0.2434960 |
| H | 0.9229236  | 4.8837594  | -0.3363629 |
| C | -0.0254490 | 0.2128269  | 0.9813498  |
| C | 1.1834695  | -0.3683306 | 0.6246711  |
| C | 1.1975162  | -1.5634203 | -0.0810251 |
| C | 0.0026444  | -2.1773544 | -0.4300437 |

|   |            |            |            |
|---|------------|------------|------------|
| C | -1.2062741 | -1.5961969 | -0.0733650 |
| C | -1.2203208 | -0.4011072 | 0.6323312  |
| F | -0.0389215 | 1.3590666  | 1.6582001  |
| F | 2.3294993  | 0.2205085  | 0.9594233  |
| F | 2.3570185  | -2.1208227 | -0.4231243 |
| F | 0.0161169  | -3.3235941 | -1.1068940 |
| F | -2.3523039 | -2.1850360 | -0.4081172 |
| F | -2.3798231 | 0.1562951  | 0.9744304  |
| H | -0.0765679 | 2.3404022  | -1.8266395 |

20

H-COOCH3...perfluorobenzene Dimer

|   |            |            |            |
|---|------------|------------|------------|
| C | 0.3949321  | 2.9753719  | -1.2123175 |
| O | 1.4672161  | 3.4294235  | -0.8791985 |
| O | -0.7728359 | 3.5610136  | -0.8994942 |
| C | -0.6581809 | 4.7709088  | -0.1374673 |
| H | -1.6775515 | 5.1066704  | 0.0258562  |
| H | -0.1580767 | 4.5692308  | 0.8079427  |
| H | -0.0891305 | 5.5107404  | -0.6972968 |
| C | 0.0832710  | -0.1575066 | 1.0042326  |
| C | 1.2262295  | -0.8476007 | 0.6249391  |
| C | 1.1173458  | -2.0184593 | -0.1124065 |
| C | -0.1344967 | -2.4992255 | -0.4704596 |
| C | -1.2774552 | -1.8091313 | -0.0911662 |
| C | -1.1685714 | -0.6382727 | 0.6461794  |
| F | 0.1877041  | 0.9654924  | 1.7114387  |
| F | 2.4269012  | -0.3864861 | 0.9683567  |
| F | 2.2135842  | -2.6803454 | -0.4761960 |
| F | -0.2389297 | -3.6222244 | -1.1776657 |
| F | -2.4781268 | -2.2702459 | -0.4345837 |
| F | -2.2648098 | 0.0236133  | 1.0099690  |
| H | 0.2675025  | 2.0582565  | -1.7917992 |

17

H-COOH...perfluorobenzene Dimer

|   |            |            |            |
|---|------------|------------|------------|
| C | 0.0988677  | 3.3234819  | -1.2437631 |
| O | 1.1232257  | 3.8707225  | -0.9046458 |
| O | -1.1148323 | 3.8284581  | -0.9346953 |
| H | -0.9562543 | 4.6434192  | -0.4321185 |
| C | -0.0159626 | -2.1645340 | -0.4563314 |
| C | -1.2084693 | -1.5589994 | -0.0852475 |
| C | -1.1896798 | -0.3775559 | 0.6429573  |
| C | 0.0216164  | 0.1983548  | 1.0000793  |
| C | 1.2141231  | -0.4071798 | 0.6289954  |
| C | 1.1953336  | -1.5886233 | -0.0992094 |
| F | -0.0339840 | -3.2976851 | -1.1547703 |
| F | -2.3702521 | -2.1113693 | -0.4277719 |
| F | -2.3334411 | 0.2032271  | 0.9988729  |
| F | 0.0396378  | 1.3315059  | 1.6985182  |

|   |           |            |            |
|---|-----------|------------|------------|
| F | 2.3759058 | 0.1451901  | 0.9715198  |
| F | 2.3390949 | -2.1694063 | -0.4551250 |
| H | 0.0460717 | 2.3958244  | -1.8156101 |

14

H-F...perfluorobenzene Dimer

|   |            |            |            |
|---|------------|------------|------------|
| F | -2.1194738 | 3.4293376  | 0.0000000  |
| C | 0.7308742  | 0.9299299  | 0.0000000  |
| C | 0.4854802  | 0.2807811  | 1.2020130  |
| C | -0.0053071 | -1.0175147 | 1.2020130  |
| C | -0.2507010 | -1.6666635 | 0.0000000  |
| C | -0.0053071 | -1.0175147 | -1.2020130 |
| C | 0.4854802  | 0.2807811  | -1.2020130 |
| F | 1.2016001  | 2.1751569  | 0.0000000  |
| F | 0.7208435  | 0.9033955  | 2.3548920  |
| F | -0.2406704 | -1.6401291 | 2.3548920  |
| F | -0.7214270 | -2.9118905 | 0.0000000  |
| F | -0.2406704 | -1.6401291 | -2.3548920 |
| F | 0.7208435  | 0.9033955  | -2.3548920 |
| H | -2.4491593 | 2.5572098  | 0.0000000  |

22

H-NCH3\_2...perfluorobenzene Dimer

|   |            |            |            |
|---|------------|------------|------------|
| N | 1.0766193  | -3.1734437 | 0.0000000  |
| C | 0.9735290  | -3.9267069 | 1.2349280  |
| H | 0.3548771  | -4.8044161 | 1.0591355  |
| H | 0.4861322  | -3.3318338 | 2.0086125  |
| H | 1.9522514  | -4.2546247 | 1.6108450  |
| C | 0.9735290  | -3.9267069 | -1.2349280 |
| H | 0.4861322  | -3.3318338 | -2.0086125 |
| H | 0.3548771  | -4.8044161 | -1.0591355 |
| H | 1.9522514  | -4.2546247 | -1.6108450 |
| C | -1.0503291 | -0.0921266 | 0.0000000  |
| C | -0.6721267 | 0.4897458  | 1.2020130  |
| C | 0.0842768  | 1.6534887  | 1.2020130  |
| C | 0.4624792  | 2.2353611  | 0.0000000  |
| C | 0.0842768  | 1.6534887  | -1.2020130 |
| C | -0.6721267 | 0.4897458  | -1.2020130 |
| F | -1.7758141 | -1.2083007 | 0.0000000  |
| F | -1.0348698 | -0.0683422 | 2.3548920  |
| F | 0.4470199  | 2.2115767  | 2.3548920  |
| F | 1.1879642  | 3.3515352  | 0.0000000  |
| F | 0.4470199  | 2.2115767  | -2.3548920 |
| F | -1.0348698 | -0.0683422 | -2.3548920 |
| H | 1.6431275  | -2.3438097 | 0.0000000  |

16

H-NH2...perfluorobenzene Dimer

|   |            |            |            |
|---|------------|------------|------------|
| H | 2.3912246  | 3.9095934  | 0.8344900  |
| H | 2.3912246  | 3.9095934  | -0.8344900 |
| N | 2.1902542  | 3.3803129  | 0.0000000  |
| C | -0.6863909 | 0.9414796  | 0.0000000  |
| C | -0.4690725 | 0.2824006  | -1.2020130 |
| C | -0.0344363 | -1.0357554 | -1.2020130 |
| C | 0.1828821  | -1.6948344 | 0.0000000  |
| C | -0.0344363 | -1.0357554 | 1.2020130  |
| C | -0.4690725 | 0.2824006  | 1.2020130  |
| F | -1.1032611 | 2.2057552  | 0.0000000  |
| F | -0.6775079 | 0.9145394  | -2.3548920 |
| F | 0.1739991  | -1.6678941 | -2.3548920 |
| F | 0.5997522  | -2.9591099 | 0.0000000  |
| F | 0.1739991  | -1.6678941 | 2.3548920  |
| F | -0.6775079 | 0.9145394  | 2.3548920  |
| H | 2.5425547  | 2.4389319  | 0.0000000  |

19

H-NHCH3...perfluorobenzene Dimer

|   |            |            |            |
|---|------------|------------|------------|
| N | 0.5817072  | 3.2816689  | -1.4858673 |
| H | 1.5053276  | 3.6409045  | -1.6637437 |
| C | -0.4413835 | 4.2898924  | -1.3027339 |
| H | 0.0169277  | 5.1713287  | -0.8574659 |
| H | -1.2071795 | 3.9297960  | -0.6133429 |
| H | -0.9270601 | 4.5785146  | -2.2433729 |
| C | 0.2410775  | 0.4440145  | 0.9252071  |
| C | 1.2955124  | -0.3609864 | 0.5170549  |
| C | 1.0412893  | -1.5654817 | -0.1240423 |
| C | -0.2673690 | -1.9649780 | -0.3569882 |
| C | -1.3218039 | -1.1599771 | 0.0511641  |
| C | -1.0675809 | 0.0445183  | 0.6922613  |
| F | 0.4849090  | 1.5992753  | 1.5400990  |
| F | 2.5506775  | 0.0221804  | 0.7404790  |
| F | 2.0526226  | -2.3375775 | -0.5155110 |
| F | -0.5112005 | -3.1202387 | -0.9718800 |
| F | -2.5769691 | -1.5431438 | -0.1722600 |
| F | -2.0789141 | 0.8166141  | 1.0837299  |
| H | 0.3746738  | 2.4269314  | -1.9710686 |

17

H-NHOH...perfluorobenzene Dimer

|   |            |            |            |
|---|------------|------------|------------|
| N | -0.6086988 | 3.3098983  | 1.3902164  |
| H | -1.3833774 | 3.8021732  | 1.8193915  |
| O | 0.4578525  | 4.2281355  | 1.3539886  |
| H | 0.6422898  | 4.3309875  | 0.4119700  |
| C | 0.2779049  | -1.9424417 | 0.3878346  |
| C | 1.3292377  | -1.1423807 | -0.0376645 |
| C | 1.0703114  | 0.0494361  | -0.7002156 |
| C | -0.2399479 | 0.4411936  | -0.9372686 |



|   |            |            |            |
|---|------------|------------|------------|
| C | -1.2912807 | -0.3588674 | -0.5117695 |
| C | -1.0323545 | -1.5506842 | 0.1507816  |
| F | 0.5262473  | -3.0855421 | 1.0233035  |
| F | 2.5859384  | -1.5181250 | 0.1896989  |
| F | 2.0786694  | 0.8167939  | -1.1083222 |
| F | -0.4882904 | 1.5842940  | -1.5727376 |
| F | -2.5479814 | 0.0168770  | -0.7391329 |
| F | -2.0407124 | -2.3180420 | 0.5588881  |
| H | -0.3798259 | 2.4745340  | 1.9129885  |

15

H-NO...perfluorobenzene Dimer

|   |            |            |            |
|---|------------|------------|------------|
| N | -0.5587337 | 3.4288035  | 1.6120121  |
| O | 0.3969625  | 4.0875479  | 1.2858361  |
| C | -0.1922362 | 0.5630279  | -0.8972900 |
| C | -1.2794861 | -0.2099263 | -0.5140441 |
| C | -1.0761255 | -1.4281879 | 0.1191439  |
| C | 0.2144851  | -1.8734972 | 0.3690870  |
| C | 1.3017349  | -1.1005430 | -0.0141588 |
| C | 1.0983744  | 0.1177186  | -0.6473469 |
| F | -0.3872842 | 1.7314922  | -1.5045961 |
| F | -2.5173412 | 0.2171808  | -0.7537707 |
| F | -2.1189324 | -2.1695469 | 0.4867243  |
| F | 0.4095331  | -3.0419615 | 0.9763931  |
| F | 2.5395900  | -1.5276501 | 0.2255677  |
| F | 2.1411812  | 0.8590776  | -1.0149273 |
| H | -0.3258847 | 2.5189047  | 2.0861605  |

16

H-NO2...perfluorobenzene Dimer

|   |            |            |            |
|---|------------|------------|------------|
| O | -0.9081759 | 3.8084312  | 1.0779960  |
| O | -0.9081759 | 3.8084312  | -1.0779960 |
| N | -1.2093657 | 3.3319924  | 0.0000000  |
| C | 1.0178671  | 0.2115605  | 0.0000000  |
| C | 0.6470376  | -0.3750381 | 1.2020130  |
| C | -0.0946202 | -1.5482336 | 1.2020130  |
| C | -0.4654496 | -2.1348322 | 0.0000000  |
| C | -0.0946202 | -1.5482336 | -1.2020130 |
| C | 0.6470376  | -0.3750381 | -1.2020130 |
| F | 1.7292091  | 1.3368009  | 0.0000000  |
| F | 1.0027092  | 0.1875829  | 2.3548920  |
| F | -0.4502917 | -2.1108546 | 2.3548920  |
| F | -1.1767917 | -3.2600725 | 0.0000000  |
| F | -0.4502917 | -2.1108546 | -2.3548920 |
| F | 1.0027092  | 0.1875829  | -2.3548920 |
| H | -1.7622478 | 2.4574127  | 0.0000000  |

18

H-OCF3...perfluorobenzene Dimer

|   |            |            |            |
|---|------------|------------|------------|
| C | 0.0259780  | 3.4494972  | -0.5406877 |
| O | 0.8550770  | 2.5837055  | -1.1457432 |
| F | -0.7748632 | 2.8568033  | 0.3635954  |
| F | -0.7734609 | 4.0964253  | -1.4082948 |
| F | 0.7675324  | 4.3539718  | 0.0926734  |
| C | 0.3598620  | -0.5135914 | 1.0195054  |
| C | 1.3369627  | -1.3216703 | 0.4549433  |
| C | 0.9718214  | -2.4187496 | -0.3128671 |
| C | -0.3704212 | -2.7077517 | -0.5161165 |
| C | -1.3475219 | -1.8996728 | 0.0484457  |
| C | -0.9823806 | -0.8025935 | 0.8162561  |
| F | 0.7100779  | 0.5386440  | 1.7559310  |
| F | 2.6243394  | -1.0444811 | 0.6498848  |
| F | 1.9089816  | -3.1937975 | -0.8543523 |
| F | -0.7206371 | -3.7599871 | -1.2525421 |
| F | -2.6348986 | -2.1768620 | -0.1464959 |
| F | -1.9195408 | -0.0275456 | 1.3577412  |
| H | 0.5132169  | 1.8456808  | -1.6623390 |

15

H-OH...perfluorobenzene Dimer

|   |            |            |            |
|---|------------|------------|------------|
| O | 0.0628301  | -3.3613277 | -2.1923078 |
| H | -0.8295182 | -3.7094583 | -2.0759416 |
| C | 0.0018243  | -0.9483053 | 0.6884322  |
| C | -1.1994029 | -0.2896104 | 0.4656724  |
| C | -1.1978336 | 1.0258514  | 0.0229514  |
| C | 0.0049628  | 1.6826202  | -0.1970103 |
| C | 1.2061900  | 1.0239253  | 0.0257496  |
| C | 1.2046207  | -0.2915365 | 0.4684706  |
| F | 0.0003191  | -2.2099967 | 1.1130566  |
| F | -2.3530333 | -0.9195333 | 0.6766429  |
| F | -2.3499589 | 1.6576218  | -0.1907030 |
| F | 0.0064680  | 2.9443116  | -0.6216347 |
| F | 2.3598204  | 1.6538483  | -0.1852210 |
| F | 2.3567460  | -0.9233069 | 0.6821250  |
| H | 0.0216926  | -2.4508626 | -2.4987642 |

18

H-OMe...perfluorobenzene Dimer

|   |            |            |            |
|---|------------|------------|------------|
| O | -0.6178795 | 3.2559679  | 1.5992871  |
| C | 0.4397018  | 4.1035849  | 1.1882254  |
| H | 1.0756926  | 3.6062806  | 0.4515354  |
| H | 1.0424730  | 4.4197004  | 2.0433546  |
| H | -0.0328169 | 4.9707643  | 0.7352356  |
| C | -0.2237089 | 0.4825078  | -0.9064148 |
| C | -1.2936199 | -0.3136621 | -0.5218998 |
| C | -1.0631971 | -1.5305035 | 0.1047151  |
| C | 0.2371370  | -1.9511769 | 0.3468159  |

|   |            |            |            |
|---|------------|------------|------------|
| C | 1.3070480  | -1.1550071 | -0.0376991 |
| C | 1.0766252  | 0.0618344  | -0.6643140 |
| F | -0.4447130 | 1.6496100  | -1.5074163 |
| F | -2.5408010 | 0.0898162  | -0.7541046 |
| F | -2.0893738 | -2.2941293 | 0.4735127  |
| F | 0.4581411  | -3.1182792 | 0.9478174  |
| F | 2.5542292  | -1.5584853 | 0.1945058  |
| F | 2.1028019  | 0.8254602  | -1.0331116 |
| H | -0.3856576 | 2.4276258  | 2.0274163  |

18

H-SCH3...perfluorobenzene Dimer

|   |            |            |            |
|---|------------|------------|------------|
| S | -0.6412025 | 3.4635169  | 1.0653761  |
| C | 1.0039554  | 4.1244077  | 0.7080363  |
| H | 1.5895036  | 3.4307304  | 0.1052650  |
| H | 1.5387168  | 4.3777999  | 1.6230286  |
| H | 0.8375088  | 5.0351176  | 0.1341927  |
| C | -0.1776273 | 0.1064089  | -1.0104256 |
| C | -1.2763459 | -0.6291256 | -0.5882242 |
| C | -1.0920266 | -1.7934431 | 0.1444661  |
| C | 0.1910117  | -2.2222278 | 0.4549562  |
| C | 1.2897304  | -1.4866934 | 0.0327548  |
| C | 1.1054110  | -0.3223759 | -0.6999355 |
| F | -0.3544124 | 1.2231341  | -1.7131667 |
| F | -2.5069383 | -0.2178675 | -0.8860228 |
| F | -2.1458335 | -2.4989120 | 0.5494097  |
| F | 0.3677968  | -3.3389531 | 1.1576973  |
| F | 2.5203227  | -1.8979514 | 0.3305534  |
| F | 2.1592179  | 0.3830930  | -1.1048791 |
| H | -0.3664270 | 2.3515712  | 1.7684137  |

15

H-SH...perfluorobenzene Dimer

|   |            |            |            |
|---|------------|------------|------------|
| S | 0.0490553  | 3.7491485  | 1.3231791  |
| H | -1.2780500 | 3.9184621  | 1.2318103  |
| C | -0.0117885 | 0.4811964  | -0.9369163 |
| C | -1.2050727 | -0.1405315 | -0.5963654 |
| C | -1.1878018 | -1.3585721 | 0.0688586  |
| C | 0.0227532  | -1.9548865 | 0.3935326  |
| C | 1.2160374  | -1.3331586 | 0.0529817  |
| C | 1.1987666  | -0.1151180 | -0.6122423 |
| F | -0.0283534 | 1.6494487  | -1.5749488 |
| F | -2.3661446 | 0.4314082  | -0.9077682 |
| F | -2.3323088 | -1.9548865 | 0.3954892  |
| F | 0.0393181  | -3.1231389 | 1.0315651  |
| F | 2.3771093  | -1.9050983 | 0.3643845  |
| F | 2.3432736  | 0.4811963  | -0.9388729 |
| H | 0.0046524  | 2.5724313  | 1.9658853  |

17

H-SiF3...perfluorobenzene Dimer

|    |            |            |            |
|----|------------|------------|------------|
| Si | -0.0000965 | 3.2164429  | -0.7112142 |
| F  | 0.0136354  | 2.8027996  | 0.8321730  |
| F  | -1.3043293 | 4.1148028  | -0.9197740 |
| F  | 1.2903968  | 4.1300849  | -0.9380714 |
| C  | -0.0000129 | -0.5359220 | 1.0867421  |
| C  | 1.2020297  | -1.0821838 | 0.6587942  |
| C  | 1.2020889  | -2.1748425 | -0.1970918 |
| C  | 0.0001054  | -2.7212410 | -0.6250313 |
| C  | -1.2019371 | -2.1749792 | -0.1970835 |
| C  | -1.2019963 | -1.0823205 | 0.6588026  |
| F  | -0.0000696 | 0.5120736  | 1.9076432  |
| F  | 2.3548803  | -0.5581197 | 1.0692414  |
| F  | 2.3549962  | -2.6987755 | -0.6075470 |
| F  | 0.0001622  | -3.7692366 | -1.4459324 |
| F  | -2.3547878 | -2.6990433 | -0.6075307 |
| F  | -2.3549037 | -0.5583875 | 1.0692578  |
| H  | -0.0001418 | 2.0741900  | -1.6245768 |

17

H-SiH3...perfluorobenzene Dimer

|    |            |            |            |
|----|------------|------------|------------|
| Si | 0.0000034  | 3.8198459  | 1.3514946  |
| H  | -0.0032705 | 4.9354641  | 2.3385265  |
| H  | 1.2196826  | 3.9501064  | 0.5082515  |
| H  | -1.2162655 | 3.9481474  | 0.5030191  |
| C  | -0.0000341 | 0.4623055  | -0.9209158 |
| C  | -1.2020311 | -0.1507073 | -0.5955448 |
| C  | -1.2019990 | -1.3766838 | 0.0551670  |
| C  | 0.0000300  | -1.9896492 | 0.3805087  |
| C  | 1.2020270  | -1.3766364 | 0.0551377  |
| C  | 1.2019949  | -0.1506600 | -0.5955741 |
| F  | -0.0000649 | 1.6381693  | -1.5450293 |
| F  | -2.3549255 | 0.4372027  | -0.9075879 |
| F  | -2.3548626 | -1.9646393 | 0.3672382  |
| F  | 0.0000608  | -3.1655130 | 1.0046221  |
| F  | 2.3549214  | -1.9645465 | 0.3671808  |
| F  | 2.3548585  | 0.4372955  | -0.9076454 |
| H  | -0.0000106 | 2.4949995  | 2.0282864  |

18

H-CH2OH...perfluorobenzene Dimer

|   |            |            |            |
|---|------------|------------|------------|
| C | -0.6591009 | 3.4027017  | -1.5514863 |
| H | -1.2452461 | 3.1913266  | -0.6502632 |
| H | -1.2753827 | 4.0104772  | -2.2232409 |
| O | 0.5352980  | 4.0916102  | -1.2156108 |
| H | 0.3096555  | 4.9202632  | -0.7797548 |
| C | 0.3059732  | -1.9553247 | -0.3571375 |

|   |            |            |            |
|---|------------|------------|------------|
| C | -1.0113502 | -1.5784406 | -0.1356313 |
| C | -1.2919739 | -0.3750348 | 0.4964359  |
| C | -0.2552745 | 0.4514887  | 0.9069977  |
| C | 1.0620490  | 0.0746046  | 0.6854914  |
| C | 1.3426726  | -1.1288012 | 0.0534243  |
| F | 0.5751262  | -3.1095404 | -0.9633685 |
| F | -2.0056729 | -2.3711792 | -0.5294110 |
| F | -2.5554499 | -0.0135559 | 0.7088880  |
| F | -0.5244275 | 1.6057044  | 1.5132287  |
| F | 2.0563716  | 0.8673433  | 1.0792712  |
| F | 2.6061487  | -1.4902800 | -0.1590279 |
| H | -0.4127191 | 2.4655669  | -2.0442330 |
